# Supplementary material
Source: Research Square preprint supplement (doi:10.21203/rs.3.rs-9836014/v1)
Supplement: Supplementary file 1 [file 3c7268f7ec37dd14490cf5ce.xlsx]

## Sheet: Sheet1
ASV ID	W_1	W_3	W_6	W_7	W_8	W_9	W_10	W_11	W_12	S_16	S_17	S_18	S_19	L_1	L_2	L_4	L_9	L_11	S_2	S_3	S_4	S_5	S_6	D_2	D_3	D_5	D_6	D_7	D_8	D_9	D_10	D_12	D_14	D_15	Y_1	Y_4	Y_6
b65f0ae345495616c4355153b37a9695	39414	1968	3584	33	2706	1505	17	551	20	24	27	24455	65	4323	2523	35	35	6199	1758	6800	12967	17079	9316	79	4005	243	30	11720	35	368	6552	3735	21427	4029	3227	12330	24084
d7463dce1ab4db9cf8f134047723bc85	140	364	5048	409	2974	6631	6048	1803	2095	4303	6047	12286	90	159	500	954	3123	237	1827	7735	11694	8919	22410	25931	1442	21177	146	10970	416	1944	11642	106	6576	4626	2340	2333	15409
ed3a5d11cf7034be564e9d0b57371931	80	16061	0	2	13	0	15	14	1701	276	2891	0	41	61084	2	0	16	34	41853	46	20511	58	47	8864	60	642	27096	0	0	19	6	66	0	45	9149	20	5
fd9276855a6e35641fbbd068c02a817b	4534	109	0	296	9	15	11	1217	670	7237	328	202	60	23153	920	930	488	514	1156	165	2116	3768	122	2025	116	56283	1170	84	278	545	80	652	2177	43	63	10046	112
4303b62f2e51d673d81303f585bcb1c5	49	12775	0	2598	0	0	0	9	0	4	0	0	0	14	0	0	4343	0	0	12	1007	419	0	0	2797	5	0	10	0	72354	660	15795	42	6	0	0	12
591ed1d6afd1e79ae33d6b6cd0c6b185	2107	508	100	283	84	18	404	7559	73	629	1975	12	6694	5673	2136	629	2174	487	5100	54	1153	45	43	41741	144	560	150	61	680	4	60	28	3372	7	218	10	1228
a3e5ed4f236ccc0603c2f0bb49cf6883	0	0	0	0	11	54	63	63	58188	76	54	0	3	0	23	229	22	46	0	34	11100	13	0	35	192	0	13	5347	23	0	62	9	23	3088	2156	32	0
ee126b2b5e8b9eacb2c74be10366053a	4673	1018	879	46	201	181	440	181	25	9443	717	4146	22	334	2150	28	200	262	297	8142	730	14185	414	1268	616	4353	15	1192	11	743	961	946	6535	686	83	3899	1271
1a379480556fdd1cb193ae0a3cfc406a	40	15442	0	48	0	0	0	13	603	0	6	0	0	41	0	0	190	0	27	28	49	36	20	192	45618	75	131	0	0	1143	8	4394	11	8	229	0	10
eab12ce3a8d7104e75d2361ebbb2dca2	9695	103	568	14	10	223	10	2078	17	19	9	6638	39	1780	8198	139	89	1980	0	13498	2931	2233	27	14	103	228	10	188	9	502	4312	617	5121	880	40	1043	667
fd3535694d2b7a277ba314190c86c61b	0	0	0	0	0	19	39615	39	210	61	29	0	15	0	0	693	7017	13	0	114	8	0	16	0	0	0	0	0	13	0	0	0	573	0	15	108	0
31d5ab366a86a8a34fd361957c8bb4e9	69	4488	0	1637	12	0	28	1646	309	46	5148	422	100	4	62	13630	1197	25	1463	1980	278	15	106	1581	5002	800	46	145	766	868	17	1484	49	609	3192	13	77
04d34c2af12c10d8dd3cc067e23f8863	0	14	3382	31	15	10	28	59	36	12526	16	191	9	156	7325	18	121	18	19	5964	14	432	274	10	4	15	6	1247	16	359	5406	22	1203	6779	0	40	1476
766b73c19ef38eaec80e8787441a6ef0	460	1780	1691	34	143	95	0	62	12	740	71	4099	20	240	2916	25	43	21	238	2231	24	14978	622	362	38	183	29	339	0	411	3634	669	6947	1488	60	904	985
1ea5dbf91ed43507c5a85cc496123211	0	0	0	33	0	0	0	0	19	0	0	0	0	0	8	0	60	32457	0	41	26	0	98	13	45	0	0	623	0	748	22	0	0	11	0	29	12302
c9cdfe7e464cfa990c0f0afad12aaeb1	0	0	0	0	0	0	0	2	25	0	0	0	2	0	997	0	0	17	0	0	0	0	0	41	0	0	0	0	0	0	25	0	0	0	33	44271	25
4bbb4d44015e8cead6d215f85cdd8457	0	238	369	24	14	10	6	0	18	4555	7	430	0	482	0	0	6	0	536	2237	52	8633	2160	34	16	57	16	871	48	313	1020	110	17081	1928	6	4157	0
ffa28c0c4f9f3720b646af2871b729a4	3922	214	1189	232	419	467	217	11349	29	709	565	1626	26	6235	744	298	215	0	193	1797	1083	433	41	521	164	2711	7	161	105	85	4858	21	3080	203	289	216	921
ae92751ce0103cf1fe77dd7f219da00c	46	2522	0	1877	0	13	51	30	276	30	19	86	47	26	85	4885	1331	0	16	73	59	50	448	871	5087	80	76	826	93	679	69	665	168	7539	14234	34	26
e03a2cdd0bb51190a95d1133f3a8338c	9	60	5	32674	38	0	10	567	0	85	94	961	8	0	52	408	40	15	996	631	97	13	335	2707	133	1173	27	94	369	25	11	0	230	52	0	0	11
dab1fcba6c45c268fdd093ff0cfdb1c6	0	0	132	2	264	75	30	120	0	0	266	64	35627	0	52	31	3319	5	0	5	0	0	8	0	0	0	0	0	11	0	0	4	0	0	3	0	11
af7dac7608a3d3a3d80e26ccd2d77f1d	0	134	0	0	149	217	0	78	0	280	28	3779	6	0	359	7	18	510	792	3567	1864	10547	554	849	559	26	16	3880	12	203	2369	238	520	358	25	386	1887
dfbc5a897102ae09df8a3362d56db38e	0	0	0	366	6	0	25	0	0	0	0	0	7	0	0	0	2080	0	0	0	0	0	0	0	0	0	0	0	0	217	35	373	0	0	29454	45	0
f4b95f1d118625611201c7f515f1b74d	1337	24	2247	183	114	590	1554	296	17	2832	720	5653	74	28	2611	450	87	13	177	1662	1486	837	851	54	277	181	0	121	12	523	1650	210	362	1556	15	139	291
83616dd5802b48f7dcbdc6cbaaf18cfa	38	0	725	7	0	527	24	8652	37	30	8	13	12	0	16888	0	0	5	0	0	0	5	0	13	0	0	0	0	0	0	10	0	0	0	0	7	0
47cb811eb8820c6a0a68645577240ba1	0	45	36	4	0	0	0	0	2	8	0	103	0	5514	216	0	0	294	0	5891	1842	689	0	5	55	8	2	409	0	657	3974	749	3466	790	0	1921	0
e517c7e218685b49b52c8bdfa9b74cf3	0	0	0	114	0	0	40	0	0	10	0	0	20	0	0	70	83	0	19	0	0	73	33	0	60	0	1176	1419	21587	0	76	48	228	41	31	0	3
9f777d99c764a7996e9804cdcc2d1add	0	358	33	18010	55	0	0	0	0	26	0	0	0	0	0	0	0	261	56	0	0	31	1186	0	49	48	0	0	772	104	0	691	35	0	0	11	1572
40733c349bb72e5a657ae7f501f86eaf	436	0	175	127	554	202	1797	14148	30	29	163	16	0	378	3146	0	0	0	5	834	6	3	0	0	0	0	0	0	0	0	3	0	7	0	0	5	135
ae7d8efb06e9c0ad71820823c3089849	0	0	0	10	9	10	9	154	9803	17	11	0	0	0	7	46	23	127	0	10	3140	0	0	12	360	346	0	42	11	40	48	3922	19	812	583	0	0
f8ddd6facf2802b88d442d34793ebd77	0	167	0	3853	0	0	18	0	0	0	0	0	6	0	0	0	9	0	0	0	0	39	8255	21	125	0	12	12	3116	245	16	0	0	14	15	0	3313
57ffcda523f20870604cf1e70a5bb1a7	25	1354	0	52	0	3	0	0	0	0	170	0	21	80	0	284	1444	203	3953	9	662	356	151	1396	2192	862	276	223	0	150	648	2698	18	0	0	7	0
590b7f1b7864854c8b0d0616b397fb8f	27	16235	0	0	0	0	0	0	0	0	0	0	0	57	0	0	17	0	0	0	0	0	0	0	0	0	11	7	0	0	381	0	0	0	0	0	0
f68d9b7a447905f340b84e1f3328bbd4	0	3	18	0	10	518	0	839	1542	21	7	2710	0	15	5185	0	1140	23	0	24	5	9	92	0	12	1467	2	275	0	0	16	7	35	0	7	9	2405
d984db1e47658964bcc0dc267521e09f	239	186	14	83	9903	22	3	2821	11	219	189	0	0	0	1140	2	4	2	28	41	23	0	4	6	0	0	19	0	0	31	14	7	0	78	14	0	40
ecffe0ab1ced1947ddff50c39638bd19	17	3702	0	0	0	0	0	0	365	0	0	0	0	0	0	0	0	0	0	0	16	19	0	0	9802	18	46	0	0	139	0	494	0	0	9	0	0
2257d58ebb22a4168da71744993d1ce9	0	0	0	0	0	0	0	0	0	0	0	4	0	12	0	8	0	0	0	0	146	8	0	0	0	21	0	3837	17	97	27	7872	17	723	45	0	4
8f61e623de7d7f2e3072dcb712056fa7	6	266	0	2252	0	0	9	5	0	3	0	0	4	0	52	26	6594	0	0	34	227	14	816	0	34	4	7	25	98	842	160	128	0	5	0	0	1135
b949c87b066470b99bb0bea8a6053514	1069	7	0	0	0	0	0	51	17	21	79	71	33	2843	136	198	0	15	26	0	324	484	0	50	0	3959	64	0	0	392	11	235	95	0	0	2555	0
bce71cf56c53dd06383c00d57fb4bea1	0	0	0	0	0	0	0	0	14	0	0	0	0	0	24	0	311	11	0	0	0	0	0	8	0	0	0	4	0	30	11323	205	19	6	66	7	0
3176bdbb073fa98ebe5d318e362757a6	127	7716	15	0	0	0	0	137	46	0	0	41	0	0	26	0	115	0	27	351	0	6	89	1030	189	219	182	34	7	586	9	424	47	425	57	0	0
d55dfd1d247d45da3a6d8fc46db06039	2876	12	8	7	1563	1187	786	906	17	259	37	9	60	96	1031	0	0	3	0	446	14	17	0	10	0	0	3	0	0	0	510	4	4	7	0	0	1869
06aa1652176be0d4bf38768aaa7e2f1d	9	31	0	0	0	0	0	0	58	657	999	0	0	13	0	8	0	0	0	0	0	156	170	0	9	0	31	0	3	140	13	9351	21	0	0	0	70
e27fa9705d79b6bb38cdf35609b4a628	0	260	58	5	0	0	0	0	0	593	0	435	0	253	45	0	0	0	14	381	0	460	10	0	0	17	0	122	8	201	344	42	6705	287	0	668	0
b97c4727c0211310cf2dce63f7365386	0	10	14	0	0	9	31	0	0	0	0	0	25	0	0	0	6170	3667	0	31	13	2	0	0	0	0	0	0	2	0	0	0	0	0	2	0	0
fcf301787f44d6d43bcbbd1e38ddf8f8	0	0	0	0	0	2	0	0	4	0	0	0	0	0	3	12	0	3550	0	8	15	635	0	0	0	15	0	917	0	540	1379	2454	10	226	0	2	0
2b6962b7c393c59ce5c5edd55c1abac5	80	228	35	8	5	12	0	5	5	1999	87	7	8	299	374	11	7	0	44	70	5	416	577	15	49	31	0	134	0	103	35	0	2777	10	0	803	729
890fc68b383a943b3820fa4dfa17e6a0	0	0	0	0	0	7	24	0	0	0	0	0	0	0	0	0	0	0	0	18	0	51	0	0	0	0	144	163	8280	0	36	31	114	20	0	0	0
d89a91cb2aed526bb536f171d7416d1f	0	0	0	0	0	0	0	0	0	0	0	0	0	0	0	0	0	0	0	0	0	0	0	18	10	8576	0	0	0	0	0	0	15	0	0	0	0
e0d2650d45a679a95c3b262642d93d52	27	4026	0	0	0	0	0	0	1135	0	0	0	0	8	0	0	14	0	895	0	14	9	0	6	8	21	2312	88	0	0	11	6	0	8	7	0	6
39afceb9b3a69428d9b836f6cdf37b41	0	0	0	0	0	0	0	0	0	0	0	0	0	0	0	328	0	309	0	0	0	249	0	0	0	2220	7	1994	0	254	0	2435	0	642	69	0	0
8df059728dc6eea0837b436f0d470654	0	0	0	0	741	1569	0	44	0	0	0	8	0	0	7	293	0	0	0	1166	0	0	0	0	5	0	0	44	0	0	0	0	0	0	8	3	4606
52b02f629fea45643a10b36492b013ed	86	0	0	0	0	0	0	0	0	0	0	0	0	0	0	0	0	31	0	0	0	0	0	0	0	8249	0	0	0	0	0	0	0	0	0	0	0
13c80fe80f74aed26c7ef39892842477	8178	26	17	0	0	0	0	35	0	0	0	0	0	0	7	0	0	0	0	0	0	0	0	0	0	0	0	0	0	0	0	0	0	0	0	0	0
62521fe10644fbdeede7e4bc0ae998fb	85	86	0	0	517	0	0	0	0	364	201	2234	0	137	0	73	35	0	153	1412	0	2736	0	0	0	0	0	57	0	149	0	0	0	0	0	0	0
d60eb54f074e869519339d4d4c9dff0b	203	0	5	52	0	0	3	11	2703	164	401	65	20	1147	43	868	270	836	155	3	0	281	0	16	135	12	100	0	42	369	0	72	69	0	46	84	0
924b48cf897bb4394fda7e027a079c54	0	0	0	15	0	0	0	12	0	0	0	0	0	0	587	7	0	0	0	0	130	0	0	2	0	0	3	14	0	103	3970	56	1969	1041	70	2	0
4b38473099dc5f18b73be535e282921a	0	0	0	0	0	0	4	2	336	4	0	0	0	0	28	0	0	7240	0	15	9	0	0	0	2	0	0	0	0	13	6	96	5	0	0	4	3
9158ab694988e84ec137cfaee88fcd2a	227	28	0	5	0	13	23	26	4541	0	0	0	0	907	0	0	47	18	30	0	0	401	22	6	57	51	23	0	0	43	125	261	279	96	362	0	0
35444716732e5d6feeb3b67561a7d3d4	40	2	240	5	244	164	7	1748	9	6	7	3	0	78	4260	4	0	3	0	44	0	0	0	0	0	0	0	0	0	19	2	0	20	0	0	0	522
348014fa54a4c48c3b12edd5676cfadf	2616	0	2009	12	258	284	0	44	0	0	0	0	16	0	377	0	0	39	0	0	0	0	0	0	0	0	0	0	0	26	89	18	1258	15	0	0	83
15f7dc4a54cedc93e58d84b41c8c8f2a	0	0	264	0	0	0	0	15	3	0	0	2	2	76	6246	2	0	2	0	0	0	0	0	3	0	0	0	0	0	0	0	0	51	0	0	3	220
26ec17fc3fb52e1e38eb1abf97c7d6ae	0	11	143	33	183	0	0	73	7	1194	279	1627	5	0	529	16	34	5	10	15	198	70	84	198	42	491	0	110	0	141	358	22	65	175	0	29	534
6b6795ae348b96ece97d2f3aa4a75e5a	0	0	0	35	4	31	150	0	15	126	44	283	0	0	14	0	0	3	6	0	143	119	1151	693	321	3187	6	192	0	5	0	3	6	0	7	0	119
da1dbaa408f3ce3c0ca87606553efbbd	0	0	0	0	107	35	0	98	0	0	86	0	6335	0	0	0	0	0	0	0	0	0	0	0	0	0	0	0	0	0	0	0	0	0	0	0	0
e3e618b6c0b173feb5ba627d9a96d485	0	0	0	0	8	0	0	0	0	0	0	0	0	0	0	0	0	47	0	0	0	0	0	0	0	0	0	0	0	37	0	45	0	0	6331	15	0
9a9ed2eb287ccb711f67f2dcef4ccde1	15	0	677	38	122	767	204	33	0	2111	253	533	8	11	697	114	32	0	0	47	0	0	14	0	0	5	5	15	0	12	0	5	69	0	0	0	566
40ef042cb2d7e9e51a8dad360a9c4cd6	0	0	0	0	0	0	0	3	0	0	0	0	0	9	0	0	1376	4767	2	13	4	0	0	0	0	0	0	53	0	25	6	0	0	0	0	4	0
b118afc31f8315347a980353116ca46e	0	0	0	0	0	0	0	0	0	0	0	0	0	0	0	195	0	445	0	0	0	0	441	0	0	0	0	0	0	118	0	0	0	0	0	0	5054
ca25eaafd35515e84db7e41d08aebc03	0	11	611	2	8	0	4	7	10	11	3679	0	60	5	357	65	0	0	4	109	3	0	130	21	0	0	0	78	0	34	52	0	876	5	0	0	10
7f8cab0ee83c3fe5e45679b389fcaf8d	550	21	263	66	318	49	650	54	0	1623	1120	47	41	0	0	252	37	0	12	0	0	0	79	110	0	151	0	109	0	0	152	0	0	0	13	0	391
194a2c0aebe478f53f7e8ac50c03b1b0	0	4	15	87	41	0	711	0	10	19	3437	0	166	0	57	653	133	0	0	99	0	0	0	5	0	0	10	0	0	0	0	0	0	0	0	0	533
4dfe4b9ae6d9359e3b602b8d8155c7d2	0	0	0	0	0	0	3	0	0	0	97	0	0	0	0	0	0	0	0	0	0	3910	475	0	39	0	0	1281	4	0	0	0	0	0	0	0	0
d0d18dcc7ab39e927289f89143efc2c4	11	5553	0	0	0	0	0	0	0	0	0	0	0	0	0	0	0	0	0	0	0	0	0	0	0	0	0	0	0	0	0	0	0	0	0	0	0
d8eb7b0ac66168e7672ad920bb1a0e88	2302	12	66	5	31	53	0	36	10	135	0	87	0	0	89	0	18	0	55	540	0	97	160	0	5	5	0	31	0	75	1144	0	66	14	0	15	302
b2d5b155a98e53f9f25ddbace6b46604	0	0	0	0	0	0	0	0	4396	72	0	0	0	0	5	30	0	6	0	0	0	0	0	11	0	0	363	0	0	0	0	0	6	0	0	436	0
671630930bf2a8876d01b5fc9b581ce9	5247	17	0	0	0	0	0	19	0	0	0	0	0	0	0	0	0	0	0	0	0	0	0	0	0	0	0	0	0	2	0	0	0	0	0	0	0
281ad7572f59851a2a162d5fd2835b52	18	37	0	35	0	0	0	0	0	0	7	0	0	0	0	0	0	0	0	0	5	10	11	19	20	31	5063	0	0	0	0	0	0	9	0	0	0
424b57a55f644500f48a0de763d1f701	14	0	201	0	274	4276	9	32	5	91	5	0	0	0	18	23	0	0	0	23	0	7	0	0	0	13	0	18	0	6	0	0	0	0	15	44	146
9e266ef84f7c493ab97e47ccc83d2b14	0	0	0	0	0	0	0	0	0	0	0	0	0	0	0	0	0	0	0	0	0	206	4812	0	88	0	0	0	0	0	0	0	0	0	0	0	0
a730f4fcd4271cb06398e1f6da239bd2	88	0	0	109	0	6	5	1378	0	112	1904	23	13	0	8	255	0	12	199	43	15	0	107	87	0	143	0	16	461	0	0	0	0	10	4	0	39
d36286210314df547be0ff7945d84c84	0	10	0	10	87	17	69	6	6	2229	0	1048	4	7	0	0	0	4	0	736	4	94	0	0	0	9	0	8	0	25	11	0	596	0	0	0	0
89d4c9e3c39c9f3188f6e2845ec00e90	0	0	0	0	0	0	0	0	3991	54	0	0	0	0	0	22	0	0	0	0	0	0	0	0	0	0	510	0	0	0	9	0	0	0	0	393	0
22632c954ef155ebb0c3d54d46fac742	0	0	0	0	0	0	0	103	0	0	0	2	0	0	0	17	30	131	0	0	199	62	0	0	2	0	0	947	0	186	147	1225	15	1436	346	0	2
fd88fc091688973c50015642a25f36f5	0	0	0	37	3930	353	0	0	18	0	0	0	0	0	0	0	0	0	0	149	14	13	0	0	0	0	9	0	0	0	0	0	0	6	0	0	130
1de03a8ec16d4b604455febc8e743079	0	26	19	0	120	0	0	0	0	901	0	41	0	88	555	0	0	5	9	80	0	132	24	0	0	0	0	86	0	219	130	50	1436	222	0	190	255
c7d2a63698d1805f7d5a309ac80e0026	0	0	0	0	0	0	0	0	0	0	0	0	0	0	0	0	0	0	0	0	0	0	0	0	0	0	0	0	0	0	0	9	4294	0	0	0	0
15752de6ff995381f8ec299adaf3641b	111	0	0	50	8	5	6	2403	4	10	1467	0	55	0	0	92	0	0	27	0	0	0	0	5	0	0	0	3	11	0	0	0	0	0	0	0	3
4161865514041227740b5a7ffe12c92c	0	0	0	41	0	0	0	0	0	0	0	0	0	0	0	0	2759	0	0	0	0	0	0	0	0	0	0	0	25	216	278	884	0	0	0	0	0
b5191928d128bcb3545005eb5a5e5ba6	601	9	0	0	0	0	0	31	14	29	60	231	0	2591	13	38	0	141	5	8	36	16	0	5	0	6	209	0	0	52	0	5	40	0	0	61	0
4644ae5e47242883eace0cec9147b450	0	121	0	5	0	0	0	0	0	0	0	0	0	0	0	5	0	2441	0	0	6	54	0	0	0	63	0	58	0	37	193	1177	4	7	0	0	0
96ceb8b2f2cb2abe8d6440cac8064fc9	14	0	6	7	1431	0	0	196	0	10	17	0	0	0	0	25	2129	252	0	9	9	0	2	0	0	0	0	0	0	0	0	0	0	0	0	0	0
a7aa4a9c9a987e46d3f0330457f15693	480	0	33	0	0	0	0	1392	0	31	760	0	0	102	0	0	301	0	105	0	682	0	0	0	0	0	0	0	88	0	0	0	83	0	0	0	33
dd2d191fe29f044fe1b02af86e55572a	0	0	0	1284	12	0	6	547	0	544	526	102	0	0	0	143	0	4	66	196	0	0	46	307	26	0	0	0	238	0	0	0	6	0	0	0	25
a8962daab94bca7427973cc6dc80fa9c	77	926	0	0	0	0	0	0	0	0	0	0	0	0	0	0	0	37	0	34	407	0	0	0	424	0	0	0	0	915	0	1203	0	0	0	0	0
231a63bb61463699c426c00cc1d4ddf5	903	0	0	0	0	0	0	0	0	0	0	1687	0	184	0	0	0	0	0	441	120	114	0	0	0	0	0	0	0	0	300	0	186	0	0	0	55
dea8e1e1065d19eed28982f51f086f6a	35	0	0	0	0	0	0	0	7	13	0	0	10	8	0	0	0	3	0	0	0	316	0	7	0	0	29	0	0	0	7	68	0	0	4	3475	0
312555586fe415c688e5a9ae0314c988	0	309	0	594	0	0	0	0	0	0	0	0	0	0	10	7	189	153	73	0	99	63	10	0	276	2	0	0	131	689	776	176	0	0	222	0	123
d0c10ebd9371a6a639e896c542acdcaa	0	0	0	6	0	0	0	0	0	0	0	0	0	0	46	0	15	11	0	2726	0	0	0	0	0	0	0	0	0	18	31	0	10	0	0	726	0
a03dd30f63b9a854c6041c2a5d23c025	0	0	9	0	0	0	8	3	4	5	3489	0	0	0	0	0	3	0	0	0	0	0	0	0	0	0	0	0	0	0	0	0	0	0	0	0	0
b95d13f655293f019219432021539d15	0	4	0	0	0	0	0	0	1593	3	0	0	0	1764	0	0	0	33	0	0	0	0	0	0	0	0	0	0	0	0	0	64	0	50	0	0	0
f7b4bae74c0a130c0177b44f94ba3a10	0	0	0	0	0	0	0	0	0	0	0	0	0	20	0	166	0	422	0	0	0	0	0	2728	33	0	0	0	0	30	0	17	0	0	0	0	22
210c697bd23cc329240b76ae1af61df1	0	216	0	0	0	0	0	0	0	0	0	0	0	0	0	64	0	879	0	2	0	27	0	0	0	2	0	1048	0	42	8	999	12	139	0	0	0
27c1975369ad679cd189ddc8d8aedbdc	2	630	0	7	0	0	0	0	35	0	58	0	0	0	0	0	6	0	0	0	5	0	0	5	2114	3	16	0	0	105	0	436	0	0	0	0	0
5313e222edc4cf8f5448639278b49ef5	0	0	0	4	157	0	4	2	0	3173	3	0	0	0	0	0	0	0	2	4	0	0	33	0	0	4	0	0	0	2	0	0	0	0	0	0	0
a2a085664f7203e318c2edf521d3bac3	0	0	0	0	0	0	0	3	5	2985	8	72	0	0	148	0	35	0	4	102	0	7	0	0	0	0	7	0	0	0	0	0	0	0	0	0	0
af25917ff508198bbd6a9e986ebd93fc	0	0	0	0	0	0	0	0	0	0	0	0	0	0	0	0	0	0	0	0	0	0	0	0	0	0	0	0	0	0	0	0	3168	191	0	0	0
c05f21b7e087f0872939f40967958115	0	0	0	6	0	0	0	0	0	0	0	0	0	0	0	0	0	0	6	0	0	0	0	0	0	0	0	4	18	0	17	12	411	2880	0	0	0
c846a375f249411110c9ed3669472b62	0	38	0	0	11	2	0	3	4	1984	2	216	0	31	344	0	10	0	0	0	0	27	34	0	0	0	0	3	0	0	106	36	187	258	19	31	0
ad2e4f0f49659841b3136adf531f8719	15	382	0	0	0	0	0	618	13	0	0	0	0	0	0	1183	61	0	0	25	0	0	0	62	203	73	4	0	0	665	0	29	0	0	0	0	0
2f766c2b1dab7afac52c25876ec30d5a	0	0	0	0	0	0	0	0	0	0	0	0	8	0	0	0	0	0	0	0	0	0	0	0	0	0	0	0	0	0	33	0	3214	0	0	0	0
46e1c676a7f5ea03766042eb64ce2b42	0	0	0	0	0	0	0	0	0	0	0	0	0	0	0	0	0	0	0	0	0	0	0	0	0	0	161	149	2872	0	0	0	46	0	0	0	0
9b5c22155ef2883d0cadc7df9eb91ff4	0	765	0	0	0	0	0	0	0	0	0	0	0	0	0	0	0	0	0	0	0	0	0	31	2415	0	0	0	0	0	0	0	0	0	0	0	0
8bd4c4f10aa8c01258bbc4155d8c2868	0	0	0	0	11	0	0	0	0	5	10	0	0	0	0	0	0	0	0	0	0	0	13	0	0	0	6	0	0	29	13	0	603	2395	0	71	0
bf9d846f1d8e070a572351f291013171	0	36	0	111	0	0	0	527	0	57	433	169	26	0	32	941	0	0	78	34	0	0	0	413	119	160	0	17	0	0	0	0	0	0	0	0	0
4208097d55b92f05db543e4419a708b4	0	0	0	0	0	0	0	0	0	3058	0	0	0	0	0	0	0	0	0	0	0	0	0	0	0	0	0	0	0	0	0	0	0	83	0	0	0
d2c8c2fcce89387c481b305db65b72da	116	0	0	0	0	0	0	0	3	0	0	0	48	0	914	0	0	0	0	0	0	21	0	4	0	0	0	0	0	0	0	183	0	0	0	1850	0
5f91afbbcb124c2427fecac4f146e685	0	0	0	0	0	0	0	0	0	0	0	0	4	0	1038	0	0	404	0	0	0	120	0	0	111	0	0	911	2	146	255	132	9	0	0	2	0
aeb45d4555a30e901eb50596beac8c88	0	570	0	25	0	0	3	0	608	0	4	0	0	0	0	19	348	0	0	0	10	287	0	0	97	0	0	23	0	276	79	83	3	108	573	10	0
0f6d46c70548d4ce709802b6e3162f6f	57	0	0	42	61	0	4	0	0	0	0	0	1684	71	25	29	1061	18	0	6	0	0	0	0	0	4	0	0	0	0	0	0	8	0	3	0	0
d11e07c0ffe6eb69b31d15d65a3b26c0	0	0	0	0	0	0	0	0	0	2999	0	0	0	0	0	0	0	0	0	0	0	0	0	0	0	0	0	0	0	0	0	0	0	0	0	0	0
4e86bff593658880d24d5c75d1a29914	0	9	0	0	0	0	0	0	0	0	0	0	0	20	0	0	0	53	0	0	0	171	0	0	0	0	0	921	0	167	670	241	0	410	71	79	0
ab9079849063f3e53adf0ef6f53ae114	0	0	0	0	0	0	0	0	0	755	0	0	0	0	0	0	2030	8	0	0	0	0	0	0	0	0	0	0	0	0	0	0	0	0	0	0	0
22e287615fa702c3f195df5f243c8d03	0	0	0	0	0	0	0	0	0	0	0	3	3	0	2750	0	0	0	0	0	0	0	0	0	0	0	0	0	0	0	0	0	0	0	0	2	0
236aa9a40172cb7252e3eaaee3797de5	0	0	0	0	0	0	0	0	0	0	0	0	0	0	0	61	0	0	0	0	0	133	2438	0	122	0	0	0	0	0	0	0	0	0	0	0	0
166c3b8d4c52154a260d168744fdfb59	0	0	0	0	216	2419	29	0	25	31	15	0	0	0	0	0	0	0	0	0	0	19	0	0	0	0	0	0	0	0	0	0	0	0	0	0	0
f6a33022f97b860f8f34f39d989d6c45	0	0	0	0	0	0	8	0	8	14	2649	0	0	0	0	7	0	0	11	0	0	0	0	0	0	0	0	0	0	0	0	0	0	2	0	0	0
c14a968c9f0ba885e3eabbd106e76905	0	0	0	0	0	0	0	0	0	0	0	0	0	0	0	0	0	0	0	0	0	0	0	0	0	0	0	0	0	0	0	0	0	0	0	0	2695
c570ed4c5ffc9b5c985271a5aa239bfa	0	4	0	0	0	0	0	0	0	0	0	2	0	2183	0	209	224	0	2	0	0	0	0	2	0	0	0	34	0	0	3	0	17	2	0	0	0
c33981f696ab95f80af7f99bf9fadec7	0	0	0	0	0	0	0	235	0	0	0	0	0	0	0	0	0	0	0	0	0	1507	834	4	8	6	8	0	0	0	0	0	0	0	0	0	4
45eefddab97c1c0869f94f028cc87928	0	0	0	0	0	0	0	214	0	0	0	720	0	0	572	0	0	194	0	0	0	0	0	0	0	0	0	0	0	0	399	0	484	0	0	0	0
7b0f87611f2b936c752829bc1bc66185	0	0	117	5	254	0	1558	0	7	0	348	0	0	33	0	0	172	8	0	24	5	0	0	0	0	0	0	0	0	5	0	0	12	0	0	0	0
6f4d6aed70d31a86c54356cd9c2f5698	0	2456	0	0	0	0	0	0	0	0	0	0	0	0	0	0	0	0	0	0	0	0	0	0	0	0	0	0	0	0	0	0	0	0	0	0	0
d2e9de04fa55075fcb4dedcdbf380427	0	502	0	0	0	0	0	26	25	0	0	0	0	0	0	0	0	0	0	0	0	0	0	0	1697	0	0	0	0	86	0	117	0	0	0	0	0
05441919ec70f83a9cc1c747d36d3edf	5	0	0	0	0	0	0	0	0	0	0	0	0	14	0	0	0	0	4	0	0	0	0	0	0	0	0	2	0	3	0	2358	5	0	0	44	0
f977f8aa988f4aa5bd8af1afee1c34e1	159	4	24	0	30	11	2	9	0	45	64	97	0	0	0	4	0	0	7	146	0	0	985	428	0	23	169	0	8	0	30	0	15	3	25	0	140
e3ebf96f04142fd2462de3dba3c444a9	0	0	0	3	0	0	7	6	0	2360	0	0	0	0	0	0	0	0	0	0	0	0	0	0	0	0	0	0	0	0	0	0	0	0	0	0	0
47e1cd99205041c61f09de66e116df81	0	10	0	1352	0	0	0	0	0	0	6	0	0	0	10	0	3	112	0	0	0	3	515	36	10	4	0	0	260	0	0	2	0	0	0	0	27
fd4262fa0b2d2b1d52af1638feb30745	0	0	0	9	0	0	1585	0	0	0	0	66	0	0	0	0	0	0	0	0	0	0	0	642	0	11	0	0	0	0	0	0	0	0	0	0	0
70097bfb45b0ac48efb8a7638df4155d	0	0	0	0	0	0	0	0	12	0	0	0	10	0	0	0	0	0	0	0	0	986	0	8	4	0	0	0	0	0	0	0	0	0	0	1276	0
6887573d6bbe742d331a8840790c0642	0	0	22	0	34	42	0	0	0	118	0	34	0	0	263	0	0	6	17	310	0	81	58	17	0	0	0	29	0	0	975	0	110	12	0	0	127
821b07dae793d819f476c78716aeed08	0	0	0	0	0	22	0	0	0	0	0	143	0	0	0	0	0	0	0	0	16	1473	73	0	62	0	0	0	0	0	0	0	0	50	0	0	375
326ca70a76b62da25016db791757725f	0	0	0	0	0	0	0	2130	0	0	0	0	0	73	0	0	0	0	0	0	0	0	0	0	0	0	0	0	0	0	0	0	0	0	0	0	0
03395478c2af63ee6ebbfd80cc8d6d3b	0	0	0	0	0	0	0	0	0	280	0	0	0	0	0	0	0	0	0	0	0	136	0	0	0	0	0	0	0	0	0	32	0	0	0	1744	0
19e968c7972fe0da5fee6dbc65c3fb0a	0	0	0	0	75	0	0	243	761	0	0	0	0	12	0	0	7	0	0	15	0	0	49	0	0	0	0	0	0	0	0	0	46	0	0	0	972
fb51f9d8132bea4066ebe3c6795d8e58	0	0	0	0	0	0	0	0	0	0	0	0	0	0	0	0	0	0	0	0	0	0	0	0	0	0	0	128	0	332	1418	15	2	144	0	0	0
e2868005e2d6a75dc771337e530a7457	1999	0	0	0	0	0	0	0	0	0	0	0	0	0	0	0	5	0	0	0	0	0	0	0	0	0	0	0	0	0	0	0	0	0	0	0	8
7142638dce298831882e10d27bd5d063	0	0	0	0	0	0	0	0	0	0	100	162	0	0	0	175	0	32	105	86	0	0	23	1294	0	18	0	0	0	0	0	0	0	0	0	0	0
acc1760d9e6ddc77466b1c8a08cf9111	0	0	0	0	0	0	0	0	0	0	0	0	0	0	1979	0	0	0	0	0	0	0	0	0	0	0	0	0	0	0	0	0	0	0	0	0	0
189810ecd35d20d9d4cd5a63e5af4e83	0	0	0	0	0	148	0	1806	0	0	0	0	0	0	0	0	0	0	0	0	0	0	0	0	0	0	0	0	0	0	0	0	0	0	0	0	0
cdea032c69a959fea018604adbd7a569	0	0	0	0	0	5	0	0	0	0	0	0	0	0	0	0	21	26	0	0	0	30	0	0	0	0	0	4	0	13	1817	13	5	0	0	0	0
165a6aac36dbb69c0ed7d040540a882e	0	0	0	0	0	0	25	4	20	20	1852	0	0	0	0	0	0	0	0	0	0	0	0	0	0	0	5	0	0	0	0	0	0	0	0	0	0
47c9ca7464652811febbb1bdf19d3eab	0	0	0	0	0	0	0	0	0	0	0	0	10	0	8	1899	0	0	0	0	0	0	0	0	0	0	0	0	0	0	0	0	0	0	0	0	0
b50c486dc6f6a95cf0efa80fc7d5270b	352	0	0	5	0	4	0	0	0	0	0	0	0	391	31	0	0	0	0	0	0	39	8	0	0	0	405	9	0	87	0	61	0	0	0	517	0
a4a304dd697cd92d706fb12b203cf91f	1794	25	0	0	0	0	0	10	0	0	0	0	0	0	0	3	0	0	17	23	0	0	0	0	0	0	0	0	0	0	13	0	0	0	0	0	0
7ed94e5cd4c92fb2e02eee664afe5ec3	7	0	0	0	0	0	0	0	17	3	0	0	4	335	488	0	12	2	0	0	159	236	579	8	2	7	0	0	0	0	5	0	0	0	0	0	0
90e4e8ada47f6a44c8c1f618894321d7	0	0	0	0	0	0	0	0	9	0	0	0	0	0	0	0	28	0	0	0	0	0	0	3	0	0	0	0	0	13	1795	0	0	0	0	4	0
dc20e7e87c8eb32e985d0398e730fe93	675	0	60	0	0	0	0	0	0	1030	83	0	0	0	0	0	0	0	0	0	0	0	0	0	0	0	0	0	0	0	0	0	0	0	0	0	0
9a3832e884d0b036c6c674d13087b926	0	0	0	0	0	0	0	0	0	0	0	0	0	0	0	0	0	1843	0	0	0	0	0	0	0	0	0	0	0	0	0	0	0	0	0	0	0
4c0522a6673f359ee9f77159e0d5f24c	0	0	0	0	0	0	0	0	0	0	0	0	0	177	0	0	0	0	0	0	0	120	0	0	0	186	0	0	0	0	0	44	0	0	0	1314	0
03b8ceb1cd5109a6e98d5d9d1e2f69ef	0	0	0	0	0	0	0	0	0	0	0	0	0	0	9	0	10	1820	0	0	0	0	0	0	0	0	0	0	0	0	0	0	0	0	0	0	0
b28d80fa8263a83998f98c8eb0398e1e	0	0	0	0	0	37	0	0	0	0	0	0	0	0	1761	0	0	0	0	0	0	0	0	0	0	0	0	0	0	0	0	0	0	0	0	0	0
70ae38971524476241142126b4a41f9c	38	0	2	5	211	7	27	25	0	957	15	29	0	4	20	8	0	0	0	57	8	21	16	100	2	8	0	0	0	4	23	21	102	60	0	20	3
bc168197aca90b20ec6a2754e23d8bc2	0	0	0	0	0	27	0	0	0	0	0	0	0	0	1741	0	0	0	0	0	0	0	0	0	0	0	0	0	0	0	0	0	0	0	0	4	0
3ba4abd101df6c70018b41875a32c625	0	11	0	0	0	0	0	10	0	0	0	256	0	24	46	0	0	0	110	0	0	87	216	0	0	0	0	0	0	155	0	0	35	0	0	815	0
dd20b848a205e25fd430c3f5a45f4aff	0	82	0	0	0	0	0	0	0	567	0	92	0	0	0	0	0	0	3	0	0	223	0	3	0	2	0	13	0	11	21	18	0	0	0	720	0
d1fd0deb16cbd07e8b3b4eadfe04b15e	0	0	0	0	0	0	0	0	0	0	0	0	0	0	1401	0	43	0	0	0	0	0	0	0	0	0	0	0	0	0	0	0	0	0	0	0	308
ec905f17a37ec5d5589f1e9cfbce12e7	13	0	0	0	5	0	0	0	0	0	0	0	0	0	0	0	0	0	0	0	0	13	0	8	0	32	1673	0	0	0	0	0	0	0	0	0	0
6824dc6fe577acb6f7b8819a715d768d	49	0	0	416	0	0	0	342	0	0	390	0	0	0	17	30	0	0	294	0	19	0	0	99	0	0	0	6	38	14	0	0	0	0	0	0	5
12e794410ce72c05256080aa5728eb4c	0	0	0	0	0	127	0	1533	0	0	0	0	0	0	0	0	0	0	0	0	0	0	0	0	0	0	0	0	0	0	0	0	0	0	0	0	0
80f0e304231eaa8185f79b0ed9f1be7c	0	140	0	30	0	0	0	0	0	0	0	0	0	0	0	0	214	0	0	0	0	0	0	0	57	0	0	0	0	1056	31	116	0	0	0	0	0
b69ee0ca29cdb8e32f097fc309a21681	0	0	0	0	0	0	0	0	19	0	0	0	0	0	0	0	0	1611	0	0	0	0	0	0	0	0	0	0	0	0	0	0	0	0	0	0	0
ee7d661605f1b0f47f6315a808f2f7a6	0	0	0	606	0	0	0	43	0	94	0	0	0	0	0	0	0	0	0	0	6	0	0	0	0	0	864	0	0	0	0	0	4	0	0	0	0
7fd597eb0d629115e969241c7d02a619	0	481	0	0	0	0	0	0	0	0	0	0	0	0	0	0	0	0	0	0	0	0	0	0	1003	0	0	0	0	0	0	101	0	0	0	0	0
5f06bfc05482060034215756ce49e2a5	0	0	0	0	0	0	0	0	0	0	0	0	0	0	0	152	0	0	0	0	0	0	0	1424	0	0	0	0	0	0	0	0	0	0	0	0	0
3bec2ba8d6f4081e2f6de2f7a5198655	0	33	0	200	0	0	0	0	0	0	0	0	0	0	0	0	3	0	0	0	0	0	0	17	0	0	1322	0	0	0	0	0	0	0	0	0	0
4e52725a0c6d04715f6a2e7fc156957e	0	0	0	0	0	0	0	0	0	0	0	0	0	0	0	62	123	0	0	0	0	0	0	0	0	0	0	40	0	0	0	0	0	1108	225	0	0
300ef54e3597be630b6938f155bb37f6	180	0	0	0	0	0	0	0	0	0	0	0	0	1370	0	0	0	0	0	0	0	0	0	0	0	0	0	0	0	0	0	0	0	0	0	0	0
68195b2bd16bdff28af0ecfa12d4b51e	0	0	0	0	0	0	6	0	11	12	1454	0	0	0	0	0	0	0	0	0	0	0	0	0	0	0	2	0	0	0	0	0	0	0	0	0	0
3d19c5a2ed86b558ff0bb2920e608e17	0	0	0	0	3	0	0	5	0	0	1470	0	0	0	0	0	0	0	0	0	0	0	0	0	0	0	0	0	0	0	0	0	0	0	0	0	0
31afb67346fbcfb9cdfcfced4f3e0488	0	0	0	0	0	0	0	0	0	0	0	0	0	0	0	0	0	1469	0	0	0	0	0	0	0	0	0	0	0	0	0	0	0	0	0	0	0
f770fe96f31c58ecffb41ee6920e701b	4	38	0	20	675	0	0	286	0	43	5	0	0	280	9	0	11	52	0	3	4	5	7	0	0	0	0	8	0	0	0	0	12	3	0	0	0
2bf3dbee10ee1c4626713aa92795ea71	0	9	0	0	12	0	945	0	0	0	122	0	6	69	0	220	11	0	0	44	0	0	0	0	0	0	0	0	0	0	0	0	3	0	0	0	0
feddd1b98cbda11cb7102bc0ecbbded7	0	0	0	0	0	0	0	0	0	0	0	0	0	0	0	0	0	0	0	0	0	1191	0	0	0	231	0	0	0	0	0	0	0	0	0	0	0
c70b2a69d387feb9dfed53083008edf8	141	0	0	0	0	28	0	44	0	38	786	0	0	0	4	107	0	0	0	3	0	0	0	0	0	0	0	0	0	0	3	0	24	0	0	0	241
28f4c09f493275cf8d82173bbdbc84cc	0	0	0	0	0	0	0	0	2	0	0	0	0	10	0	0	0	8	0	422	0	0	0	0	0	0	0	10	0	201	682	64	4	16	0	0	0
dd0a98abdfd08809ce8d85c5aca7d186	0	0	0	1410	0	0	0	0	0	0	0	0	0	0	0	0	0	0	0	0	0	0	0	0	0	0	0	0	0	0	0	0	0	0	0	0	0
e01ed63cb8bac2c6c819851faef02cbc	4	750	0	0	0	0	0	0	0	0	0	0	0	0	0	0	0	0	0	0	0	0	0	0	0	0	0	0	0	230	0	404	0	0	0	0	0
ac2f79cb074facd7749a3f8e163390ea	0	0	0	0	0	27	0	0	0	0	0	0	0	0	0	0	0	0	0	0	0	0	0	0	3	0	0	0	0	0	0	0	0	0	3	0	1352
d54c2858b1f98950bfd60e195415217c	99	0	0	27	0	0	0	0	0	235	0	0	0	178	46	0	0	0	0	0	0	201	0	0	0	0	0	0	0	0	0	0	0	0	0	593	0
3fd5ee0ba4abfb54e96fd8a3749a331e	0	0	0	0	47	0	0	0	0	786	0	20	0	6	0	0	0	0	0	25	0	0	0	0	0	0	0	0	0	6	0	0	466	4	0	15	0
f97c6895a70e930de8ba0e96aa8d1151	609	0	0	0	0	0	0	17	0	0	0	0	0	0	0	0	0	0	0	0	0	0	0	0	0	0	0	0	0	44	550	0	0	0	0	0	123
13d8dfb42cb3141c8ce2b4218f0aab57	0	0	0	0	0	0	0	0	0	0	0	0	0	0	0	0	0	0	0	0	0	0	0	0	0	0	0	66	0	0	82	380	320	472	0	0	0
795fd5eb0f34a7d0550ff280d09a21db	1293	0	0	0	0	2	0	3	0	0	0	0	0	0	0	0	0	0	0	0	0	0	0	0	0	0	0	0	0	0	0	0	0	0	0	0	0
9150f3f2520f4f40d668cea1ed0a7e5c	0	0	0	0	0	0	0	0	0	0	0	0	0	0	0	0	0	0	0	1159	0	91	42	0	0	0	0	0	0	0	0	0	0	0	0	0	0
6f8c31dbd5b706df67b6aabea1563898	0	0	7	0	11	0	0	473	8	7	708	0	0	0	0	22	0	0	0	0	0	0	0	0	0	0	0	3	0	0	0	0	0	0	0	0	0
73343179aa81894f8d2c28d4b6ab27c2	0	0	0	0	0	0	0	0	0	0	0	0	0	0	0	1235	0	0	0	0	0	0	0	0	0	0	0	0	0	0	0	0	0	0	0	0	0
3bc9102c426ee2ee09828dc1e6e2fe31	0	0	0	0	0	0	0	0	0	0	0	0	0	0	0	0	5	639	0	0	0	0	0	0	0	0	0	265	0	28	0	228	0	52	0	0	0
6bd31c8fb607c13209c5ee427c78c2c1	0	0	0	0	0	0	0	0	0	1043	147	0	0	0	0	0	0	0	0	0	0	0	0	0	0	2	0	0	0	0	0	0	0	0	0	0	12
60644df542a45fe2b82fd7f984d55f05	16	107	0	0	0	0	3	509	0	61	148	0	0	0	0	0	0	0	157	0	0	33	110	0	0	0	2	5	0	0	0	41	0	0	0	0	0
5d1dcdf09497b703e81d5ee933daa03c	0	0	0	0	167	0	0	0	0	0	0	0	0	0	78	0	0	0	0	0	0	10	0	0	0	0	0	17	0	97	324	8	195	61	0	231	0
ce504ea4c06ec0f40d67477b07f72e98	0	0	0	0	0	0	0	0	1005	0	13	0	0	0	0	13	0	0	0	0	0	0	0	0	0	0	72	0	0	0	0	0	0	0	0	76	0
fba0f77b13ef8ac2b87a100c492f76ba	0	0	0	0	0	0	0	0	0	0	0	0	0	0	0	0	0	0	0	0	0	0	0	202	0	0	0	0	0	0	0	0	0	0	0	973	0
da813a9dfb42a4d9567688d9bf5dab7c	0	0	0	0	0	0	0	0	0	2	1148	0	0	0	0	0	0	0	0	0	0	0	0	0	0	0	0	0	0	0	0	0	0	0	0	0	0
7dfa4203bae0be29b56730203b34203b	0	1150	0	0	0	0	0	0	0	0	0	0	0	0	0	0	0	0	0	0	0	0	0	0	0	0	0	0	0	0	0	0	0	0	0	0	0
3d68b3ed385e816489a0a5fb080383ff	0	0	0	0	0	0	0	0	0	0	0	0	0	0	0	0	0	0	0	0	0	0	0	0	0	0	0	0	0	0	1137	0	0	0	0	0	0
d8ef12bdf2355c7d5577694a493f0ff2	171	3	39	35	0	0	0	0	2	281	124	0	0	7	101	10	18	0	0	12	0	24	0	27	0	6	6	42	0	7	0	0	74	0	0	0	120
8b55ccb37d7be297893c57840544c6db	0	0	0	0	0	0	0	0	0	0	0	0	0	0	0	0	0	0	0	0	0	0	0	0	0	0	0	0	0	0	0	0	1095	0	0	0	0
407cb1a5b90da56b51d4f1ee8cb29c2a	0	744	0	0	0	0	0	0	0	0	0	0	0	0	0	0	0	0	0	0	0	274	0	0	54	0	0	0	0	14	0	0	0	0	0	0	0
8fd521c8261e98494b1346f3010b0cf8	0	0	0	0	0	0	0	21	1023	0	0	0	0	0	0	27	0	0	0	0	0	0	0	0	0	0	0	0	0	0	0	0	0	0	0	0	0
296c393cc8e490e137c8c20beeaa006a	0	0	0	0	0	56	0	0	0	0	0	0	0	0	1005	0	0	0	0	0	0	0	0	0	0	0	0	0	0	6	0	0	0	0	0	0	0
b308f9244ae63d0a11ac4307969c2b60	0	0	0	9	978	0	0	0	0	0	0	0	0	0	0	0	0	0	2	3	0	0	0	0	0	0	0	0	0	13	0	0	43	0	0	13	0
bc01699c8b40ed8eb2724c3383e05f1f	0	0	0	0	0	0	0	0	0	0	0	0	0	0	0	0	0	0	0	0	0	0	0	0	0	0	0	0	0	0	0	0	0	0	0	0	1059
77099473d0cda3e8462d80d459f5e836	5	237	0	290	0	0	0	3	0	0	0	0	0	0	0	0	153	30	0	13	39	44	0	0	140	0	0	0	38	59	0	0	0	0	0	0	0
26d98efa38e835733f817b6900d10ed7	0	256	0	0	0	0	0	0	0	0	0	0	0	0	0	0	0	0	0	0	0	0	0	688	104	0	0	0	0	0	0	0	0	0	0	0	0
d1abb5ebadbf4d36c095436a372a9504	0	0	0	0	0	0	0	0	0	0	0	98	0	0	0	0	0	0	0	814	0	0	0	0	0	0	0	0	0	0	0	0	120	0	0	0	0
1bda77b0c60ef691abbab76a68c1f54a	0	664	0	0	0	0	0	0	0	0	0	0	0	0	0	5	0	0	0	0	0	0	0	0	304	0	0	0	0	50	0	9	0	0	0	0	0
5fa13ee7e38b2a9fa1ca95e56be37fa2	0	0	0	0	941	78	11	0	0	0	0	0	0	0	0	0	0	0	0	0	0	0	0	0	0	0	0	0	0	0	0	0	0	0	0	0	0
ad0140e97b44feba274a4dc4ac374781	0	0	0	0	0	15	0	5	0	3	996	0	0	0	0	0	0	0	0	0	0	0	0	0	0	0	0	0	0	0	0	0	0	0	0	0	0
10c70ded52a37d720b203b541612151c	0	37	0	0	0	0	0	0	0	0	0	0	0	0	0	0	0	0	0	0	0	0	0	0	0	980	0	0	0	0	0	0	0	0	0	0	0
57eba064f932cfab25dce97175da4a59	64	0	0	0	0	0	0	0	0	0	39	0	0	602	0	0	0	128	0	0	0	0	0	182	0	0	0	0	0	0	0	0	0	0	0	0	0
5521a59a03a3fb85070cd7f1a42d3119	0	664	0	82	0	0	0	0	0	0	0	0	0	0	0	0	83	0	0	0	0	0	0	0	185	0	0	0	0	0	0	0	0	0	0	0	0
b129218365b31707690c3a3b28153785	0	0	0	0	6	0	0	0	0	0	0	0	0	0	0	882	0	0	0	77	0	0	0	0	0	0	37	0	0	0	0	0	0	0	0	0	0
e385412bd14820e413da7b314095d37a	0	0	0	0	0	0	0	0	0	0	0	0	0	0	985	0	0	0	0	0	0	0	0	0	0	0	0	0	0	0	0	0	0	0	0	0	0
fa69340ab61564b3684683e8f3697186	0	0	0	0	0	0	0	0	0	665	0	0	0	4	4	0	0	0	0	15	0	0	17	0	0	0	0	0	0	47	4	0	137	53	0	2	24
590e63c2c65c2e59996bfda15420e4c1	0	0	0	0	0	0	0	0	0	0	0	277	0	0	0	0	0	0	0	0	0	0	0	0	0	0	0	0	0	0	0	0	0	0	0	0	690
5601d2aa3c8cd239945113d8e02a5174	10	0	0	0	0	0	0	3	0	3	294	0	2	74	0	0	4	0	0	0	255	4	22	0	0	0	87	0	0	6	0	177	5	19	0	0	0
a5e4c6532a4e3d1e11ce0dcfd13bc74c	0	0	0	0	0	0	0	0	0	105	12	0	0	7	0	0	0	0	0	0	0	0	0	0	0	0	0	0	0	0	3	0	811	0	0	12	0
e9cde19e7a13079e7cb0c0c8f0bfdf55	0	19	0	0	90	269	5	0	5	31	0	0	0	0	0	141	0	0	0	311	0	0	0	0	0	0	0	0	0	0	0	6	59	0	0	0	0
c08ebeb79efbc96a3b66813b8f3dd94b	0	922	0	0	0	0	0	0	0	0	0	0	0	0	0	0	2	0	0	0	0	0	0	0	0	0	0	0	0	0	0	0	0	0	0	0	0
98238cfa36cdc70614402e117028d844	43	6	20	0	0	0	0	2	0	0	93	123	0	15	166	0	0	0	15	59	0	9	4	110	0	4	0	0	0	0	42	3	175	0	0	28	0
4d43196088f41c206f88b842f641b70c	0	0	0	137	0	0	0	0	0	0	0	0	0	0	0	0	206	0	0	0	0	0	0	0	0	0	0	0	0	38	533	0	0	0	0	0	0
92ebf53bfc082ca5302e844ee6b3fbd0	826	6	0	0	0	0	0	10	0	0	51	0	0	0	0	0	0	0	0	0	0	0	0	0	0	0	0	0	0	0	0	0	0	0	0	0	4
f923880831339af80d20ac110238fd35	0	0	0	0	0	0	0	0	0	0	0	0	0	0	0	0	0	0	0	173	0	109	0	0	0	0	0	0	0	0	450	106	0	50	0	0	0
bf2582da2585dea4d49816b0b6de19f6	0	0	4	0	0	0	0	0	0	0	0	0	0	3	0	0	0	0	0	0	0	0	7	0	0	0	0	0	0	0	76	2	756	9	0	0	31
3959b31a9b758960996ec3dd1574ee59	0	0	0	0	0	0	0	0	0	0	0	0	0	0	2	0	51	0	0	0	0	0	0	0	0	0	0	0	0	0	827	6	0	0	0	0	0
b2a24a61ef1fbaf2506cfe1f00dc9abd	0	0	0	0	0	0	0	0	2	0	8	0	0	4	324	0	0	0	0	0	0	24	67	0	0	0	0	28	0	0	415	0	0	0	0	0	0
83649afef6dc470ff3147d7dd3ff7bba	343	7	6	0	0	0	0	6	22	0	3	24	0	240	0	22	0	0	8	16	0	0	0	24	0	29	32	0	0	9	10	0	51	6	0	0	8
47252151436f0076b0be49ce5e66664b	0	0	0	109	0	0	0	135	0	0	401	0	0	0	0	122	0	0	0	0	0	0	0	0	0	0	0	0	90	0	0	0	0	0	0	0	0
4e7a968dff82060ab09dd3498de6fe56	0	0	0	30	0	0	0	0	0	0	0	0	0	0	0	0	483	0	0	0	0	0	0	0	0	0	0	0	0	67	40	229	0	0	0	0	0
0825d34a00fad1ac3b10bac6078fc53a	0	760	0	0	0	0	0	15	14	0	0	0	0	0	0	0	0	0	8	0	0	9	17	0	5	0	0	0	0	0	0	9	0	0	0	0	0
70d2492bf24f008246b24c2e72c434f2	0	0	0	0	0	0	0	0	822	0	0	0	0	0	0	10	0	0	0	0	0	0	0	0	0	0	0	0	0	0	0	0	0	0	0	0	0
aac0b0f64b20b89d087b55b9eefe5d17	0	218	0	0	0	0	0	0	0	0	0	0	0	0	0	0	0	0	0	0	0	0	0	0	609	0	0	0	0	0	0	0	0	0	0	0	0
e0052e0ddb394b1c18890d9bd4da39d3	0	0	0	0	0	0	0	500	0	0	0	0	0	0	326	0	0	0	0	0	0	0	0	0	0	0	0	0	0	0	0	0	0	0	0	0	0
cb2b9ac1df6c15e329072754bab9d174	0	0	0	0	0	0	0	0	0	0	0	0	0	0	0	0	0	0	0	298	0	0	0	450	0	0	0	0	0	0	0	0	0	0	0	78	0
b63ba3d232787b108d1c1cf7c4039f62	0	0	0	0	0	0	0	0	0	0	0	0	0	0	0	0	0	0	0	0	0	0	0	0	0	0	0	0	0	0	0	0	0	0	0	825	0
b352fdf358f88c5b6ddc83e6fb5b77d1	0	0	0	825	0	0	0	0	0	0	0	0	0	0	0	0	0	0	0	0	0	0	0	0	0	0	0	0	0	0	0	0	0	0	0	0	0
9d0c07b3c22898589e88ed28a7cc00c6	34	0	0	0	0	0	0	0	0	0	0	0	0	0	782	0	0	0	0	0	0	0	0	0	0	0	0	0	0	0	0	0	0	0	0	0	0
aabdf5453518a6276d84c6e8d256964d	0	0	0	0	0	0	0	0	0	0	0	0	0	0	0	0	0	0	0	0	0	0	0	0	0	0	0	0	0	0	0	781	0	0	0	0	0
07646de58d50366acecc9b102ffdfe62	0	0	0	0	0	0	0	0	0	0	0	0	0	0	0	0	0	0	0	0	0	38	0	0	0	0	0	254	0	64	24	329	0	63	0	0	0
083113e22077e462a57c5603e9a0118e	51	698	0	0	0	0	0	0	0	0	0	0	0	0	0	0	0	0	0	0	0	0	0	0	0	0	0	0	0	0	0	20	0	0	0	0	0
0fe579f834e894b63c265a826a34e90e	0	0	0	0	0	0	0	0	0	0	0	0	0	0	0	0	0	127	0	0	0	18	0	0	0	0	0	484	0	0	0	95	5	32	0	0	0
01b1ceee5121be1c757610cf65399bd7	0	0	0	369	0	0	0	0	0	0	0	63	0	0	0	0	0	0	61	38	0	0	0	133	0	92	0	0	0	0	0	0	0	0	0	0	0
74035b14738542e6ba4bc238c8e34aa0	0	0	0	0	0	0	0	0	0	0	0	0	0	0	0	0	0	0	0	0	0	0	0	0	0	0	0	0	0	482	0	271	0	0	0	0	0
53172ffbe2f7e25e53d31578a207d28c	23	692	0	0	5	0	0	9	0	0	0	0	0	0	0	0	0	0	0	0	0	0	0	0	0	0	0	0	0	0	0	22	0	0	0	0	0
f3592209021de30c202f2ddcf4cf380d	0	0	0	0	0	0	0	0	0	0	0	0	0	0	0	0	0	741	0	0	0	0	0	6	0	0	0	0	0	0	0	0	0	0	0	0	0
20943a52bbc1df18883bf83a5e338e2e	0	0	0	0	0	0	0	0	0	0	0	0	0	43	699	0	0	0	0	0	0	0	0	3	0	0	0	0	0	0	0	0	0	0	0	0	0
1dfdcd7db65f345b41fbdf1d04386565	0	0	0	0	0	0	731	5	2	0	2	0	0	0	0	0	0	0	0	0	0	0	0	0	0	0	0	0	0	3	0	0	0	0	0	0	0
a873dc1fa39467056074c83732dacf03	0	0	0	0	0	0	0	0	0	0	0	0	0	0	4	735	0	0	0	0	0	0	0	0	0	0	0	0	0	0	0	0	0	0	0	0	0
6c860416cab56236b29b0cdaaa91d83b	0	0	0	0	0	0	0	0	0	0	0	0	737	0	0	0	0	0	0	0	0	0	0	0	0	0	0	0	0	0	0	0	0	0	0	0	0
45bb9f8f560a90fca6925f1aea91c4ca	0	216	0	0	0	0	0	0	0	0	0	0	0	0	0	0	0	0	0	0	0	0	0	0	440	0	0	0	0	0	0	78	0	0	0	0	0
0072b0040e39e5d64afc5038682721dc	0	0	0	0	15	0	0	0	0	689	0	0	0	0	0	0	0	0	0	18	0	0	0	0	0	0	0	5	0	0	0	0	0	0	0	0	0
30636fa5367238cd02d73cd517f961e2	0	364	0	79	0	0	0	0	0	0	89	0	0	0	0	0	0	0	0	0	0	0	0	0	110	0	0	0	0	0	0	84	0	0	0	0	0
35e272efeb96313a770f6c2bf4767958	0	0	0	0	0	0	0	0	0	0	0	0	0	0	0	0	0	0	0	0	0	0	0	0	0	0	0	714	0	0	0	0	0	0	0	0	0
e748f8c053b12d3a015e5468764aaf13	0	0	0	0	0	0	0	0	0	0	0	0	0	0	0	0	0	0	0	0	0	43	0	0	0	0	0	0	0	0	0	0	0	0	0	669	0
c5454c390530c09b266fa5a41857d022	0	0	0	0	74	0	0	0	0	627	0	0	0	0	0	0	0	0	0	0	0	0	0	0	0	0	0	0	0	0	7	0	0	0	0	0	0
01135f1bce2aaaf8f7f62ad56aac13d1	0	0	0	0	0	0	0	0	0	0	0	0	0	0	0	0	0	708	0	0	0	0	0	0	0	0	0	0	0	0	0	0	0	0	0	0	0
6f4f2eb49ad8822c7b76fed6a14b5c0f	0	129	0	0	0	0	0	0	0	0	0	0	0	0	0	0	0	0	0	0	0	0	0	0	569	0	0	0	0	0	0	0	0	0	0	0	0
aa787bbc89270cb0233041be06aac930	0	0	156	0	0	0	0	0	0	0	41	0	0	0	0	0	0	0	0	0	0	199	0	0	0	0	0	0	0	0	147	0	56	91	0	0	0
5baefeccd6de47857c706c71816042f5	0	0	0	0	0	0	0	0	0	0	13	0	665	0	0	0	0	0	0	0	0	0	0	0	0	0	0	0	0	0	0	0	0	0	0	0	0
d92f690a93571ba91e9db7ea3bb80f0e	0	0	0	0	0	0	0	0	0	0	0	0	0	0	0	0	0	0	0	0	0	0	0	0	0	0	0	0	0	0	576	93	0	0	0	0	0
f6e6f061d5be8872fb37900b1f636969	0	168	0	3	0	0	0	127	4	76	0	0	0	0	0	0	0	0	132	0	0	0	0	0	0	0	0	149	0	0	8	0	0	0	0	0	0
1fc7953ef6cfd50578e672bde9331864	0	0	0	0	0	0	0	0	0	0	0	0	0	0	0	0	0	8	0	0	0	25	0	0	0	0	0	0	0	77	494	12	36	0	0	0	15
c2b34c211b201a5efb4e0a120f0c6f1e	174	0	0	0	0	18	0	35	0	37	13	0	0	0	0	0	0	0	0	0	7	0	0	85	0	177	0	6	0	0	61	0	0	0	0	0	50
d777bbaa70de5ae5aed5d5f715ce0201	0	403	0	0	0	0	0	0	0	0	0	0	0	0	0	0	0	0	0	0	0	0	0	0	90	0	0	0	0	75	0	94	0	0	0	0	0
56c5cce4fbe952ce31e659923fa9ccd2	0	0	0	0	0	0	0	0	0	0	0	0	0	0	0	0	0	0	0	597	0	3	19	0	0	0	0	0	0	28	0	0	2	0	0	0	0
887262052925adff29fc62ac15430247	0	147	0	0	0	0	0	0	0	0	0	0	0	0	0	0	0	0	0	0	0	0	0	0	492	0	0	0	0	0	0	0	0	0	0	0	0
7111e9ed73f0dd5beffc3a8d0f9bc8f1	0	0	0	0	0	20	606	13	0	0	0	0	0	0	0	0	0	0	0	0	0	0	0	0	0	0	0	0	0	0	0	0	0	0	0	0	0
28b8656c9d9c6134806eeea9b34480aa	31	3	53	5	0	26	0	0	0	0	202	0	0	26	0	56	24	0	0	101	0	0	0	0	0	3	0	0	0	7	0	0	0	0	0	0	96
aa8d20f08616b380e3d4bb820afc8d30	0	0	0	0	0	0	0	0	0	0	0	0	0	0	29	0	591	7	0	0	0	0	0	0	0	0	0	0	0	0	0	0	0	0	0	0	0
d3c65ab1501a86ca5964202f6708aad1	0	139	0	0	0	0	0	0	13	0	0	0	0	0	0	0	0	0	0	0	0	0	0	0	412	0	0	0	0	18	0	42	0	0	0	0	0
af0ed7564241d8fa41b8738a049bee9c	0	0	85	0	0	0	537	0	0	0	0	0	0	0	0	0	0	0	0	0	0	0	0	0	0	0	0	0	0	0	0	0	0	0	0	0	0
912cc268bddff07db28b693030ff2fa8	0	0	0	23	0	0	0	595	0	3	0	0	0	0	0	0	0	0	0	0	0	0	0	0	0	0	0	0	0	0	0	0	0	0	0	0	0
e5abe65d5933451ca7c19fb234b441b3	0	0	0	0	0	0	0	0	0	54	0	0	0	10	0	0	0	0	0	0	0	2	0	0	0	0	511	0	0	0	4	0	0	38	0	0	0
a92482b3c9f5b49921b1db8d95a661ee	19	9	15	3	6	23	10	5	31	11	14	19	5	8	14	8	8	7	7	5	7	35	15	34	62	8	8	33	10	7	45	65	13	11	6	11	21
9745d5286450b331327a26846a8daa2b	0	0	0	0	0	0	0	0	0	0	0	0	0	0	0	0	0	0	0	0	0	0	0	0	0	0	0	21	0	0	0	0	593	0	0	0	0
fcab9549be68d70c46a736b8db43c1f2	0	0	0	0	0	0	0	0	0	0	0	0	0	0	0	0	0	0	0	0	0	0	0	0	0	0	0	600	0	0	5	0	6	0	0	0	0
eb1cd3de47b35c9b985da94607826002	0	0	0	0	0	0	0	0	0	0	0	0	0	0	544	0	0	0	0	47	0	0	0	0	0	0	0	0	0	0	6	0	13	0	0	0	0
bdb452c1d25a85babbeefd03c5aac58b	0	96	0	0	0	0	0	0	0	87	0	0	0	0	68	0	0	0	0	0	0	175	0	0	0	0	0	0	0	0	74	0	110	0	0	0	0
724cd5f4b787aca4dae2483000c4ef9c	12	544	0	0	0	0	0	0	0	0	0	0	0	0	0	0	0	0	0	0	0	0	0	0	25	0	8	0	0	0	0	20	0	0	0	0	0
f6f307163b29d35f375578fc30a2a199	85	0	0	0	0	0	346	168	0	0	0	0	0	0	0	0	0	0	0	0	0	0	0	0	0	0	0	0	0	0	0	0	0	0	0	0	0
ed5f294f08fae6d937f2a076517ca026	0	0	0	0	0	0	0	0	0	0	0	0	2	0	597	0	0	0	0	0	0	0	0	0	0	0	0	0	0	0	0	0	0	0	0	0	0
de43a1b0de87aea6dc906eb4e489578b	0	0	0	0	0	0	0	129	470	0	0	0	0	0	0	0	0	0	0	0	0	0	0	0	0	0	0	0	0	0	0	0	0	0	0	0	0
7fdc39f7ca25e2c4c5ba0651b99a2930	0	0	5	0	0	8	4	0	4	0	569	0	0	0	0	0	0	0	6	0	0	0	0	0	0	0	0	0	0	0	0	0	0	0	0	0	0
904d67513c2762825bbe7be6a735e25e	0	0	0	0	0	0	204	0	0	0	221	4	0	142	0	0	0	13	0	0	0	0	0	3	0	0	0	0	0	4	0	0	0	0	0	0	0
7b1ac930f6b5a1a1b62ea9b8378ce979	0	0	0	0	0	21	0	6	3	4	553	0	0	0	0	0	0	0	0	0	0	0	0	0	0	0	0	0	0	0	0	0	0	0	0	0	0
815a334b6197c1c1a25699cde552df0b	0	0	0	0	0	0	0	0	0	0	0	0	0	0	0	0	0	0	0	0	0	0	0	0	0	0	0	0	0	0	542	43	0	0	0	0	0
8047ac17a48e3869109bfe3249b24d0a	0	192	0	0	0	0	0	0	0	0	0	0	0	0	0	0	0	0	0	0	0	0	0	0	331	0	0	0	0	0	0	58	0	0	0	0	0
5e54c12062827f307e4faba9f1ffb2de	0	0	0	0	0	0	0	0	579	0	0	0	0	0	0	0	0	0	0	0	0	0	0	0	0	0	0	0	0	0	0	0	0	0	0	0	0
c0cb20f7e7a30d6e5de23eaf4740ee4b	0	0	0	0	0	0	6	0	0	572	0	0	0	0	0	0	0	0	0	0	0	0	0	0	0	0	0	0	0	0	0	0	0	0	0	0	0
642576435617c3a0106430eb1eeb4db4	0	0	0	0	48	0	0	0	0	184	0	0	0	0	0	0	0	0	4	0	0	0	13	0	0	0	0	11	0	7	215	0	24	16	0	0	56
9fd9f925a7527fe4e836dd6165e5dda9	0	182	0	0	0	0	0	0	0	0	0	0	0	0	0	0	0	0	0	0	0	0	0	0	391	0	0	0	0	0	0	0	0	0	0	0	0
c35a8f7c6e13ecd4c77e4c4e5e9fc9a1	0	0	0	0	0	0	0	0	0	0	0	0	557	0	0	13	0	0	0	0	0	0	0	0	0	0	0	0	0	0	0	0	0	0	0	0	0
36da588da0dc86110c9f6712c5a4de2e	0	0	0	0	0	0	0	0	0	0	0	2	0	0	0	0	0	28	0	0	0	0	0	0	0	16	0	452	0	60	0	8	0	0	0	0	0
b625302743848389927cc37d896980bb	36	31	0	0	0	0	0	48	65	202	16	0	0	0	0	0	4	0	119	0	0	0	0	0	0	0	0	0	0	0	0	0	0	11	0	0	33
1ec76dbf6deced6756281d647141a7de	0	0	0	0	0	0	0	0	0	0	0	0	0	2	0	0	0	0	0	0	0	0	0	0	0	0	0	0	0	8	511	0	32	0	0	3	0
3d10dfefbf9c54f85692b44adac8a757	0	123	0	0	0	0	0	0	0	0	0	0	0	0	0	0	0	0	0	0	0	0	0	0	432	0	0	0	0	0	0	0	0	0	0	0	0
67cbea6f22aa4fa50b703702b884166f	0	552	0	0	0	0	0	0	0	0	0	0	0	0	0	0	0	0	0	0	0	0	0	0	0	0	0	0	0	0	0	0	0	0	0	0	0
e07cf1a527fdc27528e6ddb43f2be054	0	0	0	0	0	0	0	0	0	0	0	0	0	0	0	0	0	0	0	0	0	0	0	0	0	0	179	192	179	0	0	0	0	0	0	0	0
75a1e1f6ae108a996d34bc9de91fd145	0	0	0	0	0	0	0	0	0	0	7	0	0	0	0	0	0	0	0	0	0	0	0	0	0	0	543	0	0	0	0	0	0	0	0	0	0
4c3ca1f475ec152da52ff7171c023118	0	0	0	0	0	0	0	0	0	257	0	0	0	0	0	0	0	0	0	0	0	0	0	0	0	0	0	0	0	0	0	0	0	0	0	0	293
c764a15f29564d2f09f6b625ca14040d	87	0	30	0	0	0	0	4	0	0	20	6	0	0	97	19	17	0	0	13	0	9	5	11	0	0	0	12	0	0	0	0	22	0	0	0	197
40db79b650d8f39776b18a03076cc8c3	0	97	0	0	0	0	0	0	0	0	0	0	0	0	0	0	0	0	0	0	0	0	0	0	0	0	439	2	0	0	0	9	0	2	0	0	0
4dbe3bdab41aeec79e52c78c1281615d	68	0	0	0	335	0	0	0	0	0	0	0	0	0	0	0	0	0	0	21	0	0	0	0	0	0	0	0	0	0	0	0	0	0	0	0	124
4a75ff0bae5bda54eea0477cd9facd33	0	0	0	0	487	0	0	10	0	0	48	0	0	0	0	0	0	0	0	0	0	0	0	0	0	0	0	0	0	0	0	0	0	2	0	0	0
f469885205f18026a5f55293488bef73	545	0	0	0	0	0	0	0	0	0	0	0	0	0	0	0	0	0	0	0	0	0	0	0	0	0	0	0	0	0	0	0	0	0	0	0	0
3fb99026d76b06a70f3650c165372c10	0	0	0	0	0	0	0	0	0	0	0	0	0	0	0	0	0	80	0	0	0	0	0	0	0	0	0	0	0	436	0	22	0	0	0	0	0
53dfd38f3777ac1b1054742bf4eded39	0	0	0	0	0	0	0	0	0	0	0	0	0	0	0	537	0	0	0	0	0	0	0	0	0	0	0	0	0	0	0	0	0	0	0	0	0
3d5f5611c91cec1283f7a65c342c6bf2	0	105	0	91	0	0	0	0	0	0	0	0	0	0	0	0	0	0	0	0	0	0	0	0	304	0	0	0	35	0	0	0	0	0	0	0	0
e771803c95baaf4cf664fd6daf7469ef	246	0	0	0	0	0	0	13	0	68	0	0	0	33	0	0	0	0	0	0	0	0	0	0	0	73	0	0	0	0	72	0	28	0	0	0	0
deeb8fce93f7c3db50d0e29dab7e95a8	0	0	0	0	0	0	0	0	0	533	0	0	0	0	0	0	0	0	0	0	0	0	0	0	0	0	0	0	0	0	0	0	0	0	0	0	0
b14d2094749b31b6ef0050023fb662cc	0	0	0	0	0	0	0	0	0	0	0	0	0	97	0	0	0	0	0	0	0	222	0	0	0	0	0	94	0	98	22	0	0	0	0	0	0
018a5f2a28501ad16186ae2b04e55818	0	0	0	0	0	0	0	0	0	525	2	0	0	0	0	0	0	0	0	0	0	0	0	0	0	0	0	0	0	0	0	0	0	0	0	0	0
86a140234a0e8afb8eb40abfa9684f6f	0	0	0	189	0	0	0	29	0	0	0	26	0	0	0	0	0	0	34	22	0	0	0	151	0	70	0	0	0	0	0	0	0	0	0	0	0
e3e7de0ee1f216782b6881bb92497ff7	21	2	0	26	11	0	14	37	17	27	36	0	9	9	7	9	4	16	0	20	16	0	0	21	24	44	8	0	0	10	25	18	39	14	10	13	11
df2f9399e80bea8413f73823459b1812	425	0	0	0	0	0	0	6	0	0	0	0	0	0	0	0	0	0	0	0	0	0	0	0	33	0	0	0	0	0	0	0	0	0	52	0	0
0555c2fe43777aca91b6a033b839e949	0	0	0	0	0	0	0	0	0	0	0	0	0	0	0	0	0	242	0	0	0	0	0	3	0	0	0	0	0	0	0	269	0	0	0	0	0
c68e963b2bf8cb4049615610e6e7a588	0	0	511	0	0	0	0	0	0	0	0	0	0	0	0	0	0	0	0	0	0	0	0	0	0	0	0	0	0	0	0	0	0	0	0	0	0
c723f4e097c7dce7dbbaac5034359b56	0	0	0	0	0	0	0	0	508	0	0	0	0	0	0	0	0	0	0	0	0	0	0	0	0	0	0	0	0	0	0	0	0	0	0	0	0
b2e2a8c772644d48849edcfa03547577	0	0	0	0	0	0	0	0	0	0	0	0	0	0	0	0	0	0	0	0	0	0	0	0	0	0	0	0	0	0	0	0	0	0	0	0	506
fad5dc9c6d3b3773e1963652720479d2	0	0	0	0	0	0	0	0	0	0	0	0	0	0	0	0	0	0	0	0	0	0	0	0	0	0	498	0	0	0	0	0	0	0	0	0	0
56aa91b83f97f0e967295d3f17554ed5	0	0	0	0	92	0	0	0	0	0	0	0	0	0	65	0	336	0	0	0	4	0	0	0	0	0	0	0	0	0	0	0	0	0	0	0	0
ed75f8c3a03233d82815e00a273ee096	0	0	0	0	0	0	0	0	0	0	0	0	0	0	0	0	0	0	0	0	0	0	0	0	0	0	0	0	0	430	0	64	0	0	0	0	0
71930e5e0c1cbc9d899cdcd6f8365444	0	242	0	0	0	0	0	0	0	0	0	0	0	0	0	0	0	0	0	0	0	0	0	0	0	0	0	0	0	0	0	251	0	0	0	0	0
59569c4a3d61e9f751a9c7b5681fa172	0	0	0	0	489	0	0	0	0	0	0	0	0	0	0	0	0	0	0	0	0	0	0	0	0	0	0	0	0	0	0	0	0	0	0	0	0
401858e86ab7a103e59bad7d50b62a55	0	0	0	0	0	0	0	0	0	0	0	0	0	0	0	0	0	0	0	0	0	0	0	0	0	0	0	0	0	71	0	418	0	0	0	0	0
2e79e5a2e94656d9bd88a94c9da3bf76	0	0	8	0	0	0	0	0	0	0	0	111	0	2	2	0	0	0	0	279	0	0	0	0	0	71	0	0	0	0	16	0	0	0	0	0	0
819cdc81988b6a0913ad832ec80b2ebf	0	0	0	0	0	0	0	0	0	0	486	0	0	0	0	0	0	0	0	0	0	0	0	0	0	0	0	0	0	0	0	0	0	0	0	0	0
1736539d886a23c39a4cced7f5a5308f	0	0	0	0	15	5	0	0	0	23	0	0	0	26	12	0	0	0	0	3	0	0	0	0	0	0	0	0	0	0	361	0	0	0	0	0	41
65e8c8d5d0c788e30dfb79b092e642ff	0	0	0	0	0	0	0	0	0	0	485	0	0	0	0	0	0	0	0	0	0	0	0	0	0	0	0	0	0	0	0	0	0	0	0	0	0
15285d29dd6e76177f2c4acc13ae6a45	0	0	0	0	0	0	0	0	0	0	0	0	0	0	0	0	0	0	0	0	0	0	0	0	0	0	0	0	0	0	484	0	0	0	0	0	0
a0c81eef041a2baca027f2559e529799	0	0	2	0	0	0	0	4	452	0	0	0	0	0	0	0	0	0	0	0	0	0	0	0	0	0	0	0	0	0	0	25	0	0	0	0	0
70dfc7596db07ebd4b71096db27e690a	0	0	0	0	0	0	0	0	0	0	0	0	0	0	0	0	0	0	0	0	0	0	0	0	0	0	0	0	0	0	0	0	0	0	0	478	2
77ca19db84cba5f102e991eeadf5cb0c	0	6	0	0	0	0	0	0	0	0	0	0	0	0	0	0	0	0	0	0	0	0	0	0	0	0	468	0	0	0	0	0	0	0	0	0	0
5671ec779e7618842191999645e64be4	86	0	0	0	0	0	0	0	0	51	0	0	0	56	0	0	0	0	12	0	0	93	0	0	0	0	0	0	0	0	0	0	11	0	0	165	0
3486567651b044204dd4da66a8785a4e	0	0	0	0	0	0	0	0	0	0	0	0	0	0	0	0	0	0	0	0	0	105	364	2	3	0	0	0	0	0	0	0	0	0	0	0	0
dd7348b0e9781a2c17eca3138ba3f3a5	0	0	0	0	0	0	0	0	0	473	0	0	0	0	0	0	0	0	0	0	0	0	0	0	0	0	0	0	0	0	0	0	0	0	0	0	0
2699376f4dd5f5ca7d7fdddcd3253bbc	0	0	0	0	0	0	0	0	0	0	0	0	0	0	0	0	0	0	0	0	0	0	0	0	0	0	0	0	0	0	0	0	472	0	0	0	0
030cfc500388803d6da0bc38a3c377bd	0	0	0	0	0	0	0	0	0	0	0	471	0	0	0	0	0	0	0	0	0	0	0	0	0	0	0	0	0	0	0	0	0	0	0	0	0
46a7f5aa91c7d148527251f04038f1b8	0	0	0	0	0	0	0	0	0	0	24	0	0	0	0	0	0	0	88	0	0	0	0	182	0	0	0	0	0	0	0	0	58	0	0	118	0
4c7980c73e6eeac05a590e4078cafd31	0	0	0	0	0	0	0	0	0	0	0	0	0	0	0	0	0	0	0	0	0	0	0	0	0	0	462	0	0	0	0	0	0	0	0	0	0
4b90688d78aa471927bc76c8af08efd6	0	0	0	0	0	0	0	0	0	0	0	0	0	27	0	0	0	0	0	0	0	181	0	0	0	0	0	79	0	101	74	0	0	0	0	0	0
6d54b936cb86ae6149c15881552783df	0	0	0	0	0	0	0	0	0	4	456	0	0	0	0	0	0	0	0	0	0	0	0	0	0	0	0	0	0	0	0	0	0	0	0	0	0
62457459b6e0747d7087876a6f5036e1	0	0	0	0	13	0	0	0	0	344	0	0	0	0	0	0	0	0	0	0	0	0	36	0	0	0	0	0	0	4	0	0	63	0	0	0	0
71d3e349e229fa6ccc1ec681f676bdea	0	0	0	0	0	22	0	0	0	0	7	0	0	0	0	15	24	22	0	0	0	240	0	0	0	0	0	0	0	27	0	95	0	0	0	5	0
5e18ed2785c8c2cf2891e7603e933ae1	0	0	0	0	0	0	0	0	0	0	0	0	0	373	0	0	0	0	0	0	0	0	0	0	0	0	0	0	0	0	0	0	0	0	0	82	0
2a1941cf388b27ed8cec301bed3f3ce5	0	0	0	0	0	0	0	0	0	0	0	0	0	0	0	0	0	0	0	0	0	0	0	0	0	0	0	352	0	38	39	26	0	0	0	0	0
25a299b2b05b88690190287faa3967d9	0	0	0	122	0	0	0	0	0	0	0	0	0	15	0	0	0	63	0	0	0	0	0	0	0	0	0	181	0	0	45	28	0	0	0	0	0
bc1ef60505205d9a15acc72f3eaac406	0	0	0	0	0	0	0	0	0	0	0	0	0	0	0	0	0	0	0	0	0	0	0	0	0	0	0	450	0	0	0	0	0	0	0	0	0
f43af13429d378453e7d42569216a550	0	12	0	13	0	7	0	28	23	29	19	0	0	0	11	0	0	23	0	18	15	15	0	36	30	31	17	6	0	0	32	23	29	11	0	12	4
03a8fe6fde390ffff75f896fa73f2b39	18	0	153	0	0	0	0	16	0	0	140	0	0	15	0	26	0	0	0	47	0	0	0	0	0	0	0	0	0	0	0	0	0	0	0	0	29
40ef1c925f0d5599ce838d3c14ba6979	0	0	0	0	0	0	0	0	0	0	0	0	0	0	0	0	0	0	0	0	0	0	0	0	0	0	0	0	0	0	370	0	72	0	0	0	0
44a628fad090c978cee42b7db4754501	137	0	0	0	0	0	0	0	0	0	0	38	0	16	0	0	0	0	0	0	15	30	0	0	28	0	0	47	0	0	0	0	38	0	0	28	64
9e179af7887fdb6bbc9d1b23f9c99879	0	0	0	0	0	0	0	0	0	0	0	0	0	0	0	0	0	28	0	0	0	0	0	0	0	0	0	0	0	0	163	0	97	152	0	0	0
3665058618eb2776a8f7e2890dd37b64	0	0	0	0	0	0	0	0	0	0	0	0	0	0	0	0	0	0	0	0	0	0	0	0	0	0	0	415	0	0	0	13	0	7	0	0	0
92019185767aabb608ec487f05ac5a89	423	0	5	0	0	0	0	5	0	0	0	0	0	0	0	0	0	0	0	0	0	0	0	0	0	0	0	0	0	0	0	0	0	0	0	0	0
cf88492848f11fd8880a7e00d776354c	0	0	0	0	0	0	0	0	0	0	0	0	0	0	0	0	0	0	0	282	148	0	0	0	0	0	0	0	0	0	0	0	0	0	0	0	0
3aec78c6c0d020e4578bb63fc9c7b59c	0	0	0	0	0	340	0	0	0	0	0	0	90	0	0	0	0	0	0	0	0	0	0	0	0	0	0	0	0	0	0	0	0	0	0	0	0
0c696ec7bc96e63a687a52564d5c287d	0	0	0	0	0	0	0	0	0	0	0	0	0	0	0	0	0	0	0	0	0	0	0	0	0	0	0	36	0	123	174	97	0	0	0	0	0
587c3ddac60b24422508440a451e0488	19	19	0	0	0	0	0	0	87	0	0	0	0	208	0	0	0	24	5	29	0	0	0	0	0	0	0	4	0	0	0	0	0	5	24	0	0
a7ba5ff3a947a42d4280c9a0fa1f09f8	0	0	0	0	158	0	0	0	0	0	56	0	0	0	0	0	0	0	0	189	0	0	0	0	0	0	0	0	0	20	0	0	0	0	0	0	0
9819b49f061821363bd6d374c8229da0	0	0	0	0	0	0	0	0	0	0	0	0	0	0	0	0	0	0	0	0	339	0	0	0	0	0	0	84	0	0	0	0	0	0	0	0	0
95ded811a4d64ef1c199f34d7225c094	0	0	0	0	0	0	0	0	0	421	0	0	0	0	0	0	0	0	0	0	0	0	0	0	0	0	0	0	0	0	0	0	0	0	0	0	0
b79ff4ab4eb35bb7301342ec70c1e300	0	0	0	0	0	0	0	6	10	0	0	46	0	62	0	0	127	0	0	0	4	0	0	93	0	46	0	0	0	7	0	2	14	0	0	2	0
bbb98eaacbffc31390a4159b082135ea	0	0	0	0	0	0	0	0	0	0	0	0	0	0	0	0	0	0	0	0	0	0	0	0	0	0	415	0	0	0	0	0	0	2	0	0	0
2f22b944981e7be9a51f8a240b337e67	0	0	0	0	0	0	0	0	0	0	0	0	0	0	0	0	0	0	0	0	0	344	73	0	0	0	0	0	0	0	0	0	0	0	0	0	0
9055838225fbe8c796aebf2ae2dc7c9a	0	0	0	0	0	0	415	0	0	0	0	0	0	0	0	0	0	0	0	0	0	0	0	0	0	0	0	0	0	0	0	0	0	0	0	0	0
8f6957c6b1fe0505977618d48771b54a	0	0	0	0	0	0	0	0	0	0	0	0	0	0	0	0	0	0	0	0	0	0	0	0	0	0	0	0	0	0	0	0	0	0	415	0	0
08853886b153b5fc97a8fc43501d8ae4	25	0	0	0	0	0	0	0	0	0	350	0	0	0	0	40	0	0	0	0	0	0	0	0	0	0	0	0	0	0	0	0	0	0	0	0	0
bad22af874b1e4c21c033092927cbf28	0	7	0	0	26	0	0	0	0	196	0	0	0	24	0	0	0	3	0	0	0	0	0	0	0	0	0	5	0	9	86	4	52	0	0	2	0
0eadb37659912ebd2b9e27aa75a58b55	0	0	0	0	0	0	0	0	0	0	0	0	0	0	0	0	0	0	0	0	0	0	0	0	0	0	0	0	0	0	0	0	0	0	0	0	414
aa868c74b1bfaf8851627f0d31efd757	0	0	0	0	0	0	0	0	0	0	0	0	0	0	0	224	122	0	0	23	0	0	0	0	24	0	11	0	0	0	0	0	0	0	8	0	0
b71fca3a7b5b873ad03f684eb6feb167	0	0	0	0	0	0	0	0	0	379	32	0	0	0	0	0	0	0	0	0	0	0	0	0	0	0	0	0	0	0	0	0	0	0	0	0	0
f964e5b4e246009a98373c132defcdf5	0	0	0	0	0	0	0	0	0	0	0	0	0	0	0	0	0	0	0	0	0	0	0	0	0	0	0	0	0	0	0	0	0	0	408	0	0
e3763f37ced8991a14005e352690068a	0	0	0	6	0	0	0	0	0	0	0	0	0	0	0	0	0	0	0	0	0	0	0	0	0	0	0	0	0	0	0	13	2	371	14	0	0
5de8aac5ea12c24191b3c438a03827bd	0	0	0	0	0	0	0	0	0	0	0	0	0	0	0	0	0	0	0	0	0	0	0	0	49	0	0	0	0	0	355	0	0	0	0	0	0
34bd6ea451346af9a50fda2f6f1123a3	0	0	0	0	30	0	313	0	0	0	24	0	0	0	0	0	34	0	0	0	0	0	0	0	0	0	0	0	0	0	0	0	0	0	0	0	0
2e88ce33cb8aa88cf8a2a79208aa267d	0	51	0	0	0	0	0	0	0	0	0	0	0	0	0	0	0	0	0	0	0	0	0	0	349	0	0	0	0	0	0	0	0	0	0	0	0
f0bde2f54893276b9ba2239c532b706a	0	0	0	0	0	0	0	15	6	8	0	0	0	202	0	0	0	0	0	0	0	0	0	0	0	6	0	4	0	0	0	0	0	24	134	0	0
5e49c0da5bb3cd77fb836ddb76fdb706	0	79	0	0	0	0	0	0	0	0	0	0	0	0	0	0	0	0	0	0	0	0	0	0	319	0	0	0	0	0	0	0	0	0	0	0	0
f4f4aac0553a39efee42e6b75708ed78	0	0	0	0	0	0	0	0	0	0	0	0	0	0	397	0	0	0	0	0	0	0	0	0	0	0	0	0	0	0	0	0	0	0	0	0	0
4809554690dbc985f7167eaa54bb8fe2	0	0	0	169	0	0	0	0	0	0	0	0	0	0	0	136	0	0	0	0	0	0	89	0	0	0	0	0	0	0	0	0	0	0	0	0	0
e417a5cf5b784eb97da5b480a07c8c53	0	0	0	0	0	0	0	0	391	0	0	0	0	0	0	0	0	0	0	0	0	0	0	0	0	0	0	0	0	0	0	0	0	0	0	0	0
724dfd468b7b7435d801f2d6522f34ec	0	0	0	0	0	0	0	0	0	0	0	0	0	0	0	0	0	0	0	390	0	0	0	0	0	0	0	0	0	0	0	0	0	0	0	0	0
3ba248b6b2299c80fb24205a39478701	0	0	0	0	0	0	0	0	0	0	0	0	0	0	0	0	0	0	0	0	0	0	0	0	390	0	0	0	0	0	0	0	0	0	0	0	0
7902966d8a5ff7cf44af50070d8b028d	0	0	0	0	0	0	0	0	0	0	0	0	0	0	346	0	0	0	0	20	0	0	6	0	0	0	0	0	0	8	0	0	9	0	0	0	0
a579d3deee2e33574e0534cc31e5c0d6	196	0	56	0	0	0	0	0	0	0	0	0	0	0	14	117	0	0	0	0	0	0	0	0	0	0	0	0	0	0	0	0	0	0	0	0	0
0d55e75c07f541022e729d89c411fd95	0	0	0	39	0	0	0	16	0	0	0	0	0	0	0	0	0	0	0	0	0	0	0	0	0	0	327	0	0	0	0	0	0	0	0	0	0
fc2138f149371ea8332b5697f05b8b37	0	0	0	0	0	0	0	380	0	0	0	0	0	0	0	0	0	0	0	0	0	0	0	0	0	0	0	0	0	0	0	0	0	0	0	0	0
6af92697b852d6aee5853ecdad063a69	0	0	0	0	0	0	0	0	0	0	0	0	0	0	0	0	0	0	0	0	0	0	0	380	0	0	0	0	0	0	0	0	0	0	0	0	0
b390e46bc387dffdcbf2794897408513	0	0	0	0	0	0	0	0	0	19	0	0	360	0	0	0	0	0	0	0	0	0	0	0	0	0	0	0	0	0	0	0	0	0	0	0	0
c12824d4f207121d5f0b43568dce3db9	0	0	0	0	121	0	0	0	0	0	0	0	0	0	0	0	256	0	0	0	0	0	0	0	0	0	0	0	0	0	0	0	0	0	0	0	0
74cb71345732ec71bbea68dce3cc4e08	0	0	0	0	0	0	0	0	0	334	0	0	0	0	0	0	0	0	0	0	0	0	0	42	0	0	0	0	0	0	0	0	0	0	0	0	0
c7c334f5981f54dfc598b4bb4598456b	0	0	0	0	0	0	0	0	0	0	0	0	0	0	0	0	0	0	0	0	0	0	0	0	0	0	0	0	0	0	375	0	0	0	0	0	0
dbbbdd47db72de0a6089fe73b0f40ccb	0	0	0	0	0	0	0	0	0	0	0	0	0	0	373	0	0	0	0	0	0	0	0	0	0	0	0	0	0	0	0	0	0	0	0	0	0
9c93e4fa743f98dec8fd1936ab3ac153	13	0	0	0	0	0	0	21	218	0	0	0	0	0	0	0	0	3	0	87	0	0	0	0	0	0	25	0	0	0	0	0	0	4	0	0	0
69a73803579fc4e49f07ac9b460d5851	0	0	0	0	0	0	0	0	0	0	0	0	0	0	0	0	0	0	0	0	0	0	0	0	0	0	0	0	0	371	0	0	0	0	0	0	0
2457188c02b21b4e228c436873a15b5a	0	12	0	0	0	0	0	5	0	0	0	0	0	0	0	0	0	0	0	0	0	0	0	0	0	0	0	0	0	41	0	31	0	77	204	0	0
7d0b0b0ea0e7a87e4de276c1c71c9187	0	0	0	0	0	0	0	0	0	0	0	0	0	0	0	0	0	0	0	0	0	0	0	0	0	0	0	368	0	0	0	0	0	0	0	0	0
cccf3fa1adb64ed977b18957f2bb0f9a	0	0	0	0	0	0	0	0	0	0	0	0	0	0	365	0	0	0	0	0	0	0	0	0	0	0	0	0	0	0	0	0	0	0	0	0	0
0064c3bd554b6d97676edb9df6dae9e3	0	0	0	252	0	0	0	0	0	0	0	0	0	0	0	0	0	31	0	0	0	0	81	0	0	0	0	0	0	0	0	0	0	0	0	0	0
3300d17477c534509c8857e10a3e6089	0	0	0	0	0	0	0	0	0	88	0	0	0	0	0	0	0	0	0	0	0	20	0	81	0	107	0	38	0	0	0	0	0	0	0	0	29
5fa0692b885b259260cca5deac4b58c7	0	0	0	0	0	8	354	0	0	0	0	0	0	0	0	0	0	0	0	0	0	0	0	0	0	0	0	0	0	0	0	0	0	0	0	0	0
bad51910e09f868c9ca1d54f76b32504	0	0	0	0	0	0	0	0	0	0	0	0	0	137	0	0	0	0	0	0	0	0	0	0	0	0	0	0	0	0	37	0	0	0	0	187	0
ae6f5b43634f958a0b273d784291ccee	0	0	0	0	0	0	0	0	0	0	0	0	0	0	0	0	0	0	0	0	0	0	0	0	0	0	0	0	0	0	0	360	0	0	0	0	0
fc4b58040e9db368e7b942f1a7b67c99	0	0	0	0	0	0	0	0	0	0	0	0	0	0	0	0	0	0	0	0	0	0	0	0	0	0	0	358	0	0	0	0	0	0	0	0	0
5f37d0126586615363ad082a27c40635	0	0	0	0	0	0	0	0	0	0	0	0	0	0	0	0	0	0	0	0	0	312	45	0	0	0	0	0	0	0	0	0	0	0	0	0	0
c4aa9ec8aa8f6f499049780c5f0013ae	0	48	0	0	0	0	0	0	0	0	0	0	0	0	0	0	30	0	0	0	0	107	0	0	0	0	0	0	0	0	0	0	0	0	171	0	0
bd4306a2e99e4c1e3589f2c893bd0cbe	0	12	0	2	0	0	0	0	0	0	0	0	0	0	0	0	28	0	0	0	0	31	0	0	0	0	0	124	0	7	0	0	0	85	67	0	0
1ad20c0e4ced6c44f511ebce94b1c540	0	0	0	0	40	0	0	0	0	0	0	0	0	0	0	0	289	0	0	0	0	0	0	0	0	0	0	0	0	0	0	0	0	27	0	0	0
a6a6c0428fd7d4b55f800b9e65921ae7	0	4	0	0	0	0	0	25	19	238	0	0	0	0	0	0	0	0	0	0	0	0	3	54	0	0	12	0	0	0	0	0	0	0	0	0	0
3c22f74fa9bfce631f47b5e530ed52b4	0	0	0	0	0	0	0	0	0	0	0	0	0	0	0	0	128	0	0	0	0	0	0	0	0	0	0	3	0	0	141	0	0	0	83	0	0
4bf642bb8682662405310e0668434364	8	0	0	0	0	0	2	0	0	0	331	0	0	0	0	0	0	13	0	0	0	0	0	0	0	0	0	0	0	0	0	0	0	0	0	0	0
8f31bf6388745d073246b5e095dd9e95	0	352	0	0	0	0	0	0	0	0	0	0	0	0	0	0	0	0	0	0	0	0	0	0	0	0	0	0	0	0	0	0	0	0	0	0	0
deed9b0082492eb0e3b648a141e99872	0	0	0	0	314	0	0	0	0	5	0	0	0	0	0	0	0	0	0	0	0	0	0	0	0	0	0	6	0	0	0	0	0	24	0	0	0
0f9eb5ba24b7008af83470ca9e9c2332	40	0	36	0	0	0	204	69	0	0	0	0	0	0	0	0	0	0	0	0	0	0	0	0	0	0	0	0	0	0	0	0	0	0	0	0	0
6f50f8aba80b214d1b826ae02d0890d9	0	3	3	7	0	4	22	4	18	8	0	7	12	0	15	0	20	17	0	6	0	14	21	26	21	12	0	10	17	3	24	15	12	0	8	11	6
5db5a9808af85baed8cac5db8cd36173	0	0	0	0	0	0	0	0	0	0	0	0	0	66	0	0	0	0	0	0	0	0	0	0	0	278	0	0	0	0	0	0	0	0	0	0	0
5ad3f854ac5dfcd6d498fc7543f9621e	0	158	0	0	0	0	0	0	0	0	0	0	0	0	0	0	0	0	0	0	0	0	0	0	186	0	0	0	0	0	0	0	0	0	0	0	0
afb6a2d274d248174c0fe36dbcb09367	0	0	0	0	0	0	0	0	0	0	0	0	0	0	0	0	0	0	0	206	137	0	0	0	0	0	0	0	0	0	0	0	0	0	0	0	0
d2d444fd54bca80fbe5fa5a4c9be57fc	0	0	0	0	0	0	0	0	0	0	0	27	0	0	0	6	31	0	0	278	0	0	0	0	0	0	0	0	0	0	0	0	0	0	0	0	0
8b035cdd2dddc02c37721aab1f85e11a	0	0	0	0	0	0	0	0	0	0	0	341	0	0	0	0	0	0	0	0	0	0	0	0	0	0	0	0	0	0	0	0	0	0	0	0	0
fc4127b131c92fe26cbcffbd741a987c	0	0	0	0	0	0	0	0	0	235	0	0	0	0	0	0	0	0	0	0	0	0	0	0	0	0	0	0	4	0	0	0	0	0	0	0	97
6d838db44bfc246beb94f5bb35e7a10b	0	54	0	0	0	0	0	0	0	0	16	0	0	119	0	0	0	0	34	0	21	0	0	77	0	14	0	0	0	0	0	0	0	0	0	0	0
6fc5c893c6e1bd53e4a908bd46f139c1	0	178	0	0	0	0	0	0	0	0	0	0	0	0	0	0	90	0	0	0	0	0	0	0	0	0	0	0	0	33	0	33	0	0	0	0	0
ae72d42beeb0a7d71564a83c52fd39c4	0	0	0	20	0	0	0	36	0	0	116	0	0	0	0	68	0	0	0	0	17	0	0	0	0	0	0	0	43	0	0	0	13	0	7	0	11
9ca8c72bf9e6b3467406e699414bc3df	0	0	0	0	0	0	0	0	0	0	0	0	0	0	0	0	0	0	0	0	0	0	0	0	0	0	0	214	0	0	0	116	0	0	0	0	0
70d1622fbb37b1a7de863284fb83e241	0	21	0	0	0	0	0	0	0	0	0	0	0	0	0	0	7	0	0	0	0	0	0	0	0	13	0	232	0	31	0	13	0	13	0	0	0
e96b18570951cf4f64a9e34657da716a	0	65	0	0	0	0	0	0	0	0	0	0	0	0	0	0	0	0	0	0	0	0	0	0	264	0	0	0	0	0	0	0	0	0	0	0	0
8069546e64b80cc59106ef13da2f435b	0	0	0	0	0	0	0	0	39	0	0	0	0	0	0	0	0	0	0	0	0	0	0	19	271	0	0	0	0	0	0	0	0	0	0	0	0
bae2b1fa1bf75c0baf09075176b4edd8	0	144	0	0	0	0	0	0	0	0	0	0	0	0	0	0	0	0	0	0	0	0	0	0	0	0	0	0	0	40	0	143	0	0	0	0	0
b5c380cb9e005963acb9f7f764cf2ba7	0	0	0	0	0	0	0	0	0	0	0	0	0	0	0	0	0	0	0	0	0	0	0	0	320	0	4	0	0	0	0	0	0	0	0	0	0
6c44b51d07eba2cf5b2ab6f7f57e7fdd	0	0	0	0	0	0	0	0	0	0	0	0	0	0	0	0	0	0	0	0	0	0	0	0	0	0	0	0	0	0	0	0	0	143	181	0	0
03ac181bf688f0927a75a75d6edeeb0c	0	0	0	0	0	0	0	0	322	0	0	0	0	0	0	0	0	0	0	0	0	0	0	0	0	0	0	0	0	0	0	0	0	0	0	0	0
2834e51d87bb60227009f97a5e1106c1	0	41	0	0	0	0	0	33	0	5	0	0	0	0	0	0	0	0	0	0	0	23	0	3	146	0	40	0	0	0	3	27	0	0	0	0	0
3d0409f8d3cc4518ffc12eeb1b1feed8	90	0	0	0	120	0	0	0	0	0	0	0	0	0	0	0	0	0	0	0	0	0	0	0	0	0	0	0	0	0	0	0	0	83	14	0	13
ef213128514c6acd147e2d182031965b	0	0	0	0	0	0	0	0	319	0	0	0	0	0	0	0	0	0	0	0	0	0	0	0	0	0	0	0	0	0	0	0	0	0	0	0	0
f4a4337f4a3eff3d8111396eafa18a31	0	0	0	0	0	0	0	0	0	0	314	0	0	0	0	0	0	0	3	0	0	0	0	0	0	0	0	0	0	0	0	0	0	0	0	0	0
d27532ebd8e6e597d72938847166f333	0	0	0	0	0	0	0	0	0	0	0	0	0	0	0	0	0	0	0	0	0	0	0	0	0	0	0	0	0	0	0	0	0	0	0	317	0
778e8d13740e4b5c89bb310db0b54960	0	0	0	13	123	0	17	68	15	0	0	13	0	0	51	10	7	0	0	0	0	0	0	0	0	0	0	0	0	0	0	0	0	0	0	0	0
92ee9556b58d5b33f3a5f0b95b3a44f5	0	0	0	0	0	0	0	0	0	0	0	0	0	0	0	0	316	0	0	0	0	0	0	0	0	0	0	0	0	0	0	0	0	0	0	0	0
e692fcf963c630541c141757c5eb197a	0	0	0	2	70	0	0	0	0	0	0	0	0	0	0	0	0	0	0	0	0	0	0	0	0	0	0	0	0	0	233	0	0	10	0	0	0
9b9d7ace542b54166c52ec8aed7f77d7	0	69	0	0	0	0	0	0	0	0	0	0	0	0	0	0	0	0	0	0	0	0	0	0	173	0	0	0	0	0	0	0	0	0	72	0	0
38299466f203f992165f2a2bd4fb14a5	0	0	0	0	6	0	88	0	0	0	79	0	0	7	0	134	0	0	0	0	0	0	0	0	0	0	0	0	0	0	0	0	0	0	0	0	0
03f72d0bd752e28eb1ec51f73f116a70	0	313	0	0	0	0	0	0	0	0	0	0	0	0	0	0	0	0	0	0	0	0	0	0	0	0	0	0	0	0	0	0	0	0	0	0	0
ffec160aa3b864097272d75b387f4914	100	0	0	0	0	0	0	0	0	66	0	0	0	21	0	0	0	0	0	0	0	0	0	12	0	42	0	0	0	0	38	0	17	0	0	0	16
c80b3d1adcf8ab54b1b218f44967ca20	0	0	0	0	0	0	55	0	0	0	0	0	92	0	0	100	0	0	8	0	0	0	0	56	0	0	0	0	0	0	0	0	0	0	0	0	0
32f4cbfc4601875e37e84a62bcffe4f5	0	0	0	0	0	0	0	0	0	0	0	10	0	0	0	0	0	0	0	0	0	20	0	70	0	0	0	145	0	0	26	0	0	0	0	0	40
107bdc303e608196291544ac52ca46ed	0	0	0	0	0	0	0	0	0	0	0	0	0	0	0	0	0	0	0	0	0	0	0	0	0	0	0	311	0	0	0	0	0	0	0	0	0
2ad11f646baf1ae21cfbcd5cdb5fbc43	0	0	0	0	0	0	0	0	0	0	0	0	0	0	0	0	0	0	0	0	0	0	0	0	0	0	0	0	0	0	0	0	0	0	3	0	307
c46b559fefcc0cc11d8a0d1a261d90aa	0	6	0	0	0	0	0	0	0	143	151	0	0	0	0	0	0	0	0	0	0	6	0	0	0	0	0	0	0	0	0	0	0	0	0	0	0
d3f6e6b185df0dc9906bc401bebfa22b	0	0	0	0	0	0	0	0	0	0	59	0	0	0	0	0	0	0	0	246	0	0	0	0	0	0	0	0	0	0	0	0	0	0	0	0	0
d2ceda88a01ff41aa203b67e5e1a4f7e	0	0	0	0	0	0	0	0	0	0	0	273	0	0	0	0	0	0	31	0	0	0	0	0	0	0	0	0	0	0	0	0	0	0	0	0	0
91d5e06d37820c3bd2d9ffff29623c35	0	0	0	0	0	0	0	0	0	0	0	0	303	0	0	0	0	0	0	0	0	0	0	0	0	0	0	0	0	0	0	0	0	0	0	0	0
556b7ce4f9681e992a6f65ce5c439ee5	3	300	0	0	0	0	0	0	0	0	0	0	0	0	0	0	0	0	0	0	0	0	0	0	0	0	0	0	0	0	0	0	0	0	0	0	0
9f0f791f747ea8ee14b756fb94bdc7d9	0	0	0	0	0	0	0	0	0	0	0	0	0	0	0	0	0	0	0	0	302	0	0	0	0	0	0	0	0	0	0	0	0	0	0	0	0
e3959d1dc44dc0c804345bd9aa1ba29e	0	0	0	0	0	0	0	0	0	0	21	0	0	0	0	278	0	0	0	0	0	0	0	0	0	0	0	0	0	0	0	0	0	0	0	0	0
9ff70f4af4cdd4f400ea1555c8cd7db2	0	0	0	0	0	0	0	0	0	0	0	0	0	0	0	0	0	0	0	0	0	0	0	0	0	299	0	0	0	0	0	0	0	0	0	0	0
5344e8c1e741678b0213981c64c39d6d	0	0	0	0	0	0	0	0	0	298	0	0	0	0	0	0	0	0	0	0	0	0	0	0	0	0	0	0	0	0	0	0	0	0	0	0	0
88e1b4cd99cb159f7f848f7556a4a6e1	0	0	0	0	0	0	0	0	0	0	0	0	0	0	0	0	0	0	0	0	0	0	0	0	0	226	0	0	0	0	0	0	0	0	0	71	0
9fa545899131066bfe60e11645b38db4	0	0	0	0	72	0	0	0	0	224	0	0	0	0	0	0	0	0	0	0	0	0	0	0	0	0	0	0	0	0	0	0	0	0	0	0	0
a60c50c24d7e62447f8005112addf0c9	0	0	0	0	0	0	0	0	0	0	0	75	0	0	0	0	0	0	0	0	0	0	0	0	0	0	0	0	0	45	0	0	0	0	0	174	0
85158b84ddd0143d5bc5de0696f0beb8	0	0	0	0	0	0	0	0	0	13	0	0	0	0	0	0	0	0	0	0	0	0	0	61	6	204	0	0	0	0	0	0	0	0	0	0	9
a70f4192be62b02fe8414f8159871ab3	0	0	34	0	141	2	0	0	18	49	0	0	0	0	0	0	0	0	0	0	0	0	0	3	0	0	0	0	0	0	0	0	19	0	0	3	22
34f54d72f80431a81487d32efc82ceb1	0	0	0	0	0	0	0	0	0	0	0	0	0	0	0	243	0	0	0	0	0	0	0	0	48	0	0	0	0	0	0	0	0	0	0	0	0
6e602016508786d0e545f6354b13a49e	0	161	0	0	0	0	0	0	11	0	0	0	0	0	0	0	0	0	81	0	0	0	0	0	0	0	37	0	0	0	0	0	0	0	0	0	0
45a0b5007730d6bf069796c2519b38aa	0	0	0	0	0	0	0	0	0	0	0	0	0	0	0	0	0	0	0	0	0	0	0	0	0	0	0	0	0	0	280	10	0	0	0	0	0
aa6354e491388f45a243bce8fc9c2096	0	0	0	0	0	0	0	0	0	0	0	0	0	0	0	0	0	0	0	0	0	0	0	0	0	0	0	165	0	30	55	39	0	0	0	0	0
8016330393ced799e1b533e2f3861035	0	0	0	0	0	0	0	0	0	0	288	0	0	0	0	0	0	0	0	0	0	0	0	0	0	0	0	0	0	0	0	0	0	0	0	0	0
90fb51e1a56241ae033e5c1806939f24	0	0	0	0	0	0	35	0	0	0	0	0	0	0	0	0	0	0	0	0	12	0	0	0	0	0	0	237	0	0	0	0	0	0	0	0	0
7575c5d1e36ca75c5a8171a29077f1d8	0	0	0	0	0	0	0	0	0	273	8	0	0	0	0	0	0	0	0	0	0	0	0	0	0	0	0	0	0	0	0	0	0	0	0	0	0
145d01e6f2eeba7c31fe192efede7a34	0	0	0	0	0	0	4	0	0	0	206	0	0	0	0	0	0	0	0	0	0	0	0	0	0	0	0	0	0	0	0	0	0	0	0	0	71
06c0de982979a6afc4a30b3e2081a47b	18	0	0	0	0	0	0	0	0	56	0	0	0	0	12	0	0	0	0	0	0	35	0	31	0	0	0	20	0	13	36	0	18	0	0	0	42
3f7858a882d7ff5e5ebe85c475015325	0	92	0	2	0	0	0	0	9	0	3	2	0	0	0	0	0	0	0	0	0	0	0	5	130	0	0	0	0	19	0	18	0	0	0	0	0
d642ea334f01b4ade11aa5341ab89b8e	0	136	0	0	0	0	0	0	0	0	0	0	0	0	0	0	0	0	0	0	0	0	0	0	8	0	0	135	0	0	0	0	0	0	0	0	0
f5a08e232f02824dcacfeb19ec330d96	0	160	0	0	0	0	0	0	0	0	0	0	0	0	0	0	0	0	67	0	0	0	0	0	0	0	50	0	0	0	0	0	0	0	0	0	0
ebf6f67a718ea757efa9ea7af1339313	0	0	0	0	0	0	0	0	0	0	0	0	0	0	0	0	0	0	0	0	0	0	0	276	0	0	0	0	0	0	0	0	0	0	0	0	0
64d38d68414b10d8cbb3db03f949b2dd	0	66	0	0	0	0	0	0	0	0	0	0	0	0	0	0	0	0	0	0	0	0	0	0	0	0	0	0	0	210	0	0	0	0	0	0	0
13b3e0d7828e69cf98844b70cba622bf	0	0	0	0	0	0	0	0	0	261	14	0	0	0	0	0	0	0	0	0	0	0	0	0	0	0	0	0	0	0	0	0	0	0	0	0	0
398d4f96e9a6eba00714873fdfc70b32	0	274	0	0	0	0	0	0	0	0	0	0	0	0	0	0	0	0	0	0	0	0	0	0	0	0	0	0	0	0	0	0	0	0	0	0	0
28ea022bc82100daefe3e85196899705	0	0	0	0	0	0	0	0	0	0	0	0	0	0	0	0	0	0	0	0	0	0	0	0	0	273	0	0	0	0	0	0	0	0	0	0	0
029998cf663c2ed2b119c401b69b0b57	0	273	0	0	0	0	0	0	0	0	0	0	0	0	0	0	0	0	0	0	0	0	0	0	0	0	0	0	0	0	0	0	0	0	0	0	0
82258f1488fd754cc7f95dbed297874c	0	0	0	0	0	0	0	0	0	0	0	0	0	0	272	0	0	0	0	0	0	0	0	0	0	0	0	0	0	0	0	0	0	0	0	0	0
2a25d9a914d0991e7ae76213883a9d2b	0	0	0	0	0	0	0	0	0	0	272	0	0	0	0	0	0	0	0	0	0	0	0	0	0	0	0	0	0	0	0	0	0	0	0	0	0
aaf138c82d305c0e783b990ed7874cd5	0	0	0	0	0	0	0	0	0	0	0	0	0	0	0	0	0	7	0	0	0	0	0	262	0	0	0	0	0	0	0	0	0	0	0	0	0
87b64284d8dc4c6ba36ff3bd097bb906	0	0	0	0	0	0	0	0	0	0	0	0	0	0	0	0	0	0	0	0	0	0	0	0	0	0	0	0	0	0	0	0	0	0	0	269	0
35820a1e4a2398a07d8689c503a08762	0	0	0	0	0	0	0	0	0	0	0	35	0	0	0	0	0	0	0	0	0	0	0	0	0	0	0	0	0	0	0	0	234	0	0	0	0
23f2599fbcb12d5e3fdb9b9ffc19328d	0	0	0	0	0	0	0	0	0	0	0	0	0	0	72	0	0	0	0	0	0	0	0	0	0	0	0	0	0	0	0	0	0	0	0	197	0
ed34346b6641c391686faf483a841b17	0	0	0	0	0	0	0	0	0	0	0	0	268	0	0	0	0	0	0	0	0	0	0	0	0	0	0	0	0	0	0	0	0	0	0	0	0
de850ad87feb9f09b378e15649075b21	0	0	0	0	0	0	0	0	0	0	0	0	0	0	0	0	0	0	0	0	0	0	0	0	0	0	0	159	0	19	51	39	0	0	0	0	0
3683c8443180d904d45c992f9c5fe2d5	0	0	0	0	0	0	0	0	0	0	0	0	0	0	0	0	0	0	0	0	0	28	0	0	0	0	0	0	0	0	119	0	0	0	0	0	121
b2a35e0f511951b958c26d9de6c97cc7	0	0	0	0	0	150	0	17	5	0	0	0	0	0	95	0	0	0	0	0	0	0	0	0	0	0	0	0	0	0	0	0	0	0	0	0	0
038ff0275d44d4835dcc46c84ad1d958	0	0	0	0	267	0	0	0	0	0	0	0	0	0	0	0	0	0	0	0	0	0	0	0	0	0	0	0	0	0	0	0	0	0	0	0	0
c06e6cbeaeca04ce9a9687810c811532	0	0	0	0	0	0	0	0	0	0	0	0	0	0	0	0	0	0	0	0	0	0	0	0	125	0	0	0	141	0	0	0	0	0	0	0	0
64659ecae719e2cc18d98b5cc1774ae1	0	0	0	0	0	0	0	0	0	0	0	0	0	0	0	0	0	0	0	0	0	0	0	0	0	0	0	48	0	0	0	0	106	112	0	0	0
2eb1f48e5a09eab4e8d874aba776e14b	0	0	80	4	0	5	0	0	0	2	0	0	0	0	0	0	0	85	0	0	0	0	0	0	0	8	63	0	0	0	0	0	19	0	0	0	0
9db8c0f98d44045d6891519159fe66ca	0	0	0	0	0	0	0	0	0	0	0	3	262	0	0	0	0	0	0	0	0	0	0	0	0	0	0	0	0	0	0	0	0	0	0	0	0
be8d901aab30d6b83667dafa35f1f7b0	0	0	0	0	0	0	262	0	0	0	0	0	0	0	0	0	0	0	0	0	0	0	0	0	0	0	0	0	0	0	0	0	0	0	0	0	2
a154f80c5f63fef91e612dbfccfa6ffe	0	0	0	0	0	0	0	2	0	3	259	0	0	0	0	0	0	0	0	0	0	0	0	0	0	0	0	0	0	0	0	0	0	0	0	0	0
64a179221e1d2134d69907745dbef025	0	82	0	0	0	0	0	0	0	0	0	0	0	0	0	0	0	0	0	0	9	0	0	0	126	0	5	0	0	21	0	21	0	0	0	0	0
cabcd813f37e8ca4692ee12e2da6725e	0	0	0	0	0	0	0	0	0	0	0	0	0	0	0	0	0	0	0	0	0	0	0	0	0	0	261	0	0	0	0	0	0	0	0	0	0
f82def37e8543f757fad5257a104301b	0	31	0	0	0	0	0	0	0	0	0	0	0	0	0	4	0	0	0	0	0	0	0	0	0	0	0	193	0	0	0	0	0	7	23	0	0
c8a720fc4bd390a06c5ca8d5734543f0	0	181	0	0	0	0	0	0	11	0	0	0	0	0	0	0	0	0	41	0	0	0	0	0	0	0	25	0	0	0	0	0	0	0	0	0	0
5f63ec50c82ed3a35a824a5f1243609f	0	0	0	0	0	0	0	0	0	0	0	0	253	0	5	0	0	0	0	0	0	0	0	0	0	0	0	0	0	0	0	0	0	0	0	0	0
040f126883bcccf4723fad04da9e93ab	0	0	0	0	0	0	0	0	0	0	0	0	0	0	0	0	0	0	0	0	0	0	0	0	0	0	0	0	0	0	96	0	61	101	0	0	0
0936542641f0f8b65a75fc218a4351b8	0	26	0	0	0	0	0	0	0	0	0	0	0	0	0	0	0	0	0	0	0	0	0	0	231	0	0	0	0	0	0	0	0	0	0	0	0
05fd09eae32e38ac908daa50f46b5d3f	0	49	0	0	0	0	0	0	0	0	0	0	0	0	0	0	0	0	0	0	0	0	0	0	207	0	0	0	0	0	0	0	0	0	0	0	0
67c619736e78abfcc7491f50873367be	0	0	0	0	0	0	0	0	0	0	0	0	0	0	0	0	0	0	0	0	0	43	0	0	0	0	0	0	0	0	0	0	0	0	0	209	0
115c8075e738be941fcafa8225e2536f	0	0	0	0	0	0	0	0	0	0	0	0	0	0	252	0	0	0	0	0	0	0	0	0	0	0	0	0	0	0	0	0	0	0	0	0	0
10ad1fff4332a0f979c90aabc7c625b5	0	0	0	0	0	0	0	0	0	0	251	0	0	0	0	0	0	0	0	0	0	0	0	0	0	0	0	0	0	0	0	0	0	0	0	0	0
e2c6cd59fb6e3024ecb55d2be19801ae	0	116	0	0	0	0	0	0	0	0	0	0	0	0	0	0	106	0	0	0	0	0	0	0	0	0	0	0	0	0	0	27	0	0	0	0	0
d0ab2c15400fe710288526c9a33083fb	14	24	0	10	8	0	0	14	0	10	3	12	0	28	0	0	0	0	0	9	4	5	0	4	15	17	26	7	0	4	0	16	11	0	0	0	8
73bce6f8381e399f2cfb83807fecb427	0	28	0	0	0	0	0	0	0	0	0	0	0	0	0	0	0	0	0	0	0	0	0	0	221	0	0	0	0	0	0	0	0	0	0	0	0
b55e20ec311e8c062bb8dfc26e308abc	0	0	0	0	0	0	0	0	0	0	0	0	0	0	0	0	0	0	0	0	0	0	0	0	0	0	0	0	0	0	94	0	0	0	0	0	154
2990f7fc5d8f95c3ec2cf36b39f34bfe	0	206	0	0	0	0	0	0	0	0	0	0	0	0	0	0	0	0	0	0	0	0	0	0	0	0	0	0	0	17	0	24	0	0	0	0	0
d5f55dbe726479941205f2bc31366eb3	0	0	15	11	48	0	12	18	3	0	0	4	5	12	11	14	4	8	0	5	0	19	5	2	2	0	5	4	0	3	5	3	8	0	0	18	0
e29b1dc32ad06fec40ea5cd7dbc43be0	0	43	0	0	0	0	0	0	0	0	0	0	0	0	3	0	0	0	0	0	0	0	0	0	43	0	44	0	0	0	48	62	0	0	0	0	0
dda7cad10fffb13cf71ae269d3f193c4	107	0	0	0	0	24	0	0	0	14	0	0	0	0	0	0	0	0	0	0	0	0	0	0	0	0	0	0	0	0	0	0	0	0	0	0	97
5562884268661f79e46407e102869625	0	188	0	0	0	0	0	0	0	0	0	0	0	0	0	0	0	0	0	0	0	0	0	0	0	0	0	11	0	18	0	25	0	0	0	0	0
1063268fa336400e13a38e2ada0502e8	0	0	0	0	0	0	0	0	0	0	0	0	0	0	0	0	0	0	0	0	0	0	0	4	0	0	0	52	0	0	186	0	0	0	0	0	0
2abf2ea115ec68d0abb1f3ed91389f0f	0	0	0	0	0	0	0	0	0	0	241	0	0	0	0	0	0	0	0	0	0	0	0	0	0	0	0	0	0	0	0	0	0	0	0	0	0
1b375ab9678462d9a7e5ec772d64450a	0	0	0	0	0	0	0	0	0	0	0	0	0	0	0	0	241	0	0	0	0	0	0	0	0	0	0	0	0	0	0	0	0	0	0	0	0
d387668d49f5ac57194ff09ce22fd5c5	0	0	0	0	240	0	0	0	0	0	0	0	0	0	0	0	0	0	0	0	0	0	0	0	0	0	0	0	0	0	0	0	0	0	0	0	0
0795ee51b89eb77feb3e1e89aa383d95	46	0	0	0	0	0	194	0	0	0	0	0	0	0	0	0	0	0	0	0	0	0	0	0	0	0	0	0	0	0	0	0	0	0	0	0	0
cd99c28649250b27ac159846f513aaa9	0	0	0	0	0	0	0	0	0	185	0	0	0	0	0	0	0	0	0	0	0	54	0	0	0	0	0	0	0	0	0	0	0	0	0	0	0
a3739fb5c91439a71fd9fff1e6ee75c8	0	14	0	12	0	0	0	49	0	29	7	0	0	0	0	15	0	0	2	27	12	0	0	0	4	21	10	0	0	0	5	0	20	10	0	2	0
6a2658a461ef1b526650d197a7a4f55e	0	0	0	0	0	0	0	0	0	0	239	0	0	0	0	0	0	0	0	0	0	0	0	0	0	0	0	0	0	0	0	0	0	0	0	0	0
dbaa0317d554edfe37d8682796ebebb1	153	0	0	0	0	0	0	0	0	26	0	0	0	0	0	0	0	0	0	0	0	0	0	0	0	59	0	0	0	0	0	0	0	0	0	0	0
ba17d94b23104e3878130e3bf67cbe68	0	10	0	0	0	0	0	0	45	0	0	0	7	37	0	37	0	0	0	0	0	31	0	0	0	0	3	11	0	6	2	0	48	0	0	0	0
7e05291c6a52835249e9bdadc8232380	0	0	0	0	0	0	0	0	0	237	0	0	0	0	0	0	0	0	0	0	0	0	0	0	0	0	0	0	0	0	0	0	0	0	0	0	0
6c7d873dae81440781440336e6870157	0	0	0	0	0	56	0	5	0	0	31	0	0	0	0	0	145	0	0	0	0	0	0	0	0	0	0	0	0	0	0	0	0	0	0	0	0
b28667190bf930ac7384423c9d62e9a6	0	0	0	0	0	0	0	0	0	0	0	0	0	0	235	0	0	0	0	0	0	0	0	0	0	0	0	0	0	0	0	0	0	0	0	0	0
eb715d38cde79661b330cafae28f2229	0	0	0	0	0	0	0	0	0	0	0	0	0	0	0	62	0	0	0	0	0	0	0	0	0	0	0	0	0	0	0	0	0	171	0	0	0
90761dd07c16e8d342505e01eb850708	0	44	0	0	0	0	0	0	0	0	0	0	0	0	0	0	0	0	0	0	0	0	0	0	189	0	0	0	0	0	0	0	0	0	0	0	0
0ca6a0b49b9fbeafafad38c419e35ae6	0	30	0	4	0	0	0	0	0	0	0	0	0	0	0	0	0	0	0	0	0	0	0	0	182	0	0	0	0	0	0	17	0	0	0	0	0
d8dd15ce4b9d7e595385f2662d83721d	0	4	0	0	0	0	0	3	0	0	191	0	0	0	0	0	0	0	0	0	0	0	0	0	0	12	7	0	0	0	0	0	0	0	12	0	3
db4ae723c19774a998e0481e6f780463	0	0	0	0	0	0	0	0	0	229	0	0	0	0	0	0	0	0	0	0	0	0	0	0	0	0	0	0	0	0	0	0	0	0	0	0	0
70c1a4ded6bed56c05688cb5be3289a7	0	0	0	0	0	0	0	0	0	0	0	0	0	0	0	0	0	0	0	0	22	205	0	0	0	0	0	0	0	0	0	0	0	0	0	0	0
f22a2376050c2eda98853dd0e86036c5	0	28	0	0	0	0	0	0	0	0	0	0	0	0	0	0	0	0	0	0	0	0	0	0	197	0	0	0	0	0	0	0	0	0	0	0	0
cddf16f330ef19834d87fe39ba62aae9	0	0	0	0	0	0	0	0	0	0	0	0	0	0	0	0	0	0	0	0	0	0	0	0	0	0	0	0	0	0	0	0	0	0	0	0	225
76e70be0cf32c84074da8b019a8b54a2	0	0	0	0	0	0	0	0	0	0	0	0	0	0	0	0	215	10	0	0	0	0	0	0	0	0	0	0	0	0	0	0	0	0	0	0	0
b4b0c2371558acdddd3eae89cb948b97	0	0	0	0	0	0	0	0	0	0	0	0	0	4	0	0	0	0	3	0	0	53	0	0	0	0	0	10	0	24	28	8	92	0	0	0	0
59026a2e5c5281f6a86a9783cecf89be	0	0	0	0	0	0	0	0	0	0	0	0	0	0	0	0	0	0	0	0	0	0	0	0	0	0	222	0	0	0	0	0	0	0	0	0	0
4d432a50e008d9a209e0ecf1eea2bb14	0	0	0	0	0	0	0	35	0	0	0	163	0	0	0	0	0	0	0	0	0	0	0	0	0	0	0	0	0	6	7	0	10	0	0	0	0
cc30e5e46cba2579bbecb590f0e2cb1d	0	0	0	21	0	0	17	0	0	35	0	0	14	0	0	0	9	0	0	15	0	0	10	7	0	41	0	0	7	0	5	0	21	0	18	0	0
8daea3175e91322abb9e18b3faa8dfd6	0	90	0	0	0	0	0	0	0	0	0	0	0	0	0	0	0	0	0	0	0	0	0	0	105	0	0	0	0	24	0	0	0	0	0	0	0
8ca3dee552a66735453c9435b9046706	0	0	0	0	0	0	0	0	0	0	0	0	0	0	0	0	0	0	0	0	0	0	0	0	219	0	0	0	0	0	0	0	0	0	0	0	0
4f5cc563e19d932bd7a95a0e791ae1e8	0	0	0	0	0	0	0	0	0	0	0	0	0	0	0	0	0	0	0	0	0	0	0	0	0	0	0	0	0	0	0	0	0	219	0	0	0
e3ae5986c0721ffcc7a4485ca5dad4c5	0	0	0	0	0	0	0	0	0	0	0	0	0	0	0	0	0	0	0	0	0	0	0	0	0	0	0	0	0	0	205	13	0	0	0	0	0
d6625fda1805378270906f00c40566fd	0	0	0	0	0	0	0	0	0	0	0	0	0	0	0	0	0	0	0	0	0	0	0	0	218	0	0	0	0	0	0	0	0	0	0	0	0
1bea728516929b37a3a429235a2f630f	0	0	0	0	0	0	0	0	0	218	0	0	0	0	0	0	0	0	0	0	0	0	0	0	0	0	0	0	0	0	0	0	0	0	0	0	0
5b664e55411d36748cd56fed035a97b8	0	13	0	0	0	0	0	0	9	0	0	0	0	0	0	0	0	0	0	0	0	0	0	0	64	4	0	0	0	0	0	127	0	0	0	0	0
2ef59ad423cfd9bd81fbc854078dc6c7	0	146	0	0	0	0	0	0	0	0	0	0	0	0	0	0	0	0	38	0	0	0	0	0	0	0	32	0	0	0	0	0	0	0	0	0	0
ca747a7a5df97b10b7e1dcf00754ab99	128	0	0	0	51	0	0	4	0	0	0	0	0	0	0	0	0	0	0	0	0	0	0	0	0	0	0	0	0	0	0	0	0	32	0	0	0
438b5c281ad4694a368e1f049960287e	0	0	0	0	0	0	0	0	0	0	0	0	0	0	0	0	0	0	0	215	0	0	0	0	0	0	0	0	0	0	0	0	0	0	0	0	0
c6f7bab703d89ca968772f8afcce49bc	0	0	0	0	0	0	0	0	0	0	0	0	0	0	0	0	0	214	0	0	0	0	0	0	0	0	0	0	0	0	0	0	0	0	0	0	0
92f26f39aed46aa467d2d2f1c83f1934	0	0	0	176	0	0	0	0	0	0	0	0	27	0	0	0	10	0	0	0	0	0	0	0	0	0	0	0	0	0	0	0	0	0	0	0	0
f263c79ade608c5820cc632400288d27	0	0	0	0	0	0	0	0	0	0	0	0	0	0	0	0	0	0	0	0	0	0	0	0	0	0	0	0	0	0	0	0	212	0	0	0	0
2cba35eaa727922b4a1e28b9e03259e8	0	0	0	0	0	0	0	0	0	0	28	0	0	0	0	0	0	0	0	184	0	0	0	0	0	0	0	0	0	0	0	0	0	0	0	0	0
d0c49f1f81905e03ed14bfd1df09c3b0	36	0	0	175	0	0	0	0	0	0	0	0	0	0	0	0	0	0	0	0	0	0	0	0	0	0	0	0	0	0	0	0	0	0	0	0	0
940e57720bcbc2f063ea9cded93b76e1	0	0	0	0	0	0	0	0	0	211	0	0	0	0	0	0	0	0	0	0	0	0	0	0	0	0	0	0	0	0	0	0	0	0	0	0	0
717b7cbd0bf1509b2c39b82194445d09	0	0	0	0	0	0	0	0	0	0	0	0	0	0	0	0	0	0	0	10	10	0	0	177	0	0	0	0	0	0	14	0	0	0	0	0	0
49eaa767bf23c1c75550ad1da9169074	0	0	0	0	0	0	0	0	0	0	0	0	0	0	0	0	0	0	0	0	0	0	0	0	0	0	0	0	0	0	210	0	0	0	0	0	0
307b11ac31daa4b93683567cd748d87a	0	0	0	0	0	0	0	210	0	0	0	0	0	0	0	0	0	0	0	0	0	0	0	0	0	0	0	0	0	0	0	0	0	0	0	0	0
44245a0a028079f4b93a6f058d23c348	0	0	24	0	0	0	0	0	0	2	0	2	0	0	117	4	0	0	0	0	0	0	0	11	0	0	0	22	0	15	0	0	6	0	0	0	6
f7321edcd15e3163351d158e1775dd9e	0	27	0	0	0	0	0	0	0	0	0	0	0	0	0	0	0	0	0	0	0	0	0	0	181	0	0	0	0	0	0	0	0	0	0	0	0
e980c3e3ad99e17cba6cf022c72493f1	0	143	0	0	0	0	0	0	0	0	0	0	0	0	0	0	0	0	37	0	0	0	0	0	0	0	28	0	0	0	0	0	0	0	0	0	0
ce8a0f05f182fad6f22fe5f30a85e0aa	0	0	0	0	0	0	0	0	0	0	0	0	0	208	0	0	0	0	0	0	0	0	0	0	0	0	0	0	0	0	0	0	0	0	0	0	0
584e01b79bc07e8cb898f91cbdd464b7	0	0	0	0	0	0	0	208	0	0	0	0	0	0	0	0	0	0	0	0	0	0	0	0	0	0	0	0	0	0	0	0	0	0	0	0	0
6efc68715d86504337f7cded586f0e07	0	0	0	0	0	0	0	206	0	0	0	0	0	0	0	0	0	0	0	0	0	0	0	0	0	0	0	0	0	0	0	0	0	0	0	0	0
03c5284814dbba98d35e9cb0a9de37c4	0	0	0	0	0	0	0	0	0	0	0	0	0	206	0	0	0	0	0	0	0	0	0	0	0	0	0	0	0	0	0	0	0	0	0	0	0
e8f8b6fac73aa88d22160b416cd36281	0	0	0	0	0	0	0	0	0	0	0	0	0	0	205	0	0	0	0	0	0	0	0	0	0	0	0	0	0	0	0	0	0	0	0	0	0
b6c459ca267a48caa0084b12fdf25d8a	0	23	0	0	0	0	0	0	0	0	0	0	0	0	0	0	0	0	0	0	0	0	0	0	180	0	0	0	0	0	0	0	0	0	0	0	0
28b038f2d54001d6f0f88cbfb88150eb	3	0	0	0	84	92	0	0	0	0	0	0	0	0	0	3	0	0	0	0	0	0	0	0	0	0	0	0	0	0	11	0	0	9	0	0	0
268fd4735a883b3d9210388612fd039a	0	0	0	0	0	0	0	0	0	0	0	0	0	0	0	0	0	0	0	0	0	0	0	0	0	0	0	0	0	0	202	0	0	0	0	0	0
7c48e51f5f75d2766132e76debebcded	0	0	0	0	0	29	0	0	0	0	0	0	0	0	0	25	0	0	0	0	0	0	0	0	0	0	0	0	0	0	0	0	0	0	0	0	146
4e51bb38a9bc5955117cfd912f37e0f7	0	0	0	0	0	0	0	0	0	0	0	0	0	0	0	0	0	199	0	0	0	0	0	0	0	0	0	0	0	0	0	0	0	0	0	0	0
009fcbd1e6c098b520da9cba4a6e5087	0	0	0	0	0	0	0	0	0	0	0	0	0	0	0	0	0	0	0	0	0	0	0	0	0	0	0	0	0	198	0	0	0	0	0	0	0
c9197aefc1bb997f1d4753ef83793236	0	0	0	0	0	0	197	0	0	0	0	0	0	0	0	0	0	0	0	0	0	0	0	0	0	0	0	0	0	0	0	0	0	0	0	0	0
82fb2e70f235ebccbe07e2175bd91e78	0	64	0	27	0	0	0	0	0	0	0	0	0	0	0	0	27	0	0	0	0	0	0	0	23	0	0	0	0	44	0	12	0	0	0	0	0
232615ef5118ae54c6bb3043e37bb521	0	16	0	181	0	0	0	0	0	0	0	0	0	0	0	0	0	0	0	0	0	0	0	0	0	0	0	0	0	0	0	0	0	0	0	0	0
9030c8322d37ff06d5f182c582542fb6	0	171	0	0	0	0	0	0	0	0	0	0	0	0	0	0	0	0	0	0	0	0	0	0	0	0	0	0	0	0	0	25	0	0	0	0	0
ded7e41e662aa39043a4dd8e6024626d	0	0	0	0	0	0	0	0	0	0	0	0	0	0	0	0	0	0	0	0	0	0	0	0	0	0	0	150	0	0	0	0	0	45	0	0	0
abfada925e8a452843cb74bd8b9cca12	0	0	0	0	0	0	0	0	0	0	0	0	0	0	0	0	0	0	0	0	0	0	0	64	0	131	0	0	0	0	0	0	0	0	0	0	0
93d17e6bfc60083c01284eacbdf2a6b5	0	0	0	0	0	0	0	0	0	0	0	0	0	0	0	0	0	0	0	0	0	0	0	0	0	0	0	0	0	0	0	0	0	0	195	0	0
441d65b37f212797a6d3e1e479c7c8fb	0	0	0	0	0	0	0	0	0	0	0	0	0	0	0	127	0	0	0	0	0	0	9	58	0	0	0	0	0	0	0	0	0	0	0	0	0
c13359a9f895b1a2b9fcf49ceaea0e8a	17	30	0	19	8	0	0	0	0	28	5	0	0	11	0	0	0	0	0	18	3	0	0	0	0	13	3	3	0	4	2	0	25	4	0	0	0
409cee8a7a1173ab43c03313a4585076	0	0	0	0	0	0	0	0	0	0	0	0	0	0	0	192	0	0	0	0	0	0	0	0	0	0	0	0	0	0	0	0	0	0	0	0	0
b3460127e3cf3d54aa57380ece31a2f0	0	0	0	9	0	0	0	0	48	0	0	0	0	0	26	0	0	0	0	57	5	0	0	0	13	0	28	0	0	0	5	0	0	0	0	0	0
318dfd545d94d66b461dbfa6e5292ad5	0	0	0	0	0	0	0	0	0	0	0	0	0	0	0	0	0	0	0	0	0	0	0	0	0	191	0	0	0	0	0	0	0	0	0	0	0
3985ac9830221cf89edffa35d23315ad	56	0	0	0	0	0	0	18	0	0	0	0	0	0	0	0	0	0	0	0	0	0	0	34	0	45	0	0	0	0	20	0	0	0	0	0	17
f045ac798c84fc5eb948ab3a8f872984	3	2	0	0	0	0	0	93	0	0	0	0	0	0	0	0	0	0	0	0	0	0	0	0	0	0	91	0	0	0	0	0	0	0	0	0	0
2446994929228f24281775f84d315c9f	0	0	0	0	0	0	0	0	0	0	180	0	0	0	0	8	0	0	0	0	0	0	0	0	0	0	0	0	0	0	0	0	0	0	0	0	0
444ed43450fb1e23aff2a6316c2f7dd4	40	61	0	0	0	0	0	0	0	0	0	0	0	0	0	0	0	0	0	0	0	0	0	0	0	0	0	21	0	0	5	51	0	9	0	0	0
c04cd00490a6f5408a13dc91471bd2a4	0	186	0	0	0	0	0	0	0	0	0	0	0	0	0	0	0	0	0	0	0	0	0	0	0	0	0	0	0	0	0	0	0	0	0	0	0
51850eccf9de1870bd5c6a3b61b5875b	0	0	0	0	0	0	0	0	185	0	0	0	0	0	0	0	0	0	0	0	0	0	0	0	0	0	0	0	0	0	0	0	0	0	0	0	0
25043f0fcbddd0afbb26b13243d864cd	0	0	0	0	0	0	0	0	0	0	0	0	0	0	33	0	0	0	0	0	0	0	0	0	0	0	0	152	0	0	0	0	0	0	0	0	0
a1a4bb6f5cf91474249f0fa1dcd5a0df	0	0	0	0	0	0	0	0	0	0	0	0	0	0	0	0	0	0	0	0	0	0	0	0	184	0	0	0	0	0	0	0	0	0	0	0	0
e18a65387b27de7c843dc5fcedb9626f	0	0	0	0	0	0	0	0	0	0	0	0	0	0	183	0	0	0	0	0	0	0	0	0	0	0	0	0	0	0	0	0	0	0	0	0	0
fe024caeebb4e8950edd77299dff5c46	182	0	0	0	0	0	0	0	0	0	0	0	0	0	0	0	0	0	0	0	0	0	0	0	0	0	0	0	0	0	0	0	0	0	0	0	0
e5400356daabbc5a41f935af70513043	0	0	0	125	14	0	0	16	22	0	0	0	0	0	0	0	0	5	0	0	0	0	0	0	0	0	0	0	0	0	0	0	0	0	0	0	0
e44c2bf920be08afce1796e89edd9123	0	0	0	0	0	0	0	0	0	0	0	0	0	0	0	0	0	0	0	0	0	0	0	0	0	0	0	113	0	0	0	69	0	0	0	0	0
99c035bee0a35a0173a072a95385aa62	0	93	0	0	0	0	0	0	0	0	0	0	0	0	0	0	0	0	0	0	0	0	0	0	0	0	0	0	0	18	0	71	0	0	0	0	0
1492298871a52c2485da419ab8d6dc82	0	40	0	0	0	0	0	0	0	0	0	0	0	0	0	0	0	0	0	0	0	0	0	0	142	0	0	0	0	0	0	0	0	0	0	0	0
ef9b184ec490c8d88d6932d6f6729973	0	0	0	0	0	0	0	0	0	0	0	0	0	0	0	0	181	0	0	0	0	0	0	0	0	0	0	0	0	0	0	0	0	0	0	0	0
a2bef7db20d16961fb725069b49b2a35	0	0	0	0	0	0	0	0	0	0	0	0	0	0	181	0	0	0	0	0	0	0	0	0	0	0	0	0	0	0	0	0	0	0	0	0	0
d91edd877f1973fabb1247746ed9dd45	17	162	0	0	0	0	0	0	0	0	0	0	0	0	0	0	0	0	0	0	0	0	0	0	0	0	0	0	0	0	0	0	0	0	0	0	0
039ffa503e1e1fd6bec5853624445ba9	0	0	0	0	0	0	0	0	0	0	0	0	0	0	0	179	0	0	0	0	0	0	0	0	0	0	0	0	0	0	0	0	0	0	0	0	0
8a2bce25d06f29ffedbb40b738714cbf	0	0	0	0	0	0	0	0	0	0	0	0	0	0	0	0	0	0	0	0	0	0	0	0	178	0	0	0	0	0	0	0	0	0	0	0	0
f659dd4ff0fac85ec37a1bedd2946721	0	0	0	0	170	0	0	0	0	0	0	0	0	0	0	0	0	0	0	0	0	0	0	0	0	0	0	7	0	0	0	0	0	0	0	0	0
9da29b57b06e3cccd12f5c6ab33126ed	0	0	0	0	0	0	0	0	0	0	0	0	0	0	0	0	0	0	0	0	0	0	0	32	18	127	0	0	0	0	0	0	0	0	0	0	0
76b65467996e7f950e8165e8c38d1da3	0	27	0	0	0	0	0	0	0	0	0	0	0	0	0	0	0	0	0	0	0	0	0	0	149	0	0	0	0	0	0	0	0	0	0	0	0
61cd1abfe6c82591691b3930fecbf246	176	0	0	0	0	0	0	0	0	0	0	0	0	0	0	0	0	0	0	0	0	0	0	0	0	0	0	0	0	0	0	0	0	0	0	0	0
61824a36a527a0662f1a32cf859b60a3	0	0	0	0	0	0	0	0	0	0	0	0	0	0	0	0	0	0	0	0	0	0	0	0	0	0	0	0	0	0	176	0	0	0	0	0	0
af99dcd485570ac6cd9b9364be9c8ed0	0	0	0	0	0	0	0	0	0	0	0	0	0	0	0	0	51	0	0	0	0	0	0	0	0	0	0	0	0	0	0	0	0	0	124	0	0
936e1f37b149b0e1874c881a65d89913	6	0	0	0	128	0	0	0	0	30	0	0	0	0	0	0	0	0	0	0	0	0	0	0	0	0	0	0	0	0	0	0	0	0	0	0	11
e3c684c33a8927364c82f76415878489	0	0	0	0	0	0	0	174	0	0	0	0	0	0	0	0	0	0	0	0	0	0	0	0	0	0	0	0	0	0	0	0	0	0	0	0	0
4b9d4b388308eddbd307122d5759b841	0	0	0	0	0	0	0	0	0	0	0	0	0	0	174	0	0	0	0	0	0	0	0	0	0	0	0	0	0	0	0	0	0	0	0	0	0
307a3127de99cf66faf7058438f1d305	0	0	0	0	0	0	0	173	0	0	0	0	0	0	0	0	0	0	0	0	0	0	0	0	0	0	0	0	0	0	0	0	0	0	0	0	0
877cd7d391fda10068e556033fb4813b	0	0	0	0	0	0	0	0	0	0	0	0	0	0	0	0	0	0	0	0	0	0	0	0	0	0	0	0	0	0	0	0	0	0	0	172	0
f287a44ce53102a4285fe91cfbc4a8c9	85	0	0	0	0	0	0	0	0	0	0	0	0	0	0	0	0	0	0	0	0	14	0	0	0	0	0	37	0	0	0	0	16	0	0	18	0
03989f68c1ae1ca036ee0c534575ba1b	0	0	0	0	0	0	0	0	0	0	0	0	0	0	0	0	0	0	0	0	0	170	0	0	0	0	0	0	0	0	0	0	0	0	0	0	0
c739817b1ed3cd6b7d4cf8173c6c5522	0	0	0	0	0	0	0	0	0	0	0	0	0	0	0	0	0	0	0	0	0	0	0	0	0	0	0	0	0	169	0	0	0	0	0	0	0
a44fe7bb59db4643864ba4ceb92e1ff3	0	0	0	0	0	0	0	0	0	0	0	0	0	0	0	0	0	0	0	0	0	0	0	0	0	0	0	0	0	0	169	0	0	0	0	0	0
69963cd0e51aa12fdde9b297d898aec1	0	0	0	130	0	0	0	0	0	0	38	0	0	0	0	0	0	0	0	0	0	0	0	0	0	0	0	0	0	0	0	0	0	0	0	0	0
0bbe20412684faa2b980b3d4c72fcb41	51	0	0	0	0	0	0	0	0	0	0	0	0	117	0	0	0	0	0	0	0	0	0	0	0	0	0	0	0	0	0	0	0	0	0	0	0
01cffdbb753e07bfeb10ec4a2a82b4a8	0	0	0	0	0	0	0	0	0	0	0	0	0	0	0	0	0	124	0	0	0	0	0	0	0	0	0	0	0	0	44	0	0	0	0	0	0
98680abba6b798652f8620653c09024e	0	0	0	0	0	0	0	0	0	0	0	0	0	0	0	0	0	0	0	0	0	0	0	0	0	0	0	50	0	0	0	0	53	62	0	0	0
6d10fdb3b5475053777b5d236b4702c8	0	62	0	0	0	0	0	0	0	0	0	0	0	0	0	0	0	0	0	0	0	0	0	0	15	0	0	0	0	12	0	76	0	0	0	0	0
bdd1d2e952090a144e5d621997f1b4d5	0	40	0	0	0	0	0	0	0	0	0	0	0	0	0	0	0	0	0	0	0	0	0	0	124	0	0	0	0	0	0	0	0	0	0	0	0
e01fe4d8c7eda1a9fd67fc51de4d1974	0	0	0	33	0	0	0	0	0	0	0	0	0	0	0	10	77	0	0	0	0	0	0	0	9	0	0	0	0	7	0	27	0	0	0	0	0
f8c70deb38f21e7038d14eec748d3730	0	0	0	0	0	0	0	0	0	0	0	0	0	0	0	0	161	0	0	0	0	0	0	0	0	0	0	0	0	0	0	0	0	0	0	0	0
c028f735ef08692892ac3e2994315f05	0	0	0	0	0	0	0	0	0	161	0	0	0	0	0	0	0	0	0	0	0	0	0	0	0	0	0	0	0	0	0	0	0	0	0	0	0
bb061ec340acfb24a8eb90db8c278209	0	0	0	0	0	0	0	0	0	154	0	7	0	0	0	0	0	0	0	0	0	0	0	0	0	0	0	0	0	0	0	0	0	0	0	0	0
8e4f974a22dc33a722cab8f2d00380d6	0	161	0	0	0	0	0	0	0	0	0	0	0	0	0	0	0	0	0	0	0	0	0	0	0	0	0	0	0	0	0	0	0	0	0	0	0
17922d971bb78fe81d5d4a9e99c869b3	86	3	0	0	5	0	0	0	0	58	0	0	0	0	0	0	0	0	0	6	0	0	0	0	0	0	0	0	0	0	0	3	0	0	0	0	0
72d0ef046ff8e0927ab93617210db156	0	107	0	0	0	0	0	0	0	0	0	0	0	0	0	0	0	0	30	0	0	0	0	0	0	0	23	0	0	0	0	0	0	0	0	0	0
eed973dc904b5dbca53157f25f291050	0	0	0	0	0	0	0	0	0	0	0	0	0	0	0	0	0	0	0	0	0	0	0	0	0	0	0	0	0	0	85	0	74	0	0	0	0
db10b83b1c817bd62916f7797172d3b7	0	0	0	0	0	0	0	47	0	0	0	0	0	0	112	0	0	0	0	0	0	0	0	0	0	0	0	0	0	0	0	0	0	0	0	0	0
bf633c035c478dc705deb007a64b6ff1	0	0	0	0	0	0	159	0	0	0	0	0	0	0	0	0	0	0	0	0	0	0	0	0	0	0	0	0	0	0	0	0	0	0	0	0	0
293d5cad7d8afe92e8d57675e4772a7a	0	27	0	0	0	0	0	0	0	0	0	0	0	8	0	0	0	0	0	0	0	0	0	0	0	0	0	0	0	0	0	3	68	13	0	40	0
ed8a5debf430281b670b0a4ffceb9dec	0	0	0	0	0	0	0	0	0	0	0	0	0	0	0	0	0	0	0	0	0	0	0	0	0	0	0	0	0	0	158	0	0	0	0	0	0
cfdf7a392b5c3111dcccbd64a69b85ca	0	19	0	0	0	0	0	0	0	0	0	0	0	0	0	0	0	0	0	0	0	0	0	0	139	0	0	0	0	0	0	0	0	0	0	0	0
3cdbdca8f9dea5110dd8a80cb4493ceb	0	29	0	0	0	0	0	0	0	0	0	0	0	0	0	0	0	0	0	0	0	0	0	0	124	0	0	0	0	4	0	0	0	0	0	0	0
8a24cdc141f844e7102576d6b8b5b5d6	0	0	0	97	0	0	0	0	0	0	59	0	0	0	0	0	0	0	0	0	0	0	0	0	0	0	0	0	0	0	0	0	0	0	0	0	0
6610dfab2dfa9062e568234a3290fa57	0	0	0	0	0	0	0	0	0	0	0	0	0	0	0	0	0	0	0	0	0	0	0	0	155	0	0	0	0	0	0	0	0	0	0	0	0
dc20a52bdd99f294e57e37ab1e487053	0	0	0	0	0	0	0	0	0	0	0	0	0	0	0	0	0	0	0	0	0	0	0	154	0	0	0	0	0	0	0	0	0	0	0	0	0
b745ba480c4be89c6b8b73f196e0ea63	0	0	0	0	0	0	0	0	0	0	0	0	0	154	0	0	0	0	0	0	0	0	0	0	0	0	0	0	0	0	0	0	0	0	0	0	0
80657ca5369930193176fac83f518f1e	0	22	0	0	0	0	0	0	0	0	0	0	0	81	51	0	0	0	0	0	0	0	0	0	0	0	0	0	0	0	0	0	0	0	0	0	0
7294acd6b077bc03e681b36990cda110	0	0	0	0	0	52	0	0	0	82	0	0	0	0	0	0	0	0	0	0	0	0	0	0	0	0	0	0	0	0	0	0	0	0	0	0	20
5b5bc2f2e9fd7d24d00b15e2cf9ba41c	0	0	0	16	0	0	0	0	0	0	0	0	0	0	0	0	35	0	0	0	0	0	0	0	0	0	0	0	0	0	103	0	0	0	0	0	0
a371588042674293e9bf222332317054	0	0	0	0	0	0	0	32	0	0	51	0	0	0	0	39	0	0	0	0	0	0	0	0	0	0	0	0	31	0	0	0	0	0	0	0	0
3f834bf9b2f35e19e0be12710baa6a93	0	0	0	0	0	0	0	0	0	153	0	0	0	0	0	0	0	0	0	0	0	0	0	0	0	0	0	0	0	0	0	0	0	0	0	0	0
ed29a5d9ffb92f441d0929524abec93f	0	0	0	0	0	0	0	42	0	0	0	0	0	0	110	0	0	0	0	0	0	0	0	0	0	0	0	0	0	0	0	0	0	0	0	0	0
76e72d858816572f535b6f50a10f4073	0	0	0	0	0	0	0	0	0	0	0	0	0	0	0	0	0	0	0	0	0	0	0	0	0	0	0	0	0	17	0	135	0	0	0	0	0
29b4cc3b388cf7b4b19bf93ed43b53f1	0	0	0	0	0	0	0	0	0	0	0	0	0	0	0	0	0	0	0	0	0	0	0	0	0	0	0	0	0	0	0	0	0	0	0	152	0
e127a44d826ae6c2f724c9b9b2e3910d	0	0	0	0	0	19	0	0	0	93	0	0	0	0	0	0	0	0	0	0	0	0	0	0	0	0	0	0	0	0	0	0	0	0	0	0	39
a8e9997095398d7fd138c319f8b983c8	0	0	0	0	0	0	0	0	0	0	0	0	0	0	0	46	0	105	0	0	0	0	0	0	0	0	0	0	0	0	0	0	0	0	0	0	0
5c2b8ee55759cc0c0100395df4abed85	0	0	0	0	0	0	0	0	0	0	0	0	0	151	0	0	0	0	0	0	0	0	0	0	0	0	0	0	0	0	0	0	0	0	0	0	0
58d7dab9ee2797a5d1c273815d82a957	0	0	0	0	0	0	0	0	0	0	0	0	0	0	0	0	0	0	0	0	0	0	0	0	0	0	0	151	0	0	0	0	0	0	0	0	0
23ad54cb366452540e69651d353add3d	0	0	0	0	0	0	145	0	6	0	0	0	0	0	0	0	0	0	0	0	0	0	0	0	0	0	0	0	0	0	0	0	0	0	0	0	0
0d2600c9ebfac983faea5058123cd97d	0	151	0	0	0	0	0	0	0	0	0	0	0	0	0	0	0	0	0	0	0	0	0	0	0	0	0	0	0	0	0	0	0	0	0	0	0
06712b1a360f3ca44dc245209141a404	0	0	0	0	0	0	0	0	0	0	0	0	0	0	0	0	0	0	0	0	0	0	0	0	0	0	0	0	0	0	0	0	0	0	0	0	151
f4582fcdc822a2ba3bc2d39ddb1ec1b6	0	0	0	0	0	0	0	0	0	0	0	0	0	0	0	0	0	0	0	0	0	0	99	0	0	0	0	0	0	0	0	0	51	0	0	0	0
da1fc4c6f156cc80fee34ff475cd09d0	0	0	0	0	0	0	0	0	0	0	0	0	0	0	0	0	0	0	0	0	0	0	0	0	150	0	0	0	0	0	0	0	0	0	0	0	0
134b9bf538190eefdcb0823394a83a18	0	0	0	0	0	0	0	0	0	0	0	0	0	0	0	0	0	0	0	0	0	0	0	150	0	0	0	0	0	0	0	0	0	0	0	0	0
43f14e522a8c57aed38f6f67a28a28af	0	0	0	0	0	0	0	0	0	48	0	0	0	0	0	0	0	0	0	0	0	0	0	28	0	36	0	0	0	0	0	0	0	0	0	0	37
1eb08318c870eb7a4d6e170b50a8affc	0	42	0	0	0	0	0	0	0	0	0	0	0	0	0	0	0	0	0	0	0	0	0	0	107	0	0	0	0	0	0	0	0	0	0	0	0
e72c6ec810d7fd852513ac7313ad6b35	0	0	0	0	0	0	0	0	0	0	0	0	0	0	0	0	0	0	0	0	0	0	0	0	0	0	0	0	0	0	0	0	0	0	148	0	0
c1ac5fa9918a4c036bdd219bb1a9d85a	0	0	0	0	0	0	0	0	0	0	0	0	0	0	0	0	0	0	0	0	0	0	0	0	0	0	0	0	0	0	148	0	0	0	0	0	0
d8eff3f03e5e951f0a2cb016305516c7	0	0	17	0	0	0	0	0	0	0	0	0	0	0	0	130	0	0	0	0	0	0	0	0	0	0	0	0	0	0	0	0	0	0	0	0	0
3c7fbe05f8dafd84c4c53783aa6aec70	0	0	0	0	0	0	0	0	0	0	0	0	0	0	0	0	0	0	0	0	0	0	0	0	0	0	0	0	0	0	0	0	0	0	147	0	0
f2ba5b31a014191e7cd4d7e261db9d61	0	19	0	0	0	0	0	0	0	0	0	0	0	0	0	0	0	0	0	0	0	0	0	0	127	0	0	0	0	0	0	0	0	0	0	0	0
e7b0a60ecbf4fac046ebb4f38356861c	0	0	0	0	0	0	0	0	0	0	0	0	0	146	0	0	0	0	0	0	0	0	0	0	0	0	0	0	0	0	0	0	0	0	0	0	0
a4ee44c2de2e20b34cab9f6f48d6bd99	0	0	0	0	0	0	0	0	0	0	0	0	0	0	0	0	0	146	0	0	0	0	0	0	0	0	0	0	0	0	0	0	0	0	0	0	0
6bab823054e45887bfebebd3a96a5ebf	146	0	0	0	0	0	0	0	0	0	0	0	0	0	0	0	0	0	0	0	0	0	0	0	0	0	0	0	0	0	0	0	0	0	0	0	0
f42b2ce07647c796b9c8c009eef89af9	0	0	112	4	0	0	8	0	0	0	0	0	0	6	0	0	0	0	0	15	0	0	0	0	0	0	0	0	0	0	0	0	0	0	0	0	0
ceaed2c449a8bd295e45d430d8531c69	0	0	2	0	0	0	0	0	0	0	121	0	0	0	0	3	0	0	0	0	0	0	0	0	0	0	0	0	0	0	0	0	19	0	0	0	0
c0a19cb6f85e73669e1cbde09dcdf326	0	0	0	0	0	0	0	0	0	0	0	0	0	0	0	0	0	0	0	0	0	0	0	145	0	0	0	0	0	0	0	0	0	0	0	0	0
0b0a4bdddb823efeb9984bf862fe81f8	29	9	0	11	0	0	0	0	0	14	0	0	0	9	3	0	0	0	0	10	0	0	0	0	0	12	0	6	0	24	0	0	18	0	0	0	0
ed7bfdc59845a1cc5c14f1b65614cf7e	0	0	0	0	0	0	0	0	0	46	0	0	0	0	0	0	0	0	0	0	0	98	0	0	0	0	0	0	0	0	0	0	0	0	0	0	0
d1ea21fc5d9e6b4573b1f86b46056bd3	0	0	0	0	0	0	0	0	144	0	0	0	0	0	0	0	0	0	0	0	0	0	0	0	0	0	0	0	0	0	0	0	0	0	0	0	0
7877f66605a8c5bdf29a1ce63911d290	0	0	0	0	0	0	0	0	0	0	0	0	0	0	0	0	0	0	0	0	0	0	0	0	0	0	0	0	0	0	0	0	0	21	123	0	0
4c54d880dee9627cbb5dc7a9ba3c0fa4	0	0	0	0	0	0	0	0	0	0	0	0	0	0	0	0	0	0	0	0	0	0	0	0	0	0	0	39	0	0	62	3	0	40	0	0	0
24ef840a9003488a600517f6c383b675	0	0	0	0	0	0	0	0	0	0	0	0	0	0	0	0	0	0	0	0	0	0	0	0	0	0	0	0	0	0	0	0	0	0	144	0	0
edb41fa68119a44d76cdef87991b23bd	0	0	0	0	0	0	0	0	141	0	0	2	0	0	0	0	0	0	0	0	0	0	0	0	0	0	0	0	0	0	0	0	0	0	0	0	0
9ee8ee9a177c2cdb8a8416b1e1a99b99	29	0	0	0	0	0	0	0	0	7	0	0	0	36	0	0	0	0	0	0	0	0	0	0	0	71	0	0	0	0	0	0	0	0	0	0	0
1ec2ef19cb5199931f730bd35ab82e1c	142	0	0	0	0	0	0	0	0	0	0	0	0	0	0	0	0	0	0	0	0	0	0	0	0	0	0	0	0	0	0	0	0	0	0	0	0
d0794818fa96b64feb03db5341f4b0f5	0	0	0	0	0	0	0	0	0	0	0	0	0	0	0	0	0	0	0	0	0	0	0	0	0	0	0	0	0	0	0	0	0	140	0	0	0
b34c437d25ca83aee2223c58cfbaa537	0	0	0	0	0	0	0	0	0	123	0	0	0	0	0	0	0	0	0	0	0	0	0	0	0	0	0	0	0	0	0	0	0	0	0	0	17
b0538ad301d56404efc03a93e4b4c450	0	0	0	0	0	0	0	0	0	0	0	0	0	0	0	0	0	0	0	0	0	0	0	0	0	0	0	0	0	0	0	0	140	0	0	0	0
4498999bd1eaa70174ad237a767f0ce0	0	0	0	0	0	0	0	0	0	0	0	0	0	0	140	0	0	0	0	0	0	0	0	0	0	0	0	0	0	0	0	0	0	0	0	0	0
f0d0964a3dd429534256cdd082f7a0fe	0	0	0	0	0	0	0	0	0	139	0	0	0	0	0	0	0	0	0	0	0	0	0	0	0	0	0	0	0	0	0	0	0	0	0	0	0
9f960ad67141e62321bc575ecb8a7b64	0	0	0	0	0	0	0	0	0	0	139	0	0	0	0	0	0	0	0	0	0	0	0	0	0	0	0	0	0	0	0	0	0	0	0	0	0
9593b823e8fe7e563dcae1a373958684	0	138	0	0	0	0	0	0	0	0	0	0	0	0	0	0	0	0	0	0	0	0	0	0	0	0	0	0	0	0	0	0	0	0	0	0	0
8daa523f04525342ad51fa18ec37b112	0	0	0	0	0	0	0	0	0	0	0	0	0	0	0	0	0	0	0	0	0	0	0	0	0	0	0	0	0	138	0	0	0	0	0	0	0
356b5379bed7407d6e47ba0c8d71c784	0	0	0	0	0	0	0	0	0	0	0	0	0	0	0	0	0	0	0	0	0	0	0	0	0	0	0	0	0	0	137	0	0	0	0	0	0
41d8d7d2b53f0f170c56132f23d5704b	136	0	0	0	0	0	0	0	0	0	0	0	0	0	0	0	0	0	0	0	0	0	0	0	0	0	0	0	0	0	0	0	0	0	0	0	0
404e6977f86aeac9d5c7a30ee7293566	0	0	0	0	0	0	0	0	0	136	0	0	0	0	0	0	0	0	0	0	0	0	0	0	0	0	0	0	0	0	0	0	0	0	0	0	0
3ba60025d4489d006031e27784f8e969	0	0	0	0	0	0	0	0	0	0	0	0	0	0	0	0	0	0	0	0	0	0	0	23	0	0	0	76	0	0	13	0	0	0	0	0	24
562325bd5f9f811ede4d588cc1e2e562	0	0	0	0	0	5	0	33	0	0	69	22	0	0	0	0	0	0	0	6	0	0	0	0	0	0	0	0	0	0	0	0	0	0	0	0	0
dce74b698e484019f54cfe3e963693de	0	0	0	0	0	0	0	0	0	0	0	0	0	0	0	0	0	0	0	0	0	0	0	0	0	0	0	0	0	0	0	0	0	134	0	0	0
57bc3834bfa81fd31ac5f4ae4dc372e0	0	0	0	0	0	0	0	0	0	0	0	0	0	0	0	0	0	0	0	0	0	0	0	0	134	0	0	0	0	0	0	0	0	0	0	0	0
fe7148d42912429a9515baff5b8ab20d	0	0	0	0	0	0	0	0	0	0	0	0	0	0	0	0	0	0	0	0	0	0	0	30	103	0	0	0	0	0	0	0	0	0	0	0	0
548b5eee80336a1cb5091aa7a2f1254d	0	0	0	0	0	0	0	0	133	0	0	0	0	0	0	0	0	0	0	0	0	0	0	0	0	0	0	0	0	0	0	0	0	0	0	0	0
3acf49cfe9a425a12aac5c9c6cbb276d	0	0	0	66	0	0	0	0	0	0	0	0	0	0	0	0	0	0	0	0	0	0	0	0	0	0	0	0	0	0	67	0	0	0	0	0	0
161d9e56eae994539634f8e73f7d280e	0	0	133	0	0	0	0	0	0	0	0	0	0	0	0	0	0	0	0	0	0	0	0	0	0	0	0	0	0	0	0	0	0	0	0	0	0
030493db71cda3a38074e812119bee2e	0	0	0	0	0	0	0	0	0	0	0	0	0	0	0	0	0	0	0	0	0	0	0	0	0	0	133	0	0	0	0	0	0	0	0	0	0
43eddbff95726176fd15a3826ef0913d	0	0	0	0	0	0	0	0	0	0	0	0	0	0	0	0	0	0	0	0	0	0	0	0	0	0	0	132	0	0	0	0	0	0	0	0	0
fa3c6a619bd317f33fbaee782cf4c013	131	0	0	0	0	0	0	0	0	0	0	0	0	0	0	0	0	0	0	0	0	0	0	0	0	0	0	0	0	0	0	0	0	0	0	0	0
beeecb2e2f136fd892cadd783f242fff	0	0	0	0	0	0	0	0	0	0	0	0	0	0	0	0	0	0	0	0	0	0	0	0	131	0	0	0	0	0	0	0	0	0	0	0	0
a3adba5035b09739c34d28ab4736b028	0	0	0	0	0	0	0	0	0	0	0	0	0	0	0	0	0	0	0	0	0	38	0	0	0	0	0	0	0	0	0	0	93	0	0	0	0
2d07443a767f90870aac3d4eb1df1a47	0	26	7	0	0	0	0	0	0	3	0	62	0	0	0	0	0	0	0	0	0	0	16	0	0	15	0	0	0	0	0	0	0	0	2	0	0
9d8b3375d88a5e9cd6b5d130735f180e	0	0	0	0	0	0	0	0	0	0	0	0	0	0	0	0	0	0	0	0	0	0	0	0	130	0	0	0	0	0	0	0	0	0	0	0	0
788b3b5477188407a87532eec81dd886	0	0	0	13	12	0	0	26	2	0	6	2	0	7	4	3	0	5	0	0	0	5	0	5	9	0	0	0	0	0	5	7	4	0	7	3	5
5bb9541bb4e7e0ba75e771e278c592ee	0	53	0	0	0	0	0	0	0	0	0	0	0	0	0	0	0	0	0	0	0	0	0	0	77	0	0	0	0	0	0	0	0	0	0	0	0
50cabfcfdcbc6b7ad7054ca7abc0cd07	0	0	0	0	0	0	0	0	0	0	0	0	0	0	0	0	0	0	0	130	0	0	0	0	0	0	0	0	0	0	0	0	0	0	0	0	0
4c76b4600c50be186a16a30a835d3c7c	0	0	0	0	0	0	0	0	0	0	0	0	0	0	0	0	0	0	0	0	0	64	0	0	0	0	0	0	0	0	0	0	0	0	0	65	0
845252b0c2bd900fcaaf4e62d7b1a361	0	0	0	0	0	0	0	0	0	0	0	0	0	0	0	0	0	0	0	29	0	0	0	0	0	0	0	0	0	0	0	0	99	0	0	0	0
77ec5b23143cb869f6cc6b136ceaac3b	0	0	0	0	128	0	0	0	0	0	0	0	0	0	0	0	0	0	0	0	0	0	0	0	0	0	0	0	0	0	0	0	0	0	0	0	0
70e9ce5b912d9b858e737beb028a6322	0	0	0	0	0	0	0	0	0	0	35	4	0	23	0	46	0	0	0	5	0	0	0	0	0	0	3	0	0	0	4	0	8	0	0	0	0
64817a52f1de6eab8e25f082bf50ca8b	0	0	0	0	0	0	0	0	0	128	0	0	0	0	0	0	0	0	0	0	0	0	0	0	0	0	0	0	0	0	0	0	0	0	0	0	0
fd18adc94062b7bc32bfaed30272d4ed	0	76	0	0	0	0	0	0	0	0	0	0	0	0	0	0	0	0	0	0	0	0	0	0	21	0	0	0	0	15	0	10	0	5	0	0	0
15ef7de3ec710be7b6f87393e2cc48c2	0	0	0	127	0	0	0	0	0	0	0	0	0	0	0	0	0	0	0	0	0	0	0	0	0	0	0	0	0	0	0	0	0	0	0	0	0
4624a842468c1b909e84f3e56a9807a8	0	0	0	0	0	0	0	0	0	43	0	0	0	0	28	0	0	0	0	0	0	55	0	0	0	0	0	0	0	0	0	0	0	0	0	0	0
cfbdfe0c2accd99e615bff423a6cdd05	0	0	0	0	0	0	0	0	0	0	0	0	0	0	40	0	0	0	0	0	0	0	0	85	0	0	0	0	0	0	0	0	0	0	0	0	0
e664a1557b8cdaa75e22b2822678c804	0	0	0	0	0	0	123	0	0	0	0	0	0	0	0	0	0	0	0	0	0	0	0	0	0	0	0	0	0	0	0	0	0	0	0	0	0
e03564e82b5d1ba8c71e742e11e8ebef	123	0	0	0	0	0	0	0	0	0	0	0	0	0	0	0	0	0	0	0	0	0	0	0	0	0	0	0	0	0	0	0	0	0	0	0	0
99ac1dc33cb11377a8c227b7504e969c	0	0	0	0	0	0	0	0	0	0	0	0	0	0	0	0	0	0	0	0	0	0	0	0	0	0	0	0	0	0	0	0	0	65	58	0	0
5959848026e919678bc069e1604c0376	0	0	0	0	0	0	0	0	0	123	0	0	0	0	0	0	0	0	0	0	0	0	0	0	0	0	0	0	0	0	0	0	0	0	0	0	0
3c7b5f99a744bf38e3c060418a301581	123	0	0	0	0	0	0	0	0	0	0	0	0	0	0	0	0	0	0	0	0	0	0	0	0	0	0	0	0	0	0	0	0	0	0	0	0
cf4574941ac73190570f2313715f804c	0	108	0	0	0	0	0	0	0	0	0	0	0	0	0	0	0	0	0	0	0	0	0	0	14	0	0	0	0	0	0	0	0	0	0	0	0
c297d9e1c143b7b9e81f4e4e50edf57e	0	0	0	0	0	0	0	0	0	0	0	0	0	0	0	0	0	0	0	0	0	0	0	56	0	66	0	0	0	0	0	0	0	0	0	0	0
aec6648645f28f5e8d816642f4a5530b	0	0	0	0	0	0	0	0	0	0	122	0	0	0	0	0	0	0	0	0	0	0	0	0	0	0	0	0	0	0	0	0	0	0	0	0	0
90f5bd8f24fc05da399535ed9042946d	0	0	0	0	0	0	0	0	0	0	0	0	0	0	0	0	0	0	0	122	0	0	0	0	0	0	0	0	0	0	0	0	0	0	0	0	0
f0770d4cd34f67eb3f7e97b0371c317e	0	0	0	0	0	0	0	0	0	0	0	0	0	0	0	0	0	0	0	0	121	0	0	0	0	0	0	0	0	0	0	0	0	0	0	0	0
b1bb16c4de2dbf063d761b6a230125c9	0	31	0	0	0	0	0	0	0	0	0	0	0	0	0	0	0	0	0	0	0	0	0	0	90	0	0	0	0	0	0	0	0	0	0	0	0
78337ced3d6c2a51b4088f0acccb72b1	0	0	0	0	0	0	0	0	0	121	0	0	0	0	0	0	0	0	0	0	0	0	0	0	0	0	0	0	0	0	0	0	0	0	0	0	0
d204b9699e2221e858dd175d18cc330c	2	0	0	0	0	2	0	13	0	0	0	6	0	0	0	0	0	0	0	0	0	0	0	0	40	8	0	0	0	0	0	25	15	0	0	0	9
a5bd85f6c3b255b5c6b24e6edea3f328	0	0	0	0	0	0	0	0	0	0	0	0	0	21	0	0	0	0	0	0	0	0	0	0	0	0	34	0	0	0	0	0	7	0	58	0	0
50762d000edc3977000e694c6d4b6736	0	0	0	0	0	0	0	0	0	0	0	0	0	0	0	0	0	0	0	0	0	0	0	0	0	0	0	11	0	40	0	0	64	5	0	0	0
3a71aa28834100eb6c2ebc1b261f6279	0	13	0	0	0	0	0	0	0	0	0	0	0	0	0	0	0	0	0	0	0	0	0	0	0	0	0	0	0	11	0	96	0	0	0	0	0
2e6407e0566972b5acf74a25246d8061	0	0	0	0	0	0	0	0	0	0	0	0	0	0	0	0	0	0	0	0	0	0	0	0	0	0	0	0	0	0	0	0	0	0	0	0	120
26bb3741155e4bef0be055a76fe3d7dc	0	0	0	0	0	0	0	3	7	0	7	0	0	0	0	0	0	0	70	0	0	0	0	6	0	3	7	0	0	0	8	0	3	6	0	0	0
d8e15a607f95538a0589ca49eeee2164	0	48	0	0	0	0	0	0	0	0	0	0	0	0	0	0	0	0	0	0	0	0	0	0	71	0	0	0	0	0	0	0	0	0	0	0	0
e535ffa082150d21bb9781f2f2724c9d	0	0	0	0	0	0	0	0	0	0	0	0	0	0	0	0	0	0	0	0	0	0	0	0	0	118	0	0	0	0	0	0	0	0	0	0	0
091659d932ea23f71f19e261fcf41a70	0	0	0	0	0	0	0	0	0	0	0	0	0	0	0	0	0	0	0	0	0	0	0	0	0	0	0	0	0	0	0	0	0	0	118	0	0
3c1e09d94adad63432a77ad4c683abfb	0	0	0	0	0	0	0	0	0	0	0	0	0	78	0	0	0	0	0	0	0	0	0	0	0	0	0	0	0	0	0	0	39	0	0	0	0
bdf6f045392931580142039eabb9a1f7	0	0	0	0	43	0	0	37	23	0	0	0	0	5	8	0	0	0	0	0	0	0	0	0	0	0	0	0	0	0	0	0	0	0	0	0	0
5010183d99263d92d2aee1f080039f29	0	0	0	0	0	0	0	0	0	116	0	0	0	0	0	0	0	0	0	0	0	0	0	0	0	0	0	0	0	0	0	0	0	0	0	0	0
be574507e04b753fd1c5f8225e8108f5	0	0	0	0	0	0	0	0	43	0	0	0	0	0	0	0	0	0	0	0	0	0	0	0	72	0	0	0	0	0	0	0	0	0	0	0	0
b9ccb01e572a62451498d77b5262ccfc	0	31	0	0	0	0	0	0	0	0	0	0	0	0	0	0	0	0	0	0	0	0	0	0	84	0	0	0	0	0	0	0	0	0	0	0	0
3518ca2ab5eed66efd0b46ab85600fad	0	0	0	0	0	0	0	0	0	0	0	0	0	115	0	0	0	0	0	0	0	0	0	0	0	0	0	0	0	0	0	0	0	0	0	0	0
ea703651d078d64e66293338f6f5efbb	0	114	0	0	0	0	0	0	0	0	0	0	0	0	0	0	0	0	0	0	0	0	0	0	0	0	0	0	0	0	0	0	0	0	0	0	0
ad71183fec237f6ef63cfb40dc3d0796	0	0	0	114	0	0	0	0	0	0	0	0	0	0	0	0	0	0	0	0	0	0	0	0	0	0	0	0	0	0	0	0	0	0	0	0	0
8aa54b10f55461b274d7aaf91a8b8b2a	0	0	0	0	0	0	0	0	0	20	0	0	0	0	0	0	0	0	0	0	0	0	0	0	0	0	0	0	0	0	0	0	0	0	0	94	0
865acc021e2537d628f71fe3cda031d4	0	0	0	0	0	0	0	0	0	0	0	0	0	0	0	0	0	0	0	0	0	0	0	0	15	0	0	0	0	0	0	99	0	0	0	0	0
474df462b484734264e33d1ce7894f22	0	0	0	0	6	0	0	6	0	0	0	0	0	0	0	0	0	0	0	0	0	0	0	0	102	0	0	0	0	0	0	0	0	0	0	0	0
143025880ed05ee36360f5a64e79a4c3	0	43	0	0	0	0	0	0	0	0	0	0	0	0	0	0	0	0	0	0	0	0	0	0	9	0	0	0	0	27	0	32	0	3	0	0	0
54c9c0413da30330d633b0b03f45dd27	0	113	0	0	0	0	0	0	0	0	0	0	0	0	0	0	0	0	0	0	0	0	0	0	0	0	0	0	0	0	0	0	0	0	0	0	0
db98e82bc10beb41d9c72c140df86d78	112	0	0	0	0	0	0	0	0	0	0	0	0	0	0	0	0	0	0	0	0	0	0	0	0	0	0	0	0	0	0	0	0	0	0	0	0
d5e6ffabcabd8faf26a10e61a42aeab7	0	0	0	0	0	0	0	0	0	0	30	0	0	0	0	0	0	0	0	82	0	0	0	0	0	0	0	0	0	0	0	0	0	0	0	0	0
9a7563b985984233bda3dab723a53641	112	0	0	0	0	0	0	0	0	0	0	0	0	0	0	0	0	0	0	0	0	0	0	0	0	0	0	0	0	0	0	0	0	0	0	0	0
9290817217e8c3c5a902d88d565f0a6a	0	0	0	0	0	0	0	0	0	112	0	0	0	0	0	0	0	0	0	0	0	0	0	0	0	0	0	0	0	0	0	0	0	0	0	0	0
2e062e00fa5cb2d6a95c90545b6b64d6	0	12	0	0	0	0	0	0	0	0	0	0	0	0	0	0	0	0	0	0	0	0	0	0	100	0	0	0	0	0	0	0	0	0	0	0	0
1c65a119a65845ad2ad4725d487ae939	0	0	0	0	0	0	0	0	0	0	0	0	0	0	0	0	0	0	0	0	0	0	0	0	0	0	0	0	0	71	19	0	22	0	0	0	0
0d0e6b7f346be42e795e6212cd69c464	0	0	0	0	0	0	0	112	0	0	0	0	0	0	0	0	0	0	0	0	0	0	0	0	0	0	0	0	0	0	0	0	0	0	0	0	0
e2536a68ee17074352fde0ce65cfb4e7	0	0	0	0	0	0	0	0	99	0	0	0	0	0	0	0	0	0	0	0	0	0	0	0	12	0	0	0	0	0	0	0	0	0	0	0	0
ba0e9af48540f5eeb3f5966c956073b0	0	0	0	0	0	0	0	0	0	111	0	0	0	0	0	0	0	0	0	0	0	0	0	0	0	0	0	0	0	0	0	0	0	0	0	0	0
a93fc8d4fd9b96bd0e867e849358aff0	0	0	0	0	0	0	0	0	0	0	0	0	0	0	0	0	110	0	0	0	0	0	0	0	0	0	0	0	0	0	0	0	0	0	0	0	0
6e7c1c0655e31625794b3f7a82b36f26	0	0	0	0	0	0	0	0	0	0	110	0	0	0	0	0	0	0	0	0	0	0	0	0	0	0	0	0	0	0	0	0	0	0	0	0	0
e4c2e7d935dc42f9370659d6c6e5629a	0	0	0	0	0	0	0	0	0	0	0	0	0	0	0	0	0	0	0	0	0	0	0	0	109	0	0	0	0	0	0	0	0	0	0	0	0
c4b1a6c00ac6cf3a8a91f193a850ce54	0	0	0	0	0	0	0	0	0	0	0	0	0	0	0	0	0	0	0	109	0	0	0	0	0	0	0	0	0	0	0	0	0	0	0	0	0
ae4f7bedcfc29f247a6c637ae98bf0ee	0	0	0	0	0	0	0	0	0	109	0	0	0	0	0	0	0	0	0	0	0	0	0	0	0	0	0	0	0	0	0	0	0	0	0	0	0
10526f842b52a17071dcb05ce88b44f7	0	25	0	0	0	0	0	0	0	0	0	0	0	0	0	0	0	0	0	0	0	0	0	0	84	0	0	0	0	0	0	0	0	0	0	0	0
0df94e423697e55c9f11b631a661f242	0	7	0	0	0	0	0	99	0	3	0	0	0	0	0	0	0	0	0	0	0	0	0	0	0	0	0	0	0	0	0	0	0	0	0	0	0
068097b8309c42b14cbdf2f47bf047b8	0	0	0	0	0	0	0	0	0	0	0	0	0	0	0	0	0	0	0	0	0	0	0	0	0	0	0	0	0	0	109	0	0	0	0	0	0
df3da73643a55b6e40b8e1dc1133f4ff	0	108	0	0	0	0	0	0	0	0	0	0	0	0	0	0	0	0	0	0	0	0	0	0	0	0	0	0	0	0	0	0	0	0	0	0	0
dc999453e94b1433642ad6986dff8a31	0	0	0	10	0	0	0	7	0	0	0	0	0	0	0	0	3	0	0	0	0	0	0	0	0	0	0	59	0	0	0	0	0	0	29	0	0
b2d03d88a69bb03a36b0d9a37d99d862	0	0	0	0	4	0	5	7	7	10	3	0	0	0	0	3	0	0	0	9	0	5	0	5	12	8	0	0	0	0	5	10	5	0	3	0	7
6359d5bf1976cc3a96c95d4ab7beffc5	0	0	0	0	0	0	0	0	0	0	0	0	0	0	0	0	0	0	0	0	0	0	0	0	0	108	0	0	0	0	0	0	0	0	0	0	0
5fed5bbd39205298401918d5b91d4809	0	108	0	0	0	0	0	0	0	0	0	0	0	0	0	0	0	0	0	0	0	0	0	0	0	0	0	0	0	0	0	0	0	0	0	0	0
568de13d1243cead7b3eddde32fbc32d	0	0	0	0	0	0	0	0	0	108	0	0	0	0	0	0	0	0	0	0	0	0	0	0	0	0	0	0	0	0	0	0	0	0	0	0	0
5418f4d4709d71c106f8b1af16ac916d	0	0	0	0	0	0	0	0	0	0	0	0	0	0	0	0	0	0	0	0	0	0	0	0	108	0	0	0	0	0	0	0	0	0	0	0	0
bebbbe3c8fa3d4033448b752308677b9	0	91	0	0	0	0	0	0	0	0	0	0	0	0	0	0	0	0	0	0	0	0	0	0	0	0	0	0	0	0	0	16	0	0	0	0	0
a526d7201660b93001d014ad84b2965b	0	10	0	0	0	0	0	0	0	0	0	23	0	0	0	0	0	0	0	0	0	0	0	0	0	0	0	0	0	0	74	0	0	0	0	0	0
899c01a9e08f6dfc9c86517daf56e20d	0	0	0	0	0	0	0	0	0	94	0	0	0	0	8	0	0	0	0	0	0	5	0	0	0	0	0	0	0	0	0	0	0	0	0	0	0
6baab5c609837715c4a10fd986e5becd	0	0	0	0	0	0	0	0	0	0	0	0	0	0	0	0	0	0	0	0	12	0	0	63	0	32	0	0	0	0	0	0	0	0	0	0	0
4b8a2135a97ee2d3bbaf5e33da60580c	0	0	0	0	0	0	0	37	9	4	0	0	0	0	0	4	0	0	0	5	0	0	0	8	0	0	35	0	0	5	0	0	0	0	0	0	0
3dd0c5af8219fe26e7e482c091c53bb7	0	0	0	0	107	0	0	0	0	0	0	0	0	0	0	0	0	0	0	0	0	0	0	0	0	0	0	0	0	0	0	0	0	0	0	0	0
d0b73a3b0f25ed1618e040e38d6ad3ab	0	14	0	0	0	0	0	0	0	0	0	0	0	0	0	0	0	0	0	0	0	0	0	0	92	0	0	0	0	0	0	0	0	0	0	0	0
c6b0a5b9a1a88187b5ef543a16575139	0	0	0	0	0	0	0	105	0	0	0	0	0	0	0	0	0	0	0	0	0	0	0	0	0	0	0	0	0	0	0	0	0	0	0	0	0
c41865680f5403a082fb50020b406908	0	0	0	105	0	0	0	0	0	0	0	0	0	0	0	0	0	0	0	0	0	0	0	0	0	0	0	0	0	0	0	0	0	0	0	0	0
b5a08c38140c3ef9f8d4197a6510615f	0	16	0	0	0	0	0	0	0	0	0	0	0	0	0	0	0	0	0	0	0	0	0	0	89	0	0	0	0	0	0	0	0	0	0	0	0
846dec8f0be05fa4998933a666a6cce7	0	0	0	0	39	0	4	45	0	0	0	0	0	0	11	0	0	0	0	0	0	0	0	0	0	0	0	0	0	0	0	0	0	0	0	6	0
606e899e0ce51be5081659d8d0565253	0	0	0	0	0	0	0	0	0	0	0	0	0	0	0	0	0	0	0	0	0	0	0	0	0	0	0	0	0	0	105	0	0	0	0	0	0
541ea986897b9a8c5600bd9d5014565f	0	0	0	0	0	0	0	0	0	0	0	0	0	0	0	105	0	0	0	0	0	0	0	0	0	0	0	0	0	0	0	0	0	0	0	0	0
f4edcdcf9a305c1560bf2594fc8a9d84	0	0	0	0	0	0	0	0	0	0	0	0	0	0	0	0	0	104	0	0	0	0	0	0	0	0	0	0	0	0	0	0	0	0	0	0	0
d46ad2e36d880ed56b7940fa9ac2043e	0	0	0	0	0	0	0	0	102	0	2	0	0	0	0	0	0	0	0	0	0	0	0	0	0	0	0	0	0	0	0	0	0	0	0	0	0
b3383fea1ccd9c7bb6348d6301a49aff	0	0	0	0	0	0	0	0	0	0	0	0	0	0	104	0	0	0	0	0	0	0	0	0	0	0	0	0	0	0	0	0	0	0	0	0	0
aa2883b46705f8234fc6877a7bb3ced3	0	0	0	0	52	0	0	20	7	0	0	0	0	0	0	0	0	0	0	4	0	0	0	5	0	0	16	0	0	0	0	0	0	0	0	0	0
9e36e38769a55ebbb6aded590a10a3b4	0	0	0	0	0	0	0	0	0	0	0	0	0	0	0	0	0	0	0	0	0	0	0	0	0	0	0	0	0	0	104	0	0	0	0	0	0
4af5779454c7360ea95bcc5aed93d7da	0	0	0	0	0	0	0	0	0	0	0	0	0	0	104	0	0	0	0	0	0	0	0	0	0	0	0	0	0	0	0	0	0	0	0	0	0
4734c603709b03ce4b989bb28ea47baf	0	41	0	0	0	0	0	0	0	0	0	0	0	0	0	0	0	0	0	0	0	0	0	0	9	0	0	0	0	45	0	9	0	0	0	0	0
169226bd39095ca2092bd722ab92acff	0	12	0	17	0	0	0	0	0	19	0	0	0	0	0	0	0	0	0	14	0	5	0	0	0	14	0	0	0	0	0	0	23	0	0	0	0
d6974837c7368620445063ec1330e800	0	0	0	0	0	0	0	0	0	0	0	0	0	0	0	0	0	103	0	0	0	0	0	0	0	0	0	0	0	0	0	0	0	0	0	0	0
acb758ac54e7363feeb7925a5235edb7	0	0	0	0	0	0	0	0	0	0	0	0	0	0	0	0	0	0	0	92	0	0	0	0	0	0	0	0	0	0	0	0	11	0	0	0	0
979f1d26c33959f8c59050c329b00221	0	0	0	0	0	0	0	0	0	0	0	0	0	0	0	0	0	0	0	103	0	0	0	0	0	0	0	0	0	0	0	0	0	0	0	0	0
c9c37d33290c56a070ff615d6b56f72b	0	0	0	102	0	0	0	0	0	0	0	0	0	0	0	0	0	0	0	0	0	0	0	0	0	0	0	0	0	0	0	0	0	0	0	0	0
10bfa5f01673ea13cd5a1a51f38056ed	34	0	0	0	0	0	0	0	0	68	0	0	0	0	0	0	0	0	0	0	0	0	0	0	0	0	0	0	0	0	0	0	0	0	0	0	0
025a60319131d4b2164a67d28aa38c63	0	0	0	0	0	0	0	0	0	0	0	0	0	0	0	0	0	0	0	0	0	0	0	0	0	102	0	0	0	0	0	0	0	0	0	0	0
c7aeaa64bcd8651a3ae37275cebf9bab	0	65	0	0	0	0	0	0	0	0	0	0	0	0	0	0	0	0	22	0	0	0	0	0	0	0	14	0	0	0	0	0	0	0	0	0	0
606403e8fc465ec3ec0ac96e2c6f1081	0	0	0	0	0	0	0	0	0	0	0	0	0	0	0	101	0	0	0	0	0	0	0	0	0	0	0	0	0	0	0	0	0	0	0	0	0
43c3bf410f10ffe1e67873a566b1f445	0	101	0	0	0	0	0	0	0	0	0	0	0	0	0	0	0	0	0	0	0	0	0	0	0	0	0	0	0	0	0	0	0	0	0	0	0
0326e775c72cd9be61700d9885ecc3bb	0	0	0	0	0	0	0	101	0	0	0	0	0	0	0	0	0	0	0	0	0	0	0	0	0	0	0	0	0	0	0	0	0	0	0	0	0
b743dea0574f8088dc51a8d7604207d5	0	0	0	0	0	0	0	0	0	0	5	0	0	0	0	0	0	0	0	0	0	60	5	0	0	5	15	0	0	0	0	0	0	10	0	0	0
ac53ef28de3488db8807d834a6d36306	0	0	0	0	0	0	0	23	0	0	0	0	0	0	77	0	0	0	0	0	0	0	0	0	0	0	0	0	0	0	0	0	0	0	0	0	0
759d1434187cff3851b25307c3da77da	0	0	83	6	0	0	0	0	0	0	0	0	0	0	9	0	2	0	0	0	0	0	0	0	0	0	0	0	0	0	0	0	0	0	0	0	0
131b50985669d19c99ac701177e0082b	0	0	0	0	0	0	0	0	0	0	0	0	0	9	0	0	0	0	0	0	0	0	0	0	0	0	0	0	0	80	11	0	0	0	0	0	0
01d2c7c9ec270f7fe5bac3f32285591a	0	100	0	0	0	0	0	0	0	0	0	0	0	0	0	0	0	0	0	0	0	0	0	0	0	0	0	0	0	0	0	0	0	0	0	0	0
d494bd4fa2ac94f43e71d9770de88060	0	0	0	0	0	0	0	0	0	0	65	0	34	0	0	0	0	0	0	0	0	0	0	0	0	0	0	0	0	0	0	0	0	0	0	0	0
921ff496bafc811ded376eed59f7154b	0	0	0	0	0	0	0	0	0	0	0	0	0	0	99	0	0	0	0	0	0	0	0	0	0	0	0	0	0	0	0	0	0	0	0	0	0
664e8cfe10825f9ab2f3d2ac3889d14a	0	0	2	0	10	0	3	9	0	4	2	0	4	7	4	4	9	4	0	0	4	2	8	0	5	0	0	0	0	0	3	0	3	0	3	9	0
f64c5c7e3515b4f57462166c68454833	0	0	0	0	0	0	0	0	0	0	98	0	0	0	0	0	0	0	0	0	0	0	0	0	0	0	0	0	0	0	0	0	0	0	0	0	0
efd5549e684f9f5d9ca83677fa780487	0	0	0	0	0	0	0	98	0	0	0	0	0	0	0	0	0	0	0	0	0	0	0	0	0	0	0	0	0	0	0	0	0	0	0	0	0
af6f55ba0d983007d41073322492fb43	0	0	0	0	0	0	0	0	0	0	0	0	0	0	0	0	0	0	0	0	0	0	0	0	0	0	0	0	0	0	0	0	0	0	0	98	0
9b38e0b68919d662b05506e359175f22	0	0	91	0	7	0	0	0	0	0	0	0	0	0	0	0	0	0	0	0	0	0	0	0	0	0	0	0	0	0	0	0	0	0	0	0	0
8a616eaa4e2af63c762bbe30febaf7fd	0	0	0	0	0	0	0	0	0	0	0	0	0	0	0	0	0	0	0	0	0	34	0	0	0	0	0	9	0	0	39	0	0	0	0	0	16
7bd89f842570aefdf908f164b4c5e20f	11	0	0	15	0	0	0	10	0	0	53	0	0	0	0	9	0	0	0	0	0	0	0	0	0	0	0	0	0	0	0	0	0	0	0	0	0
710bb36a1774441512d4d439797230f5	0	0	0	0	0	0	0	0	0	0	0	0	0	0	0	0	0	0	0	0	0	0	0	38	0	22	0	38	0	0	0	0	0	0	0	0	0
42f98f23417e0aa0066c3c55e9424074	0	0	0	0	0	0	0	0	0	0	0	0	0	0	0	0	0	0	0	0	0	0	0	0	0	0	0	0	0	0	0	0	0	98	0	0	0
364019b843a41021f13cb817b942505a	0	0	0	0	0	0	0	0	0	0	0	0	0	0	0	0	0	0	0	0	0	0	0	0	0	0	0	0	0	0	0	0	0	0	0	98	0
e8d0e9a0511aa9bcd4af9f22cb1c298a	0	97	0	0	0	0	0	0	0	0	0	0	0	0	0	0	0	0	0	0	0	0	0	0	0	0	0	0	0	0	0	0	0	0	0	0	0
af8f378b13f82d6728883e0b8f8121a1	0	17	0	0	0	0	0	0	2	0	0	0	0	0	0	0	0	0	0	0	0	0	0	0	69	0	0	0	0	0	0	9	0	0	0	0	0
7f5d1a7b7b201cf96bbabb2b01300bad	47	0	0	0	0	24	0	0	0	0	0	0	0	0	0	0	0	0	0	0	0	0	0	0	0	0	0	0	0	0	0	0	0	0	0	0	26
31e4a0ac68a66f70cd75b621da6dfb2d	0	0	0	0	0	0	0	0	0	0	0	0	0	0	0	0	0	0	0	0	0	0	0	0	97	0	0	0	0	0	0	0	0	0	0	0	0
20e27b3a936b0466318f17b26bf68374	67	0	0	0	0	0	0	0	0	0	0	0	0	0	0	0	0	0	0	0	0	0	0	0	0	0	0	0	0	0	0	0	13	0	0	0	17
9060f5328db40ffbc2f73c7bc20fce87	0	0	0	0	0	0	0	0	0	0	0	0	0	0	96	0	0	0	0	0	0	0	0	0	0	0	0	0	0	0	0	0	0	0	0	0	0
6bd6e0cc4a06f77c1eb3919ebc85fede	0	0	0	0	0	0	0	0	0	0	0	0	0	0	0	0	0	0	0	0	0	0	0	0	0	0	96	0	0	0	0	0	0	0	0	0	0
64025ddb0b2fb5cfc664e2ef50cc8bc1	0	0	0	0	0	0	0	0	7	0	0	0	0	0	0	0	0	0	0	0	0	0	0	0	0	0	0	0	0	0	0	89	0	0	0	0	0
4978c36407b7b38239ac71f4edf5c8f5	0	0	0	0	0	0	0	0	0	0	0	0	0	0	0	0	0	0	0	0	0	0	0	0	0	0	0	0	0	0	0	0	0	0	0	0	96
191b4f0b9e2347e5a298fb8679ea88ca	0	0	0	0	0	0	0	0	96	0	0	0	0	0	0	0	0	0	0	0	0	0	0	0	0	0	0	0	0	0	0	0	0	0	0	0	0
c437a4d8445efe7e034383a451a205f1	0	0	0	0	0	0	0	0	0	0	0	0	0	0	0	0	0	0	0	0	0	0	0	0	0	0	0	0	0	55	0	40	0	0	0	0	0
872850f4abf12cb139afd686df118ebb	0	0	95	0	0	0	0	0	0	0	0	0	0	0	0	0	0	0	0	0	0	0	0	0	0	0	0	0	0	0	0	0	0	0	0	0	0
3a4892a6b53661d7bf28005423e029bf	0	0	0	0	0	0	0	7	0	0	0	0	0	0	9	0	0	0	0	0	0	0	0	0	0	0	0	0	0	0	0	0	0	0	0	0	79
1b9e78ec077411337499f063f13d5c28	11	13	0	0	0	0	0	0	0	0	0	0	0	0	0	0	0	0	0	0	0	0	0	0	0	0	0	65	0	0	0	6	0	0	0	0	0
fd124b25692d50ac0c38c46c07cdf2b7	21	0	0	0	0	0	0	0	0	73	0	0	0	0	0	0	0	0	0	0	0	0	0	0	0	0	0	0	0	0	0	0	0	0	0	0	0
f344d7b2d38e910b92b011beac691973	89	0	0	0	0	0	0	0	0	0	0	0	0	0	0	0	0	0	0	0	0	0	0	0	0	0	0	0	0	0	0	5	0	0	0	0	0
28ff9f3715332788c8b985118ee49001	0	0	0	0	0	0	0	0	0	0	0	0	0	0	0	0	0	0	0	0	0	0	0	0	0	94	0	0	0	0	0	0	0	0	0	0	0
ed12e0e06cf19f16513aa3863cb8fdc1	93	0	0	0	0	0	0	0	0	0	0	0	0	0	0	0	0	0	0	0	0	0	0	0	0	0	0	0	0	0	0	0	0	0	0	0	0
e2cc64dcf4b20b27194693421f6a0edc	0	0	0	0	0	0	0	0	0	93	0	0	0	0	0	0	0	0	0	0	0	0	0	0	0	0	0	0	0	0	0	0	0	0	0	0	0
cf7149eae5b54db7e01e6b56dbd93741	0	0	0	0	0	0	0	0	0	0	0	0	0	0	0	0	0	0	0	0	0	0	0	0	0	0	0	0	0	0	0	0	0	50	43	0	0
7716626c61ba9ac8b2e0e47cff83da35	0	0	0	0	0	0	0	0	93	0	0	0	0	0	0	0	0	0	0	0	0	0	0	0	0	0	0	0	0	0	0	0	0	0	0	0	0
690f1f2c40c5b8d8aa7c0d0c6e984c51	0	0	0	0	0	0	0	0	0	0	15	0	7	0	0	0	0	0	0	22	0	0	0	0	0	0	49	0	0	0	0	0	0	0	0	0	0
6002a1de5a8b77ff7f0c4f83400551cc	0	0	0	0	0	0	0	0	0	0	0	0	0	0	0	0	0	0	93	0	0	0	0	0	0	0	0	0	0	0	0	0	0	0	0	0	0
2cb5b23b2e33f7f1478527c3ce9fc818	0	0	0	0	32	0	0	26	0	0	0	0	0	0	20	0	0	0	0	0	0	0	0	0	0	0	15	0	0	0	0	0	0	0	0	0	0
d17f5af5be60807a037a735774ceb1e0	0	0	0	0	0	0	0	0	0	0	0	0	0	0	0	0	0	0	0	0	0	0	0	0	0	0	0	0	0	0	0	0	0	0	0	92	0
049edf570425cd7cbe7834f72894438a	0	0	0	0	0	0	0	0	0	0	0	0	0	0	0	0	0	0	0	0	0	0	0	0	59	0	0	0	0	33	0	0	0	0	0	0	0
fc6c6fa49dbb97925abfca981cc01616	0	0	0	0	0	0	0	0	0	0	32	0	0	0	0	59	0	0	0	0	0	0	0	0	0	0	0	0	0	0	0	0	0	0	0	0	0
f3eab60e5b6f86212b8dd55ab0f501bc	66	0	0	0	0	0	0	25	0	0	0	0	0	0	0	0	0	0	0	0	0	0	0	0	0	0	0	0	0	0	0	0	0	0	0	0	0
de3a65f854fb007358ab9eb3c471f477	0	0	0	0	81	0	0	2	0	0	0	0	0	0	0	0	8	0	0	0	0	0	0	0	0	0	0	0	0	0	0	0	0	0	0	0	0
d60bb8c222b37fda683d5a0705c49eca	0	0	0	0	0	0	0	0	0	0	0	0	0	0	0	0	0	91	0	0	0	0	0	0	0	0	0	0	0	0	0	0	0	0	0	0	0
27b8f256e414701b1953d2be3b5efef7	0	0	0	0	0	0	0	0	91	0	0	0	0	0	0	0	0	0	0	0	0	0	0	0	0	0	0	0	0	0	0	0	0	0	0	0	0
0dbc0c5a7e61831761f416a470d250e1	0	91	0	0	0	0	0	0	0	0	0	0	0	0	0	0	0	0	0	0	0	0	0	0	0	0	0	0	0	0	0	0	0	0	0	0	0
cd0d53e933c0f307e6ff125334ff79f0	0	0	59	0	0	0	0	0	0	0	0	0	0	0	0	31	0	0	0	0	0	0	0	0	0	0	0	0	0	0	0	0	0	0	0	0	0
c10c2bc49de9fe99ab50335003000643	0	0	0	0	0	0	0	0	90	0	0	0	0	0	0	0	0	0	0	0	0	0	0	0	0	0	0	0	0	0	0	0	0	0	0	0	0
6de388d9675fc6a2167d1366dd03bb81	0	0	0	0	0	0	0	0	0	0	0	0	0	0	0	0	0	0	0	0	0	0	16	0	0	0	0	6	0	13	55	0	0	0	0	0	0
d59058859711827af0c5d3f8f01db5a7	0	0	0	0	0	0	0	0	0	0	0	0	0	0	0	0	0	0	0	0	0	0	0	0	0	0	0	0	0	0	0	0	0	0	89	0	0
c65480c588fadb2ba182889abedb218a	0	0	0	0	0	0	0	21	0	0	0	0	0	0	68	0	0	0	0	0	0	0	0	0	0	0	0	0	0	0	0	0	0	0	0	0	0
a13562ae2b100657cc62dc0309f0174f	0	0	0	0	0	0	0	0	0	0	0	0	0	0	0	0	0	0	0	0	0	0	0	0	0	0	0	0	0	0	50	39	0	0	0	0	0
8516fd289cb5328d65dda91dd6e486c7	0	0	0	0	0	0	0	0	0	0	0	0	0	0	0	0	0	0	0	0	0	0	0	0	0	0	0	0	0	0	0	0	0	0	0	89	0
7bf1df6db7d5f6cdb2e18081099faed7	0	0	0	0	0	0	0	54	0	0	0	0	0	0	35	0	0	0	0	0	0	0	0	0	0	0	0	0	0	0	0	0	0	0	0	0	0
53162bb7acbad5cf2d6b02405a1c11bb	0	0	0	0	0	0	0	0	0	0	0	0	0	0	0	0	0	0	0	0	0	0	0	0	0	0	0	0	0	0	0	0	0	0	0	89	0
47086ca23f6d0571be0a5717d3f876e5	0	0	0	0	0	0	0	0	0	0	0	0	0	0	0	0	0	0	0	0	0	89	0	0	0	0	0	0	0	0	0	0	0	0	0	0	0
ee6b56a54473b0edac8e079bee825aaf	0	37	0	0	0	0	0	0	0	0	0	0	0	0	0	0	0	0	0	0	0	0	0	0	36	0	0	0	0	15	0	0	0	0	0	0	0
ebd63c71c78448649097081d6b4a326e	0	0	0	0	0	0	0	0	0	0	0	0	0	0	0	0	0	0	0	0	0	0	0	0	0	0	0	0	0	0	0	0	0	88	0	0	0
b4738d94e278a14f07786e0858b99927	0	0	0	0	0	0	0	0	0	0	0	0	0	0	0	0	0	0	0	0	0	0	0	0	0	0	0	0	0	45	0	0	0	43	0	0	0
ae0639a3fa10642a2e91a5700163ffaf	0	0	0	0	0	0	0	0	0	0	0	34	0	0	0	0	0	0	54	0	0	0	0	0	0	0	0	0	0	0	0	0	0	0	0	0	0
8b52c97f860c1069e29861ba0bc0aa0f	2	0	0	0	0	0	0	0	0	0	0	0	0	0	0	0	0	0	0	0	0	0	0	0	0	0	0	0	0	0	0	8	0	78	0	0	0
74c764cd57dcb0e8dc8945a1836bdc3a	0	0	0	0	0	0	0	0	0	0	0	0	10	0	75	0	0	0	0	0	0	0	0	0	0	0	0	0	0	0	0	0	0	0	3	0	0
2874b5b2ea4914159d40fc6bec862468	0	0	0	0	0	0	0	0	0	0	0	0	0	88	0	0	0	0	0	0	0	0	0	0	0	0	0	0	0	0	0	0	0	0	0	0	0
0e48df54fa2fadeac24728f293de7fd2	0	0	0	0	0	0	0	0	80	0	0	8	0	0	0	0	0	0	0	0	0	0	0	0	0	0	0	0	0	0	0	0	0	0	0	0	0
ba1ec526efddeab43475680ebe4ff658	0	0	0	0	0	0	0	55	0	0	0	0	0	0	0	32	0	0	0	0	0	0	0	0	0	0	0	0	0	0	0	0	0	0	0	0	0
aedc22f2b192f8a6699e8091c15e826f	0	0	0	0	0	0	0	0	0	0	0	0	0	0	0	0	0	0	0	0	0	0	0	0	0	0	0	0	0	0	0	87	0	0	0	0	0
753d27a131c095aa42c9e70e7debb2ae	0	0	0	0	0	0	0	0	0	0	0	0	0	0	0	0	0	0	0	0	0	0	0	0	0	0	0	0	0	0	0	0	56	0	0	31	0
6b11871f385bd9a1825529f8d412bdbd	0	0	0	0	0	0	0	0	0	0	0	0	0	0	0	0	0	0	0	0	0	0	0	0	0	0	0	0	37	0	50	0	0	0	0	0	0
634f20bace9596ebabb219628bc80f31	0	0	0	0	28	0	41	0	0	18	0	0	0	0	0	0	0	0	0	0	0	0	0	0	0	0	0	0	0	0	0	0	0	0	0	0	0
48cc5149ab2079189ba2b386a38af2c3	0	87	0	0	0	0	0	0	0	0	0	0	0	0	0	0	0	0	0	0	0	0	0	0	0	0	0	0	0	0	0	0	0	0	0	0	0
1c1313bfe415e49c123589b858138123	0	0	41	0	0	0	0	0	0	0	0	0	0	0	0	46	0	0	0	0	0	0	0	0	0	0	0	0	0	0	0	0	0	0	0	0	0
a95862b28c3ba5762b80536a939d2632	0	0	0	0	0	0	0	0	0	0	0	0	0	0	86	0	0	0	0	0	0	0	0	0	0	0	0	0	0	0	0	0	0	0	0	0	0
a0bb8fa41c3e2dfe58d9959a6a23c638	21	0	0	0	0	0	0	0	0	30	0	0	0	0	0	0	0	0	0	0	0	35	0	0	0	0	0	0	0	0	0	0	0	0	0	0	0
9d55652203d7e692e27971ca19756eb2	0	0	0	0	0	0	0	0	0	0	0	0	0	86	0	0	0	0	0	0	0	0	0	0	0	0	0	0	0	0	0	0	0	0	0	0	0
913885d166372217403d26cfaa94d347	0	0	0	0	0	0	0	0	0	0	86	0	0	0	0	0	0	0	0	0	0	0	0	0	0	0	0	0	0	0	0	0	0	0	0	0	0
2a235bb2938a36f4608e82cffea4f9fa	0	0	0	0	0	0	0	0	0	0	0	0	0	0	0	0	0	86	0	0	0	0	0	0	0	0	0	0	0	0	0	0	0	0	0	0	0
1ab3e638ab162bbe8b54bd74a3916885	0	86	0	0	0	0	0	0	0	0	0	0	0	0	0	0	0	0	0	0	0	0	0	0	0	0	0	0	0	0	0	0	0	0	0	0	0
d11ba36e48b8bf9b57c35da7003d745c	0	0	0	0	0	0	0	0	0	85	0	0	0	0	0	0	0	0	0	0	0	0	0	0	0	0	0	0	0	0	0	0	0	0	0	0	0
8a1e35e4b85c430060c63f11fee9ea14	0	0	0	0	85	0	0	0	0	0	0	0	0	0	0	0	0	0	0	0	0	0	0	0	0	0	0	0	0	0	0	0	0	0	0	0	0
c5abb086c2d4bc08601dd76ab09cfd26	0	0	0	0	0	0	0	0	0	0	0	0	0	0	0	0	0	0	0	0	0	0	0	0	84	0	0	0	0	0	0	0	0	0	0	0	0
8f1dad69e56db22cf689bf13b24f626a	0	0	0	0	0	0	0	0	0	0	0	0	0	0	0	0	0	0	0	0	0	0	0	0	0	0	0	0	0	84	0	0	0	0	0	0	0
706c11167a80d35dc6431dbe33fdd0eb	7	5	0	0	0	0	0	0	0	0	0	0	0	0	0	0	0	0	0	0	0	72	0	0	0	0	0	0	0	0	0	0	0	0	0	0	0
5d737429d1f421818623449f7b061472	0	0	0	0	0	0	0	0	0	0	0	0	0	0	0	0	0	0	0	0	0	0	0	0	0	0	0	0	0	0	84	0	0	0	0	0	0
48f9624e36350a9226a0aeab061d4b6f	0	0	0	0	0	0	0	0	0	84	0	0	0	0	0	0	0	0	0	0	0	0	0	0	0	0	0	0	0	0	0	0	0	0	0	0	0
33bb722b8f66b786ffe39e13e2eb6690	0	0	0	0	0	0	0	0	0	0	0	0	0	0	0	0	0	0	0	0	0	0	0	0	84	0	0	0	0	0	0	0	0	0	0	0	0
e3433a81bdd15c752856668ee0caa4f5	0	0	0	0	0	0	0	0	0	0	0	0	0	0	0	83	0	0	0	0	0	0	0	0	0	0	0	0	0	0	0	0	0	0	0	0	0
d69698b6acba408efb6739f06ebae3f3	0	16	0	0	0	0	0	0	0	0	0	0	0	0	0	0	0	0	0	0	0	0	0	0	23	0	0	0	0	31	0	13	0	0	0	0	0
bdc4471e686581fbc2084410a38941bc	0	0	0	0	0	0	0	0	0	0	0	0	0	0	0	0	0	0	0	0	0	0	0	0	0	83	0	0	0	0	0	0	0	0	0	0	0
b45ace7dcfd22c27638af1b8b7efcbea	0	0	0	0	0	0	0	0	0	0	0	0	0	0	0	0	0	0	0	0	0	0	0	0	0	0	0	0	0	0	83	0	0	0	0	0	0
acfe1dd29fc16fe15b20c0a589296303	0	0	0	0	83	0	0	0	0	0	0	0	0	0	0	0	0	0	0	0	0	0	0	0	0	0	0	0	0	0	0	0	0	0	0	0	0
a822e9cb7addf56689466c8099706442	76	0	7	0	0	0	0	0	0	0	0	0	0	0	0	0	0	0	0	0	0	0	0	0	0	0	0	0	0	0	0	0	0	0	0	0	0
a4a154a1f2cc83f7e833dffac4d8811a	0	0	0	0	0	0	0	0	0	0	0	0	0	0	0	0	0	0	0	0	0	0	0	0	0	0	0	0	0	0	0	0	0	0	83	0	0
5397795eb7a1e0bd842a97306893ac7b	0	0	0	0	0	0	0	0	0	0	0	0	0	83	0	0	0	0	0	0	0	0	0	0	0	0	0	0	0	0	0	0	0	0	0	0	0
4b7548695d52b2c59550d6f9306ba7a4	0	0	0	0	0	0	0	0	0	0	0	0	0	0	0	0	0	0	0	0	0	0	0	8	0	0	0	0	0	0	43	0	0	0	0	0	32
3f287f9532f34bf3c51aacd2003da229	83	0	0	0	0	0	0	0	0	0	0	0	0	0	0	0	0	0	0	0	0	0	0	0	0	0	0	0	0	0	0	0	0	0	0	0	0
363f6485e6e6986e9ebac7568d3bb84a	0	0	0	0	0	0	0	0	0	83	0	0	0	0	0	0	0	0	0	0	0	0	0	0	0	0	0	0	0	0	0	0	0	0	0	0	0
f9cb8ca88aa0a33152b20e0da2ad30b4	0	0	0	0	0	0	0	0	0	0	0	0	0	0	0	0	0	0	0	0	0	0	0	0	0	0	0	0	0	0	0	0	0	0	82	0	0
2ae3cdcf48afe2241abd63b737d5ac7c	15	0	0	0	0	0	0	0	24	0	16	0	0	0	0	0	0	0	0	0	0	0	0	0	0	0	0	7	0	9	0	0	0	0	11	0	0
11165fe4e60c489624f3263a1bca9939	0	0	0	0	0	0	0	9	0	0	0	0	0	0	0	0	4	0	0	0	0	0	0	0	0	0	0	0	0	0	0	0	0	27	42	0	0
f42ff49c4d1904df2ecf9d1fbc222df5	0	0	0	0	0	0	0	0	81	0	0	0	0	0	0	0	0	0	0	0	0	0	0	0	0	0	0	0	0	0	0	0	0	0	0	0	0
efe2052eda80a6bc395ee5f73408a8ba	27	0	0	0	0	0	0	0	0	0	0	0	0	32	0	0	0	0	0	0	0	0	0	0	0	0	0	0	0	0	0	0	0	0	0	22	0
da335c857db6d56010816a68752b9ada	0	0	0	0	0	0	0	0	0	0	0	0	0	0	0	0	0	0	0	0	0	0	0	0	81	0	0	0	0	0	0	0	0	0	0	0	0
a943e6f3191536eaf27a572b31020540	0	0	0	0	0	0	0	0	0	0	0	0	0	0	0	0	0	0	0	0	0	0	0	0	0	81	0	0	0	0	0	0	0	0	0	0	0
5f2dc07e23bd1de61c0129b381d6f046	0	0	0	0	0	0	0	0	0	81	0	0	0	0	0	0	0	0	0	0	0	0	0	0	0	0	0	0	0	0	0	0	0	0	0	0	0
11022ddbaa2a27b84e35ea1a868f16a2	0	0	0	0	0	0	0	0	0	0	0	0	0	0	0	0	0	0	0	0	0	0	0	0	0	0	0	0	0	0	0	0	81	0	0	0	0
003c13563525fb68e1a194bda3d1c76a	0	81	0	0	0	0	0	0	0	0	0	0	0	0	0	0	0	0	0	0	0	0	0	0	0	0	0	0	0	0	0	0	0	0	0	0	0
d837d7fbfcc95d4a1eea2f2c77cd65f2	0	0	0	0	0	0	0	0	0	0	0	0	0	0	0	0	0	0	0	0	0	0	0	0	80	0	0	0	0	0	0	0	0	0	0	0	0
d68c559f223d8ba995425040c804352c	0	31	0	0	0	0	0	49	0	0	0	0	0	0	0	0	0	0	0	0	0	0	0	0	0	0	0	0	0	0	0	0	0	0	0	0	0
b3354c401cdc6d9863b2d3c0f95a16bd	0	0	0	0	0	0	0	0	0	0	0	0	0	0	0	0	0	0	12	0	0	0	0	45	0	23	0	0	0	0	0	0	0	0	0	0	0
5d106a1f427d746eb329cddf1f92d09e	0	0	0	0	0	0	0	0	0	80	0	0	0	0	0	0	0	0	0	0	0	0	0	0	0	0	0	0	0	0	0	0	0	0	0	0	0
2a9face8f8f818dcd418abd85dacb7f5	0	0	0	80	0	0	0	0	0	0	0	0	0	0	0	0	0	0	0	0	0	0	0	0	0	0	0	0	0	0	0	0	0	0	0	0	0
9c540e4a3d4996b912b7f893df3bde6c	0	79	0	0	0	0	0	0	0	0	0	0	0	0	0	0	0	0	0	0	0	0	0	0	0	0	0	0	0	0	0	0	0	0	0	0	0
6face89d1d5c9658fa7ed17831370af4	0	0	0	14	0	0	0	0	0	27	0	0	0	0	0	0	0	0	0	9	0	0	0	0	0	13	0	0	0	0	0	0	16	0	0	0	0
55eabbe53d9c4075482632f9f3849a06	0	0	0	0	0	0	0	0	0	79	0	0	0	0	0	0	0	0	0	0	0	0	0	0	0	0	0	0	0	0	0	0	0	0	0	0	0
2c3baebf873daa247d35324ffc938d2c	0	79	0	0	0	0	0	0	0	0	0	0	0	0	0	0	0	0	0	0	0	0	0	0	0	0	0	0	0	0	0	0	0	0	0	0	0
f6b8c3a61073532d4df116ac6bd731df	0	0	0	0	0	0	0	0	0	74	0	0	0	0	0	0	0	0	0	0	0	0	0	0	0	0	0	0	0	0	0	0	0	0	0	4	0
e6f258747f9bf1b9a661fb64203a9a28	0	0	0	0	0	0	0	0	0	0	0	0	0	0	0	0	0	0	0	0	0	0	0	0	0	0	0	0	0	78	0	0	0	0	0	0	0
e0220c793b5e09ba9db6171734a6f9af	0	78	0	0	0	0	0	0	0	0	0	0	0	0	0	0	0	0	0	0	0	0	0	0	0	0	0	0	0	0	0	0	0	0	0	0	0
bb230ce333910c1c53962607b84f3a2a	0	0	0	0	0	0	0	0	0	0	0	0	0	0	0	0	0	0	0	0	0	0	0	0	0	0	0	0	0	0	78	0	0	0	0	0	0
b42573c1712315d1419ed5f3cf23d21e	0	0	0	0	0	0	0	0	0	0	0	0	0	0	0	0	0	0	78	0	0	0	0	0	0	0	0	0	0	0	0	0	0	0	0	0	0
7e3e57b6af05d98a674500792dd62d4c	0	0	0	0	0	0	0	0	0	0	0	0	0	0	0	0	0	0	0	0	0	0	0	28	0	50	0	0	0	0	0	0	0	0	0	0	0
380bda0ff724fc3bac16699b32f2da04	0	0	0	0	0	0	0	0	0	0	0	0	0	0	0	0	0	0	0	0	0	0	0	0	0	0	0	0	0	78	0	0	0	0	0	0	0
0b97060a67b34bc03ba43537ddbb1e28	78	0	0	0	0	0	0	0	0	0	0	0	0	0	0	0	0	0	0	0	0	0	0	0	0	0	0	0	0	0	0	0	0	0	0	0	0
eb728367ca1e90a6b805f73db7b71f66	77	0	0	0	0	0	0	0	0	0	0	0	0	0	0	0	0	0	0	0	0	0	0	0	0	0	0	0	0	0	0	0	0	0	0	0	0
94cc192d7f4055e5b4d608ebcbdcf7dd	0	0	0	0	77	0	0	0	0	0	0	0	0	0	0	0	0	0	0	0	0	0	0	0	0	0	0	0	0	0	0	0	0	0	0	0	0
7027456330570851b81d793be5e2d800	0	0	0	0	0	0	0	0	0	13	0	0	0	0	0	0	0	0	0	0	0	0	0	10	0	54	0	0	0	0	0	0	0	0	0	0	0
6b133ae2ad0bd0282f3c21e8cd4d6b67	0	0	0	0	0	0	0	0	0	0	0	0	0	0	0	0	0	0	0	0	0	77	0	0	0	0	0	0	0	0	0	0	0	0	0	0	0
249d599404f3076af0d567b1668f912c	0	0	0	0	0	0	0	0	0	0	0	0	0	0	0	0	0	77	0	0	0	0	0	0	0	0	0	0	0	0	0	0	0	0	0	0	0
21b04aaabca0f92a5ba0a0b2eaa31aea	13	7	0	0	37	0	0	0	0	3	0	2	0	8	0	0	0	0	0	0	0	0	0	0	0	3	0	0	0	4	0	0	0	0	0	0	0
21956d19cae54493e6c2ee32bdaa557a	39	0	0	0	0	0	0	38	0	0	0	0	0	0	0	0	0	0	0	0	0	0	0	0	0	0	0	0	0	0	0	0	0	0	0	0	0
07f12af144795fb85b5dff24566157a4	0	0	0	0	0	0	0	0	0	0	0	0	0	0	0	0	0	0	0	77	0	0	0	0	0	0	0	0	0	0	0	0	0	0	0	0	0
f6ce1c5c692f199ada24fbb72b5d0177	0	0	0	0	0	0	0	0	76	0	0	0	0	0	0	0	0	0	0	0	0	0	0	0	0	0	0	0	0	0	0	0	0	0	0	0	0
b055d667e1ad72dbfec4ceecc6a42a6b	0	0	0	0	0	0	0	0	0	0	0	0	0	0	0	0	9	0	0	0	0	0	0	0	0	0	0	21	0	0	0	0	0	33	13	0	0
72b6dd29a34fccc2215eeb50c579534a	0	76	0	0	0	0	0	0	0	0	0	0	0	0	0	0	0	0	0	0	0	0	0	0	0	0	0	0	0	0	0	0	0	0	0	0	0
684d6598834572ade758ddfc4e214297	0	19	0	0	0	0	0	0	0	0	0	0	0	0	0	0	0	0	0	0	0	0	0	0	20	0	0	20	0	0	0	0	0	17	0	0	0
571d15255076580a72bd341e99776945	0	0	71	0	0	0	0	0	0	0	0	0	0	0	0	0	0	0	0	5	0	0	0	0	0	0	0	0	0	0	0	0	0	0	0	0	0
152a6fd5645e3d032e02b46dbebfc3a8	0	0	0	0	0	0	0	0	0	0	0	0	0	0	0	76	0	0	0	0	0	0	0	0	0	0	0	0	0	0	0	0	0	0	0	0	0
0c3e13682ac503edac6bbf578aea4c4d	0	0	0	0	0	0	0	0	0	0	0	0	0	0	0	0	0	0	0	0	0	0	0	0	0	0	0	76	0	0	0	0	0	0	0	0	0
005bef08ff46262cb2ba9a24f9cf3ee2	0	76	0	0	0	0	0	0	0	0	0	0	0	0	0	0	0	0	0	0	0	0	0	0	0	0	0	0	0	0	0	0	0	0	0	0	0
dab3873d3f77e3e04b39e96cd922c6f8	0	0	0	0	0	0	0	0	0	23	0	0	0	0	0	0	0	0	0	0	0	0	0	34	0	18	0	0	0	0	0	0	0	0	0	0	0
b4682a1a0d3a159661a3753e688b00c8	0	0	0	0	0	0	0	0	0	0	0	0	0	0	75	0	0	0	0	0	0	0	0	0	0	0	0	0	0	0	0	0	0	0	0	0	0
aa279c1008b2c378d3bc0ed92f90da65	0	0	0	0	0	0	0	52	6	0	0	0	0	0	5	0	0	0	0	0	0	0	0	6	0	0	0	0	0	0	0	0	0	0	0	6	0
8b67fe41625c37740c7264e85412c621	0	0	0	0	0	0	0	0	0	0	0	0	0	0	0	0	0	0	0	0	0	0	0	15	0	60	0	0	0	0	0	0	0	0	0	0	0
72522cd5592463ff5e3bb519d723c591	75	0	0	0	0	0	0	0	0	0	0	0	0	0	0	0	0	0	0	0	0	0	0	0	0	0	0	0	0	0	0	0	0	0	0	0	0
3003db2bffd4c39a23c102cd76f6e788	0	0	20	0	0	0	55	0	0	0	0	0	0	0	0	0	0	0	0	0	0	0	0	0	0	0	0	0	0	0	0	0	0	0	0	0	0
139088cf51ac97f770f3614c727e1ed3	0	75	0	0	0	0	0	0	0	0	0	0	0	0	0	0	0	0	0	0	0	0	0	0	0	0	0	0	0	0	0	0	0	0	0	0	0
d60ff328eda2b697cf164ff168960d7e	0	0	0	0	0	0	0	0	0	56	0	0	0	0	0	0	0	0	0	0	0	18	0	0	0	0	0	0	0	0	0	0	0	0	0	0	0
c635b25bcab0264e548c4c73cc40d0fd	0	74	0	0	0	0	0	0	0	0	0	0	0	0	0	0	0	0	0	0	0	0	0	0	0	0	0	0	0	0	0	0	0	0	0	0	0
b206923814ad05b592723ede31a11cc0	0	74	0	0	0	0	0	0	0	0	0	0	0	0	0	0	0	0	0	0	0	0	0	0	0	0	0	0	0	0	0	0	0	0	0	0	0
ac218806afdfcaad76223efbc61e670c	52	0	0	0	0	0	0	22	0	0	0	0	0	0	0	0	0	0	0	0	0	0	0	0	0	0	0	0	0	0	0	0	0	0	0	0	0
a87f3da2571c3ae61210adb2ba01bdfa	0	74	0	0	0	0	0	0	0	0	0	0	0	0	0	0	0	0	0	0	0	0	0	0	0	0	0	0	0	0	0	0	0	0	0	0	0
885a479bbf906d98874890ab5f50b271	0	0	0	0	0	0	0	0	0	0	0	0	0	0	0	0	0	0	0	0	0	74	0	0	0	0	0	0	0	0	0	0	0	0	0	0	0
4effeb6bea61fb28d16c7479113d8563	0	74	0	0	0	0	0	0	0	0	0	0	0	0	0	0	0	0	0	0	0	0	0	0	0	0	0	0	0	0	0	0	0	0	0	0	0
0f7fcbfc27004fa3f44b6473eb4da760	0	71	0	0	0	0	0	0	0	0	0	0	0	0	0	0	0	0	0	0	0	0	0	0	0	0	0	0	0	3	0	0	0	0	0	0	0
eca5e510028268adff978bc943533776	0	0	0	0	0	0	0	0	0	0	0	0	0	0	0	0	0	0	0	0	0	0	0	0	0	0	0	0	0	0	0	0	0	0	0	0	73
ea939f6700513c38a5e518f78d61ede9	0	0	0	0	0	0	0	37	0	0	0	0	0	0	36	0	0	0	0	0	0	0	0	0	0	0	0	0	0	0	0	0	0	0	0	0	0
df83a038f3ccfb03085c59cfe92e24b4	0	0	0	2	0	0	0	0	14	3	0	0	0	0	2	0	0	5	0	0	0	0	0	13	0	5	0	3	0	0	15	0	4	0	0	7	0
bd152faaaaf8b0600bd2829e8be57e89	0	0	0	0	0	0	0	0	0	0	0	0	0	73	0	0	0	0	0	0	0	0	0	0	0	0	0	0	0	0	0	0	0	0	0	0	0
9713030c899373a685bdb3b7b1c82774	0	0	0	0	0	0	0	0	0	0	0	0	0	0	0	0	0	0	0	0	0	0	0	0	73	0	0	0	0	0	0	0	0	0	0	0	0
8c95949260a4ebc5950043882e6fb3a5	58	15	0	0	0	0	0	0	0	0	0	0	0	0	0	0	0	0	0	0	0	0	0	0	0	0	0	0	0	0	0	0	0	0	0	0	0
62854eaafe5a52702576cb970586eb5f	0	0	0	0	0	0	0	0	0	73	0	0	0	0	0	0	0	0	0	0	0	0	0	0	0	0	0	0	0	0	0	0	0	0	0	0	0
5a1031a24764e0f2d87aa044b7bc9dce	0	0	0	0	0	0	49	0	0	0	0	0	0	0	0	0	0	0	0	0	0	0	0	24	0	0	0	0	0	0	0	0	0	0	0	0	0
d9c0aa25dac1d9b85b4a72e6243001d7	0	0	0	0	0	0	0	0	0	0	0	0	0	0	0	0	72	0	0	0	0	0	0	0	0	0	0	0	0	0	0	0	0	0	0	0	0
d6c5fc5b365023c7a7aa28664ef0d2f4	72	0	0	0	0	0	0	0	0	0	0	0	0	0	0	0	0	0	0	0	0	0	0	0	0	0	0	0	0	0	0	0	0	0	0	0	0
993ddf1304140c9803531a1433438b3d	0	0	0	0	0	0	0	72	0	0	0	0	0	0	0	0	0	0	0	0	0	0	0	0	0	0	0	0	0	0	0	0	0	0	0	0	0
76a8a23017150e57407d41b59eccb987	0	0	0	0	0	0	0	0	0	72	0	0	0	0	0	0	0	0	0	0	0	0	0	0	0	0	0	0	0	0	0	0	0	0	0	0	0
3d6f87d50386306ee768abe4f669b738	0	0	0	0	0	0	0	0	0	0	0	0	0	0	72	0	0	0	0	0	0	0	0	0	0	0	0	0	0	0	0	0	0	0	0	0	0
3181f046197f40f4b6fd0db5a183c7fa	0	0	0	0	0	0	0	0	0	0	0	0	0	0	0	0	0	9	0	0	0	63	0	0	0	0	0	0	0	0	0	0	0	0	0	0	0
bc7b3b45e0754df1f808d960bb9c46ed	0	0	0	0	0	0	0	0	0	71	0	0	0	0	0	0	0	0	0	0	0	0	0	0	0	0	0	0	0	0	0	0	0	0	0	0	0
bc019f05daf1054fc3b1a4c8c31857d7	0	0	0	0	0	0	0	0	0	0	0	0	0	0	0	0	0	0	0	0	0	0	0	0	0	0	0	0	0	28	0	43	0	0	0	0	0
956d7297f0463310fbdcef46f0e6b37b	0	0	0	0	0	0	0	0	71	0	0	0	0	0	0	0	0	0	0	0	0	0	0	0	0	0	0	0	0	0	0	0	0	0	0	0	0
4dd11d70380e5438e639301be89e9ad2	0	71	0	0	0	0	0	0	0	0	0	0	0	0	0	0	0	0	0	0	0	0	0	0	0	0	0	0	0	0	0	0	0	0	0	0	0
4c2bc0b03e28ba2feb6178f926eb7f5c	0	0	0	0	0	0	0	0	0	0	0	0	0	0	0	0	0	0	0	0	0	0	0	0	0	0	0	0	0	0	0	0	0	0	0	0	71
171e0bac1c69a9d86f03f7258d61407b	0	0	68	0	3	0	0	0	0	0	0	0	0	0	0	0	0	0	0	0	0	0	0	0	0	0	0	0	0	0	0	0	0	0	0	0	0
0f2905c5c3b681a088a4b6214226702b	0	0	0	0	0	0	0	0	0	53	18	0	0	0	0	0	0	0	0	0	0	0	0	0	0	0	0	0	0	0	0	0	0	0	0	0	0
fc82fb26aebeaf99fd0d57679acfa8d2	0	5	0	0	0	0	0	3	0	0	0	0	0	0	0	0	2	0	0	0	0	0	0	0	0	0	0	0	0	0	0	0	0	32	28	0	0
fc2797577fcb61396a661ef17a6b85f7	0	0	0	0	0	0	0	0	0	0	0	0	0	70	0	0	0	0	0	0	0	0	0	0	0	0	0	0	0	0	0	0	0	0	0	0	0
dd461c5c9c6956130fcc4ecabb29e2e7	21	0	26	0	0	0	0	0	0	0	0	0	0	0	0	0	0	23	0	0	0	0	0	0	0	0	0	0	0	0	0	0	0	0	0	0	0
d4c64d4afda135226d9c08a4d3c790ff	0	3	0	0	0	0	0	0	0	0	0	0	0	0	0	0	0	0	0	0	0	0	0	0	6	0	0	0	0	0	0	61	0	0	0	0	0
d287f2c588173fcfdeec843961e32bfb	0	0	0	0	0	0	0	39	0	0	0	0	0	11	5	0	0	15	0	0	0	0	0	0	0	0	0	0	0	0	0	0	0	0	0	0	0
c38f9b2eaaf6efe29248844e4c6b22ff	0	0	0	0	0	0	0	0	0	70	0	0	0	0	0	0	0	0	0	0	0	0	0	0	0	0	0	0	0	0	0	0	0	0	0	0	0
c212574829e9dc7e11121eab2aa094ad	0	0	0	0	0	0	0	0	0	0	0	0	0	0	0	0	0	0	0	0	0	0	0	0	0	0	0	0	0	0	0	0	0	0	0	0	70
bbe55c8cee9bdc9ddb80b2084fd370d3	0	0	0	0	70	0	0	0	0	0	0	0	0	0	0	0	0	0	0	0	0	0	0	0	0	0	0	0	0	0	0	0	0	0	0	0	0
9eeacfe706f7032c6baf6776a808238f	0	0	0	0	0	0	0	0	0	0	0	0	0	0	0	0	0	0	0	0	0	0	0	0	0	0	0	0	0	0	70	0	0	0	0	0	0
931b324a4ebaf2bca8f89716e97226d2	0	0	0	0	70	0	0	0	0	0	0	0	0	0	0	0	0	0	0	0	0	0	0	0	0	0	0	0	0	0	0	0	0	0	0	0	0
76de1c3009169b31fee0630da52b5a8a	0	0	0	5	0	0	0	0	19	0	0	0	0	0	0	5	0	6	0	10	0	25	0	0	0	0	0	0	0	0	0	0	0	0	0	0	0
50f1c0aa243270c6002a84d00ec2c381	33	0	0	0	0	0	37	0	0	0	0	0	0	0	0	0	0	0	0	0	0	0	0	0	0	0	0	0	0	0	0	0	0	0	0	0	0
1ab28044da6c3fe41817d321adf25c29	0	0	0	0	0	0	0	0	0	0	0	0	0	0	0	0	0	0	0	0	0	0	0	0	70	0	0	0	0	0	0	0	0	0	0	0	0
1a489d063bf4eb6bc3efccaec591e6f0	0	0	0	0	0	0	0	0	0	0	0	0	0	0	0	0	0	60	0	0	0	0	0	0	0	0	0	0	0	0	0	0	10	0	0	0	0
06d839a9f0bcb282a686fd0b7b107c25	0	0	0	0	0	0	0	0	0	0	0	0	0	0	70	0	0	0	0	0	0	0	0	0	0	0	0	0	0	0	0	0	0	0	0	0	0
edc1eb500423aec893217a0b58102973	0	0	0	0	0	0	0	0	69	0	0	0	0	0	0	0	0	0	0	0	0	0	0	0	0	0	0	0	0	0	0	0	0	0	0	0	0
bad5add2921786f66b780b58a2c00395	0	0	0	0	0	0	0	0	0	0	0	0	0	0	69	0	0	0	0	0	0	0	0	0	0	0	0	0	0	0	0	0	0	0	0	0	0
a65e86c68a8808b4f03a052be6154bcc	0	59	0	0	0	0	0	0	0	0	0	0	0	0	0	0	0	0	0	0	0	0	0	0	4	0	0	0	0	0	0	6	0	0	0	0	0
9afd613899ee096d6577b1a639c5f9cf	0	0	3	0	0	0	0	0	0	0	0	0	0	0	0	0	0	0	0	0	0	0	0	0	0	0	0	0	0	0	0	0	0	0	0	0	66
8994535563b497f84ad691c494da4369	0	0	0	0	0	0	0	0	0	0	0	0	0	0	0	0	0	0	0	0	0	0	0	0	0	0	0	0	0	0	0	0	0	0	0	0	69
6715f144f42437cce5fa13abe2a12a7a	0	8	0	0	0	0	0	0	0	0	37	0	0	0	0	13	0	0	0	11	0	0	0	0	0	0	0	0	0	0	0	0	0	0	0	0	0
5e34772e9cfa194e42dc9401dce212be	0	0	0	0	0	0	0	69	0	0	0	0	0	0	0	0	0	0	0	0	0	0	0	0	0	0	0	0	0	0	0	0	0	0	0	0	0
33db7b189dcfe16b551c393c56f3b5d5	0	0	0	0	0	0	0	0	0	0	0	0	0	0	0	11	0	0	0	0	0	0	0	0	0	0	0	12	0	0	0	0	0	44	2	0	0
1213a0b48ab3134f9c8c88e1bda66963	0	0	0	0	0	0	0	0	0	0	0	0	0	0	69	0	0	0	0	0	0	0	0	0	0	0	0	0	0	0	0	0	0	0	0	0	0
f17f6dfc595b042c4cab6951c986e0ff	0	0	0	0	0	0	0	0	46	0	0	0	0	0	0	0	0	0	0	0	0	0	0	0	22	0	0	0	0	0	0	0	0	0	0	0	0
f06a6ee6f0a81ca09be912f5f6d95738	0	0	0	0	0	0	0	0	0	0	0	0	0	0	0	0	0	0	0	0	0	0	0	0	0	0	0	0	0	0	0	0	0	0	0	68	0
c1565f23a1b26002039f8bc41f388141	0	0	0	68	0	0	0	0	0	0	0	0	0	0	0	0	0	0	0	0	0	0	0	0	0	0	0	0	0	0	0	0	0	0	0	0	0
ad5b6bd799a071dd8f226c3c3a2b1c89	0	13	0	0	0	0	0	0	0	0	0	0	0	0	0	0	0	0	0	0	0	0	0	0	55	0	0	0	0	0	0	0	0	0	0	0	0
45a387ee087412d13a9c356c751a7772	0	0	0	65	0	0	0	0	0	0	0	0	0	0	0	0	0	0	0	0	0	0	3	0	0	0	0	0	0	0	0	0	0	0	0	0	0
412db5850028fd435459f6e8c00cd7a9	52	0	0	0	0	0	0	0	0	16	0	0	0	0	0	0	0	0	0	0	0	0	0	0	0	0	0	0	0	0	0	0	0	0	0	0	0
22f8efd2b123f23669fad667cfee6ab4	0	0	0	0	0	0	0	0	0	0	0	0	0	66	0	0	0	0	0	0	2	0	0	0	0	0	0	0	0	0	0	0	0	0	0	0	0
0685cd21c72154a62b4676f5f7ff015d	0	37	0	0	0	0	0	0	0	0	0	0	0	0	0	0	0	0	0	0	0	0	0	0	16	0	0	0	0	15	0	0	0	0	0	0	0
debc33e7811554cfb6fb6cf98c8c1ecd	0	0	0	0	0	0	0	0	0	15	0	0	0	0	0	0	0	0	0	0	0	0	0	0	0	0	0	18	0	0	0	0	0	0	34	0	0
bde7e17e3540445b30c927fb83882cc1	67	0	0	0	0	0	0	0	0	0	0	0	0	0	0	0	0	0	0	0	0	0	0	0	0	0	0	0	0	0	0	0	0	0	0	0	0
9c5fa634f3f9d3e265d7bdda256d3bde	0	0	0	0	0	0	0	0	0	0	0	0	0	0	0	0	0	0	0	0	0	0	0	0	67	0	0	0	0	0	0	0	0	0	0	0	0
987358cde7549f0be7bced3e9f7bd164	0	0	0	0	0	0	0	0	0	0	0	0	0	0	0	0	0	15	0	0	0	0	0	0	0	0	0	16	0	3	2	27	0	4	0	0	0
930f64c32d0262e13724b8203be2e0e4	67	0	0	0	0	0	0	0	0	0	0	0	0	0	0	0	0	0	0	0	0	0	0	0	0	0	0	0	0	0	0	0	0	0	0	0	0
6f926ba8b5b78b53ff9174f0c1584bfd	0	0	0	67	0	0	0	0	0	0	0	0	0	0	0	0	0	0	0	0	0	0	0	0	0	0	0	0	0	0	0	0	0	0	0	0	0
538f38b854a901335d4a9194175a45d1	0	0	0	0	0	0	0	0	0	67	0	0	0	0	0	0	0	0	0	0	0	0	0	0	0	0	0	0	0	0	0	0	0	0	0	0	0
4e91e9647bc982a41bd1f54a4a7172c5	0	0	62	0	5	0	0	0	0	0	0	0	0	0	0	0	0	0	0	0	0	0	0	0	0	0	0	0	0	0	0	0	0	0	0	0	0
1498873b4577b43102ded0678a341247	0	0	0	4	0	3	7	6	0	0	2	3	4	0	0	0	3	3	0	0	0	8	0	0	4	0	0	0	3	0	0	8	0	0	3	0	6
a9bd64f0d1ae9d836bc75f9e6c950bcc	0	0	0	0	0	0	0	0	0	0	0	0	0	0	0	0	0	0	0	0	0	0	0	0	0	0	0	0	0	0	0	0	0	0	66	0	0
96d576bb99603c493ed2e289e74c743a	0	0	0	0	0	0	0	35	0	0	26	0	0	0	0	5	0	0	0	0	0	0	0	0	0	0	0	0	0	0	0	0	0	0	0	0	0
8a4ab4634d1782bff27595f7c82824fa	0	0	0	0	0	0	0	50	0	0	0	0	0	0	0	0	2	0	0	0	0	0	0	0	0	0	0	0	0	0	0	14	0	0	0	0	0
46ebd4decf1f220f0b034dd4b139b24e	0	0	0	0	0	0	0	0	0	0	0	0	0	0	0	0	66	0	0	0	0	0	0	0	0	0	0	0	0	0	0	0	0	0	0	0	0
3e40ebe2adf2b35aaa7b2bf5c67dcdab	0	0	0	0	0	0	0	0	0	0	66	0	0	0	0	0	0	0	0	0	0	0	0	0	0	0	0	0	0	0	0	0	0	0	0	0	0
2c2c7219440b2ec2a06d9dc8c22d4e1e	0	0	0	0	0	0	0	0	0	0	0	0	0	0	0	0	0	0	0	0	0	0	0	0	0	0	0	0	0	0	0	34	0	32	0	0	0
1f3078e826201f06e4ea702df6102250	66	0	0	0	0	0	0	0	0	0	0	0	0	0	0	0	0	0	0	0	0	0	0	0	0	0	0	0	0	0	0	0	0	0	0	0	0
00ea5b1ebd4edfd292b9ab1e22636e64	0	0	0	0	0	0	0	0	0	0	0	0	0	29	0	37	0	0	0	0	0	0	0	0	0	0	0	0	0	0	0	0	0	0	0	0	0
c68e3dad9f4a492081f2f7053edab736	0	7	0	0	0	0	0	0	0	0	0	0	0	0	0	0	0	0	0	0	0	0	0	0	13	0	0	0	0	22	0	23	0	0	0	0	0
bfadcb0106e96dfa25122fd99ec5c0c3	0	0	0	0	3	0	0	0	0	60	0	0	0	0	0	0	0	0	0	2	0	0	0	0	0	0	0	0	0	0	0	0	0	0	0	0	0
b705fee044b02d788b0488b30ee00b8d	0	0	0	0	0	0	0	0	0	65	0	0	0	0	0	0	0	0	0	0	0	0	0	0	0	0	0	0	0	0	0	0	0	0	0	0	0
acbdf8c999b693af338599dca201b6eb	0	0	0	0	0	0	0	0	0	0	0	0	0	0	0	0	0	0	0	0	0	0	0	0	0	0	0	46	0	0	0	0	0	0	0	0	19
94b2c78846522c089089851c001b38aa	0	27	0	0	0	0	0	0	0	0	0	0	0	0	0	0	0	0	0	0	0	0	0	0	38	0	0	0	0	0	0	0	0	0	0	0	0
5b5dea09b0cbc598f9e62751fdd3900e	0	0	0	0	0	0	0	0	0	65	0	0	0	0	0	0	0	0	0	0	0	0	0	0	0	0	0	0	0	0	0	0	0	0	0	0	0
0e5bf77a5edec72d30a2eb8da3777023	0	0	0	0	0	0	0	0	0	0	0	0	0	0	0	0	0	0	0	0	0	0	0	0	0	0	0	65	0	0	0	0	0	0	0	0	0
f68eda4b5eb2657bd7c3cf298eed89e6	0	0	0	0	0	0	0	0	0	0	0	0	0	0	0	0	0	0	0	0	0	0	0	0	0	0	0	0	0	0	0	0	0	0	0	64	0
f2e42ccc4cc7ee6acfa8e7121e456c63	0	0	0	0	0	0	0	0	0	0	0	0	0	34	0	0	0	0	0	0	0	0	0	0	0	0	0	5	0	0	0	0	25	0	0	0	0
eb254f006a34d1ea0e5641906aa59747	0	0	0	0	0	0	0	20	0	0	0	0	0	22	0	0	0	0	0	0	0	0	0	0	6	0	16	0	0	0	0	0	0	0	0	0	0
e7887d4db90d2cfe4b101b5e9ee5cf8d	0	0	0	0	0	0	0	0	0	0	0	0	0	0	0	0	0	0	64	0	0	0	0	0	0	0	0	0	0	0	0	0	0	0	0	0	0
c437f723aa02b617bae95d9fa889e033	0	0	0	0	0	0	0	0	0	0	0	0	0	0	0	0	0	0	0	0	0	0	0	0	0	0	0	0	0	0	0	64	0	0	0	0	0
9c93960c2beee60415194d2436de827f	0	0	0	0	0	0	0	0	0	0	0	0	0	0	0	64	0	0	0	0	0	0	0	0	0	0	0	0	0	0	0	0	0	0	0	0	0
8919f26197ae3f0f3756a2dd44ab2cb8	0	0	0	0	0	0	0	0	0	24	0	0	0	0	0	0	0	0	0	0	0	0	0	10	0	12	0	0	0	0	0	0	0	0	0	0	18
305570165ffec3279825d82aac88d0b7	0	0	0	0	0	0	34	0	0	0	0	0	0	0	0	0	0	0	0	0	0	0	0	0	0	0	0	0	0	0	0	0	0	0	0	0	30
0625151ef478e4c56f259aa7087fcd69	0	64	0	0	0	0	0	0	0	0	0	0	0	0	0	0	0	0	0	0	0	0	0	0	0	0	0	0	0	0	0	0	0	0	0	0	0
fb9ff2bff069ca9558fd568a2a51f73e	0	0	0	0	0	0	0	0	0	0	0	0	0	0	0	0	0	0	0	0	63	0	0	0	0	0	0	0	0	0	0	0	0	0	0	0	0
f3203f8e698dd2fa7057b71f340e1c62	0	0	0	0	0	0	0	0	0	0	0	0	0	0	0	0	0	0	0	0	0	0	0	0	63	0	0	0	0	0	0	0	0	0	0	0	0
c1363459ac77fc17918ee23e4e8a603e	0	63	0	0	0	0	0	0	0	0	0	0	0	0	0	0	0	0	0	0	0	0	0	0	0	0	0	0	0	0	0	0	0	0	0	0	0
869675698e2ef72e0cf86b9a6bbb28bd	0	0	0	0	0	0	0	0	0	0	0	0	0	0	0	0	0	0	0	0	0	0	0	0	0	0	0	0	0	0	63	0	0	0	0	0	0
84d0aa7b2a1887be9bdbf29ca03512c1	0	0	0	0	0	0	0	0	0	0	63	0	0	0	0	0	0	0	0	0	0	0	0	0	0	0	0	0	0	0	0	0	0	0	0	0	0
73f8a6744c072ecdf7c7d6b3f42f3447	0	19	0	0	0	0	0	0	0	0	0	0	0	0	0	0	0	0	7	0	0	0	0	0	30	0	0	0	0	0	0	7	0	0	0	0	0
6859fb0037d9dff7bbd9652fe91554a8	0	0	0	0	4	0	0	18	3	0	0	0	0	0	0	0	0	38	0	0	0	0	0	0	0	0	0	0	0	0	0	0	0	0	0	0	0
1e15fe140a7971aa93c86d8c32f6637a	0	0	0	0	0	0	0	63	0	0	0	0	0	0	0	0	0	0	0	0	0	0	0	0	0	0	0	0	0	0	0	0	0	0	0	0	0
19491b9210c11b4f3b8bda8638e8f326	0	0	0	9	0	0	0	0	0	0	0	0	0	0	0	0	5	0	0	0	0	3	0	0	0	0	0	0	0	4	32	10	0	0	0	0	0
16c0281dd1a4bd34923be70a16298d96	0	0	0	0	0	0	0	0	0	0	0	0	0	11	0	0	0	0	0	0	0	0	0	0	0	0	0	0	0	0	27	0	0	0	0	25	0
f6f1ea8e2607393613fff257d7d0be85	0	0	0	62	0	0	0	0	0	0	0	0	0	0	0	0	0	0	0	0	0	0	0	0	0	0	0	0	0	0	0	0	0	0	0	0	0
c990c139e04c72c1e435d2c0df239f8c	0	0	0	0	0	0	0	0	0	0	62	0	0	0	0	0	0	0	0	0	0	0	0	0	0	0	0	0	0	0	0	0	0	0	0	0	0
c1998738ba3fb9ba692823350a84c788	62	0	0	0	0	0	0	0	0	0	0	0	0	0	0	0	0	0	0	0	0	0	0	0	0	0	0	0	0	0	0	0	0	0	0	0	0
bb256aeb12c184faeeec34745e89b5fb	0	0	0	0	0	0	0	0	0	62	0	0	0	0	0	0	0	0	0	0	0	0	0	0	0	0	0	0	0	0	0	0	0	0	0	0	0
acd65e69c5da54fee89f5221485bffc8	0	62	0	0	0	0	0	0	0	0	0	0	0	0	0	0	0	0	0	0	0	0	0	0	0	0	0	0	0	0	0	0	0	0	0	0	0
a1d50fca45c4f311fbaf7746f11f4a47	0	5	0	0	0	0	0	0	0	0	0	0	0	0	0	0	0	0	0	0	0	0	0	0	20	0	0	0	0	0	0	37	0	0	0	0	0
82a7b8eabd9e24a73008abf9d982803f	0	62	0	0	0	0	0	0	0	0	0	0	0	0	0	0	0	0	0	0	0	0	0	0	0	0	0	0	0	0	0	0	0	0	0	0	0
80704a381b99bc7b4384eb0430563690	0	0	0	0	0	0	0	0	0	0	0	0	0	0	5	0	0	0	0	0	0	0	0	0	0	0	0	0	0	0	0	0	0	0	0	57	0
683ef1e482f900678265f3b9807727fe	0	0	0	0	62	0	0	0	0	0	0	0	0	0	0	0	0	0	0	0	0	0	0	0	0	0	0	0	0	0	0	0	0	0	0	0	0
5b9afb3bfb56e7666ff8bac2d81cf48d	0	0	0	0	0	0	0	0	0	0	0	0	0	0	0	0	0	0	0	0	0	0	0	25	16	0	0	21	0	0	0	0	0	0	0	0	0
46607f7aede9c897a3237799bc8939a5	0	0	0	0	0	0	0	0	0	0	0	0	0	0	0	0	0	0	0	0	0	0	0	0	0	0	0	0	0	0	0	20	0	0	42	0	0
2986eca8c15586a6d53f0a7b7a097e5c	0	0	0	0	0	0	0	0	0	0	0	0	0	2	0	0	0	0	0	0	0	0	0	0	45	0	0	0	0	3	0	12	0	0	0	0	0
f1d0954eead011d7eac58760f4beba7c	0	0	0	0	0	0	5	10	3	0	0	0	0	0	12	0	0	0	0	0	0	0	0	6	0	0	24	0	0	0	0	0	0	0	0	0	0
d3560243dfcde69ad2e75e4412240178	0	36	0	0	0	0	0	0	0	0	0	0	0	0	0	0	0	0	0	0	0	0	0	0	0	0	0	0	0	0	0	0	0	0	24	0	0
9ccc65bd5cfa818129e61fab223aebff	0	0	0	0	0	0	0	0	0	60	0	0	0	0	0	0	0	0	0	0	0	0	0	0	0	0	0	0	0	0	0	0	0	0	0	0	0
8855476f88a4d42b3950d5f5caeadf34	0	0	0	0	0	0	0	0	0	0	0	0	0	0	0	0	0	0	0	0	0	0	0	0	0	0	0	60	0	0	0	0	0	0	0	0	0
83f3b8d62efe77f0af80990633399f27	0	0	0	0	0	0	0	0	0	0	0	0	0	0	0	0	0	0	0	0	0	0	0	0	60	0	0	0	0	0	0	0	0	0	0	0	0
662df7347972855a7b714dc7e6d0ba8e	5	0	0	0	0	0	55	0	0	0	0	0	0	0	0	0	0	0	0	0	0	0	0	0	0	0	0	0	0	0	0	0	0	0	0	0	0
4767e4e4c736002ef8fb21b7048f121e	0	0	0	0	0	0	0	0	0	0	0	0	0	0	0	0	0	0	0	0	0	0	0	0	60	0	0	0	0	0	0	0	0	0	0	0	0
21f9c6b9e703c470266461226bbc93e4	0	0	0	0	0	0	0	0	0	0	0	0	0	9	0	0	0	0	0	32	0	0	0	0	0	0	0	19	0	0	0	0	0	0	0	0	0
13523dc0d56b2862df58494e96a85936	0	14	0	0	0	0	0	0	0	0	0	0	0	37	0	0	0	0	0	0	0	0	0	9	0	0	0	0	0	0	0	0	0	0	0	0	0
e1aa24b6ed818fc825a6b41ce399ee0f	39	20	0	0	0	0	0	0	0	0	0	0	0	0	0	0	0	0	0	0	0	0	0	0	0	0	0	0	0	0	0	0	0	0	0	0	0
9f009d244cac331e17e06e4a9aec4119	0	0	0	0	0	0	0	0	0	0	0	0	0	0	0	0	0	0	0	0	0	0	0	0	0	0	0	0	0	0	0	0	0	0	59	0	0
88d11e7a600ff3a3663ab3fe48e5f863	0	8	0	0	0	0	0	0	0	0	0	0	0	0	0	0	0	0	0	0	0	0	0	0	51	0	0	0	0	0	0	0	0	0	0	0	0
85e2a7f4fdeecc6a15d7d94fc776f5f6	0	0	0	0	54	0	0	0	0	0	0	5	0	0	0	0	0	0	0	0	0	0	0	0	0	0	0	0	0	0	0	0	0	0	0	0	0
82a3bcfe57b08e37221092b6562c2a8b	0	4	0	0	0	0	0	0	0	0	0	14	0	0	0	41	0	0	0	0	0	0	0	0	0	0	0	0	0	0	0	0	0	0	0	0	0
590c4d46cd5544bfd76440e8e2ce28ef	0	0	0	0	0	0	0	4	0	0	0	0	0	0	0	0	0	0	0	0	0	0	0	0	0	0	0	0	0	0	0	0	0	0	0	0	55
57ea5cc108233e42e08cf1036765bad4	0	59	0	0	0	0	0	0	0	0	0	0	0	0	0	0	0	0	0	0	0	0	0	0	0	0	0	0	0	0	0	0	0	0	0	0	0
4a2a1bdcdf24c8925e5977403e7df1cb	0	0	0	0	0	0	0	0	0	0	0	0	0	0	0	0	0	0	0	0	0	53	0	0	0	0	0	0	0	0	0	0	0	6	0	0	0
234241b254d25fff5926d11a0c99e95f	0	0	0	0	0	0	0	0	0	59	0	0	0	0	0	0	0	0	0	0	0	0	0	0	0	0	0	0	0	0	0	0	0	0	0	0	0
c5d56646922393844250e137f8f089b8	31	0	0	0	0	0	0	0	0	0	0	0	0	0	0	0	0	0	0	0	0	0	0	0	0	0	27	0	0	0	0	0	0	0	0	0	0
c01521276aa15bcbe8bd3fef51dc43f4	0	0	0	0	0	0	0	58	0	0	0	0	0	0	0	0	0	0	0	0	0	0	0	0	0	0	0	0	0	0	0	0	0	0	0	0	0
ad3d0c5d5fa002fca4b9ca361c394f23	0	58	0	0	0	0	0	0	0	0	0	0	0	0	0	0	0	0	0	0	0	0	0	0	0	0	0	0	0	0	0	0	0	0	0	0	0
29357c3d4655b9025d115355cf97e4ee	0	0	3	0	0	0	0	40	0	0	0	0	0	0	15	0	0	0	0	0	0	0	0	0	0	0	0	0	0	0	0	0	0	0	0	0	0
fda03970bff956b040c2be7bb06092a7	0	0	0	0	0	0	57	0	0	0	0	0	0	0	0	0	0	0	0	0	0	0	0	0	0	0	0	0	0	0	0	0	0	0	0	0	0
ad752f04842cf5f4368fbc4ce35eaaa4	40	0	0	0	0	0	17	0	0	0	0	0	0	0	0	0	0	0	0	0	0	0	0	0	0	0	0	0	0	0	0	0	0	0	0	0	0
957506accddd4d592a07ecacf37dd37a	0	0	0	0	0	0	0	0	0	0	57	0	0	0	0	0	0	0	0	0	0	0	0	0	0	0	0	0	0	0	0	0	0	0	0	0	0
93765af37c14d73cf68a053f4c2a89ca	0	0	0	0	0	0	0	0	0	0	0	0	0	0	0	0	0	0	0	0	0	0	0	0	0	0	0	0	0	0	57	0	0	0	0	0	0
92ad4c3c687dc6a12f3cc2f963fee537	0	0	0	0	0	0	0	0	0	0	57	0	0	0	0	0	0	0	0	0	0	0	0	0	0	0	0	0	0	0	0	0	0	0	0	0	0
41e4012ad965598d40a72aca7767f922	0	0	0	0	0	0	0	0	0	0	0	0	0	0	0	0	57	0	0	0	0	0	0	0	0	0	0	0	0	0	0	0	0	0	0	0	0
3238ea44cb3827c7130ba24d11af2406	0	0	0	0	0	0	0	0	0	0	0	0	0	57	0	0	0	0	0	0	0	0	0	0	0	0	0	0	0	0	0	0	0	0	0	0	0
311f6714ada04435829e1bb3f18f3d4c	0	0	0	0	0	43	0	3	0	0	0	0	0	0	0	11	0	0	0	0	0	0	0	0	0	0	0	0	0	0	0	0	0	0	0	0	0
24a6f9607871212a7fd008abaddf276e	0	18	0	0	0	0	0	0	0	0	0	0	0	0	0	0	0	0	0	0	0	0	0	0	39	0	0	0	0	0	0	0	0	0	0	0	0
1b1cc07c10f908d0b97142b8445a9469	0	0	0	0	0	0	0	0	0	0	53	0	0	0	0	0	0	0	0	0	0	0	0	0	0	0	0	0	0	0	0	0	4	0	0	0	0
0239c8357a794379c3a932904f15c99c	0	57	0	0	0	0	0	0	0	0	0	0	0	0	0	0	0	0	0	0	0	0	0	0	0	0	0	0	0	0	0	0	0	0	0	0	0
c10fdc5c75a4163eb0e633870b352bce	0	0	0	0	0	0	0	0	0	0	0	0	0	0	0	0	0	0	0	0	0	0	0	0	0	0	0	0	0	0	0	0	0	0	56	0	0
a2399b8c728f1a50c2a7f0b888bb2d82	0	0	0	0	0	0	0	0	0	0	0	0	0	0	0	0	0	0	0	0	56	0	0	0	0	0	0	0	0	0	0	0	0	0	0	0	0
971efaaed19a73903952e239f8ff50e6	0	0	0	0	0	0	0	0	0	0	0	0	0	0	0	0	0	0	0	0	0	0	0	0	0	0	0	0	0	0	0	0	0	0	0	56	0
77dd565610a554e815170f065ac93870	0	0	0	0	0	0	0	0	0	0	0	0	0	0	0	0	0	0	0	0	0	0	0	0	0	0	0	0	0	0	56	0	0	0	0	0	0
622780c04b6798e503ced46b37e98c30	0	0	0	0	0	0	0	0	0	56	0	0	0	0	0	0	0	0	0	0	0	0	0	0	0	0	0	0	0	0	0	0	0	0	0	0	0
5feec8097b0ca518697b849114b92cc8	0	0	0	0	0	0	0	0	0	0	0	0	0	0	0	0	0	0	0	0	0	0	0	0	0	0	0	56	0	0	0	0	0	0	0	0	0
199118740225fee0e1ef209968678383	0	0	0	0	0	56	0	0	0	0	0	0	0	0	0	0	0	0	0	0	0	0	0	0	0	0	0	0	0	0	0	0	0	0	0	0	0
111ae8f9c0154cd44791bfabbd6f8b8a	0	0	0	0	0	0	0	0	5	0	0	0	0	0	0	0	0	6	0	0	0	0	0	0	7	0	0	0	0	38	0	0	0	0	0	0	0
109841e6f62b4aa740ae603b43d0d2c1	0	0	0	0	13	0	3	0	0	37	0	0	0	0	0	0	0	0	0	0	0	0	0	0	0	3	0	0	0	0	0	0	0	0	0	0	0
101882012d253b1511d4d409ee7fa5a8	0	0	0	0	0	0	0	0	0	0	0	0	0	0	0	0	0	0	0	0	0	0	0	0	56	0	0	0	0	0	0	0	0	0	0	0	0
0d36abc36d21cd55c330e4f64fb898bb	56	0	0	0	0	0	0	0	0	0	0	0	0	0	0	0	0	0	0	0	0	0	0	0	0	0	0	0	0	0	0	0	0	0	0	0	0
eb2d3d6cf2ce45924ad25c5d26970974	0	0	0	0	0	0	0	0	0	0	0	0	0	0	0	0	0	47	0	0	0	0	0	0	0	0	0	0	0	0	0	8	0	0	0	0	0
df83db072777e3958a0bc97ccfe363c4	0	0	0	0	0	0	0	0	0	0	0	0	0	0	0	0	0	0	0	0	0	0	0	0	0	0	0	0	0	0	0	0	0	0	55	0	0
b81e464857bf5dcb25eb61cd99669f79	0	0	0	0	0	0	0	0	0	0	0	0	0	0	0	0	0	55	0	0	0	0	0	0	0	0	0	0	0	0	0	0	0	0	0	0	0
a97f6b8b01fab7a48a2a81738a075d5d	0	0	0	0	0	0	0	0	0	0	55	0	0	0	0	0	0	0	0	0	0	0	0	0	0	0	0	0	0	0	0	0	0	0	0	0	0
a5239a9b3b9d849ba7687de1376991f1	0	0	0	0	0	0	0	0	0	33	0	0	0	0	0	0	0	0	0	0	0	0	0	0	0	0	0	0	0	0	0	0	0	0	0	0	22
8a144502280be20016e69cd858bc99bd	0	0	0	0	0	0	0	0	0	0	0	0	0	0	0	0	0	0	0	0	0	0	0	0	0	0	0	0	0	0	0	11	0	0	44	0	0
721cf4e5b9388568de5279037d5ad43f	0	0	0	0	0	0	0	0	0	0	0	0	0	0	0	0	0	0	0	55	0	0	0	0	0	0	0	0	0	0	0	0	0	0	0	0	0
6776974afda984c140d392d3f4112f34	0	0	0	0	0	0	0	0	0	0	55	0	0	0	0	0	0	0	0	0	0	0	0	0	0	0	0	0	0	0	0	0	0	0	0	0	0
64c725bd086666198f699fb63c16994a	0	0	0	0	0	0	0	29	0	0	0	0	0	0	0	0	0	0	0	0	0	0	0	0	0	0	0	0	0	0	18	0	0	0	8	0	0
6366f10d8be416f359cfbe26cf81b6a3	0	0	0	0	0	0	0	0	0	0	0	0	0	0	0	0	0	0	0	0	0	55	0	0	0	0	0	0	0	0	0	0	0	0	0	0	0
3989758a810eb5355349e70c6d3e1483	0	0	0	0	0	0	0	0	0	0	0	0	0	0	0	0	0	0	0	0	0	0	0	0	0	0	0	0	0	0	0	0	0	0	0	0	55
194db4775780e99656994a951fa6db67	0	0	0	0	0	0	0	0	0	42	0	0	0	0	0	0	0	0	0	0	0	0	0	0	0	0	0	0	0	0	0	0	0	0	0	0	13
161eeba7fb1db8523b5b168928c549a3	0	0	0	0	0	0	0	0	0	0	0	0	0	0	0	0	0	0	0	0	0	0	0	0	55	0	0	0	0	0	0	0	0	0	0	0	0
eed108ef9ca85a17e8aadf43d71088dc	0	0	0	0	0	0	0	0	0	40	0	0	0	0	0	0	0	0	0	0	0	0	0	0	0	0	0	0	0	0	0	0	0	0	0	0	14
e3346bcf2a1931d8c65459d41459204b	0	39	0	0	0	0	0	0	0	0	0	0	0	0	0	0	0	0	0	0	0	0	0	0	0	0	0	0	0	6	0	9	0	0	0	0	0
a1a897022eef02bcb9882a65e864698c	0	0	0	54	0	0	0	0	0	0	0	0	0	0	0	0	0	0	0	0	0	0	0	0	0	0	0	0	0	0	0	0	0	0	0	0	0
86c5aaaf2640768086bc117fcc06e813	0	0	0	0	0	0	0	0	0	0	0	0	0	0	0	0	0	0	0	0	0	0	0	0	0	0	0	0	0	0	54	0	0	0	0	0	0
62b92c9b6dd9739d573d9832c809dcbe	0	0	0	0	0	0	0	0	0	0	0	0	0	54	0	0	0	0	0	0	0	0	0	0	0	0	0	0	0	0	0	0	0	0	0	0	0
625ecfed6025c005f334ba590a0684a4	0	0	0	0	0	0	0	0	0	0	0	0	0	0	0	0	0	0	0	0	0	0	0	0	54	0	0	0	0	0	0	0	0	0	0	0	0
1e25163207537fba912839129ad1ce9b	0	0	0	0	0	0	0	0	0	54	0	0	0	0	0	0	0	0	0	0	0	0	0	0	0	0	0	0	0	0	0	0	0	0	0	0	0
1cf52af9aaaf7e88dc591bbe6e2b2f2c	0	0	0	0	0	0	0	0	0	54	0	0	0	0	0	0	0	0	0	0	0	0	0	0	0	0	0	0	0	0	0	0	0	0	0	0	0
0fd27fc1f23ced115780db58e8669880	0	0	0	0	0	0	0	0	0	54	0	0	0	0	0	0	0	0	0	0	0	0	0	0	0	0	0	0	0	0	0	0	0	0	0	0	0
e1d3803da9534590185e9efa998d7749	0	0	0	23	0	0	0	0	0	0	0	0	0	0	0	30	0	0	0	0	0	0	0	0	0	0	0	0	0	0	0	0	0	0	0	0	0
bfbdc20f957193c2dedfc6bcf13bcc99	0	0	0	0	0	0	0	0	0	53	0	0	0	0	0	0	0	0	0	0	0	0	0	0	0	0	0	0	0	0	0	0	0	0	0	0	0
a52437c8b3203a02b773e013c13c1ee6	0	0	0	4	2	0	0	4	0	0	0	0	0	7	0	0	4	0	0	3	4	2	0	0	0	0	4	0	0	0	6	0	0	0	0	13	0
9b2324eee053e662d1537537c168e3f6	0	0	0	0	0	0	0	37	0	0	0	0	0	0	16	0	0	0	0	0	0	0	0	0	0	0	0	0	0	0	0	0	0	0	0	0	0
969ee69b55f507b29b7d6df9278f9ffc	53	0	0	0	0	0	0	0	0	0	0	0	0	0	0	0	0	0	0	0	0	0	0	0	0	0	0	0	0	0	0	0	0	0	0	0	0
90475ff7b9b0761b25fb77a11f5d5727	0	0	0	0	0	0	0	0	0	53	0	0	0	0	0	0	0	0	0	0	0	0	0	0	0	0	0	0	0	0	0	0	0	0	0	0	0
89eca89fa120e9d2e982d51381e98a4a	0	0	0	53	0	0	0	0	0	0	0	0	0	0	0	0	0	0	0	0	0	0	0	0	0	0	0	0	0	0	0	0	0	0	0	0	0
7ebc6febd5f2a2c400d4f7e8de4b053c	0	0	0	0	0	0	0	0	0	53	0	0	0	0	0	0	0	0	0	0	0	0	0	0	0	0	0	0	0	0	0	0	0	0	0	0	0
7dd17f5e39c2317e217ea524740b19d7	0	9	0	0	0	0	0	0	0	0	0	0	0	0	0	0	0	0	0	0	0	0	0	0	3	0	0	0	0	0	0	41	0	0	0	0	0
66b9a8b9ad00df82e1d05aedcc689b26	0	0	0	0	0	0	0	0	0	0	53	0	0	0	0	0	0	0	0	0	0	0	0	0	0	0	0	0	0	0	0	0	0	0	0	0	0
37050737b53bae921572a172df6195b9	0	0	0	0	53	0	0	0	0	0	0	0	0	0	0	0	0	0	0	0	0	0	0	0	0	0	0	0	0	0	0	0	0	0	0	0	0
2dda99142eeb1939985e05c2798dce0a	0	0	0	0	0	0	0	0	0	0	0	0	0	0	0	0	0	0	0	0	0	0	0	0	53	0	0	0	0	0	0	0	0	0	0	0	0
24e9ccdedc38b2c5e44413610b3e4582	0	27	0	26	0	0	0	0	0	0	0	0	0	0	0	0	0	0	0	0	0	0	0	0	0	0	0	0	0	0	0	0	0	0	0	0	0
21f5f8716c978254ffdd926ca9bef146	0	0	0	0	0	0	0	0	0	0	0	0	0	53	0	0	0	0	0	0	0	0	0	0	0	0	0	0	0	0	0	0	0	0	0	0	0
00dfca754c69573ed7f08efecf463436	0	53	0	0	0	0	0	0	0	0	0	0	0	0	0	0	0	0	0	0	0	0	0	0	0	0	0	0	0	0	0	0	0	0	0	0	0
fbb9a122598633f5cc31f23b9ff6501b	0	0	0	0	0	0	0	0	0	0	0	0	0	0	0	0	0	0	0	0	0	0	0	0	0	52	0	0	0	0	0	0	0	0	0	0	0
fb2724e10da8e8b450c85ab5208769b4	0	23	0	0	0	0	0	0	0	0	0	0	0	0	0	0	0	0	0	0	0	0	0	0	4	0	0	0	0	0	0	25	0	0	0	0	0
f72c0fc4a4c963091cffe87d51bc0015	0	0	0	0	0	0	0	0	0	0	0	0	0	0	0	0	0	0	0	0	0	0	0	0	0	0	0	0	0	0	0	0	0	0	0	52	0
eca4e82dbff3966d353c00edd3cb01dc	0	0	0	0	0	0	0	0	0	0	0	0	0	0	52	0	0	0	0	0	0	0	0	0	0	0	0	0	0	0	0	0	0	0	0	0	0
d49f7af3b8d0d8775b08f1031e671d76	0	0	0	0	0	0	0	0	0	0	0	0	0	0	0	0	0	0	0	0	0	0	0	0	0	0	0	0	0	0	0	0	0	17	35	0	0
aea717bad3073942ce005235e184eca5	0	0	0	0	0	0	0	0	0	0	0	0	0	0	0	0	3	0	0	0	49	0	0	0	0	0	0	0	0	0	0	0	0	0	0	0	0
79df23ce6a837989a82c372a11bec32d	52	0	0	0	0	0	0	0	0	0	0	0	0	0	0	0	0	0	0	0	0	0	0	0	0	0	0	0	0	0	0	0	0	0	0	0	0
4fd2d1b98369d89f8eaa999b93406432	0	0	0	0	0	0	0	0	0	0	0	0	0	0	0	0	0	0	0	0	0	0	0	9	0	43	0	0	0	0	0	0	0	0	0	0	0
2c7eddf56699ca0438dc6aa23d368daf	0	0	0	0	0	0	0	0	0	0	0	0	0	0	52	0	0	0	0	0	0	0	0	0	0	0	0	0	0	0	0	0	0	0	0	0	0
2376d16e9a309b9063ed897738bc5b40	0	0	0	0	0	0	0	0	0	0	0	0	0	0	0	0	0	0	0	0	0	0	0	52	0	0	0	0	0	0	0	0	0	0	0	0	0
f2d14da447ec8212ef55d0ed889f736b	0	0	0	0	0	0	0	0	0	0	0	0	0	0	0	0	0	0	0	0	0	0	0	0	0	0	0	0	0	18	0	0	0	0	33	0	0
f1b2e7bc20c99cb751abf46e3f082119	0	0	0	0	51	0	0	0	0	0	0	0	0	0	0	0	0	0	0	0	0	0	0	0	0	0	0	0	0	0	0	0	0	0	0	0	0
e17994e509c217e7587f4675e7b1d22f	10	16	0	0	0	0	0	0	0	0	0	0	0	0	9	0	0	0	0	0	0	0	0	0	0	0	0	0	0	0	0	16	0	0	0	0	0
c31d51634e4898198d514eaafb5ab066	0	0	0	0	51	0	0	0	0	0	0	0	0	0	0	0	0	0	0	0	0	0	0	0	0	0	0	0	0	0	0	0	0	0	0	0	0
a2c7282a5954efd4390a9b5e0d1e3efa	0	0	0	0	0	0	0	0	0	0	0	0	0	0	0	0	0	0	0	0	0	0	0	0	0	0	0	0	0	0	0	0	51	0	0	0	0
8b11dc50d1d6ce9017bc41001cdb76d6	0	0	0	0	0	51	0	0	0	0	0	0	0	0	0	0	0	0	0	0	0	0	0	0	0	0	0	0	0	0	0	0	0	0	0	0	0
6f205a5147394fee44c94404ff5aed7c	0	0	0	0	0	0	0	0	0	51	0	0	0	0	0	0	0	0	0	0	0	0	0	0	0	0	0	0	0	0	0	0	0	0	0	0	0
56816290f86e66baf40a011f384a8a7e	0	0	0	0	0	0	0	0	51	0	0	0	0	0	0	0	0	0	0	0	0	0	0	0	0	0	0	0	0	0	0	0	0	0	0	0	0
512b6214d8b518cb05dd7ada44e70677	51	0	0	0	0	0	0	0	0	0	0	0	0	0	0	0	0	0	0	0	0	0	0	0	0	0	0	0	0	0	0	0	0	0	0	0	0
3f779905eef4cba027107b2922a7db39	0	0	0	0	0	0	0	0	0	0	0	0	0	51	0	0	0	0	0	0	0	0	0	0	0	0	0	0	0	0	0	0	0	0	0	0	0
3e5162addf013eb3d2bcf823c6e2af52	0	0	0	0	0	0	0	0	0	51	0	0	0	0	0	0	0	0	0	0	0	0	0	0	0	0	0	0	0	0	0	0	0	0	0	0	0
3abf4cfe55d68190126285e56b3125ab	0	0	0	0	0	0	0	0	0	0	0	0	0	0	0	45	0	0	0	0	0	0	0	0	6	0	0	0	0	0	0	0	0	0	0	0	0
337db581725603ce7d689e48c41a8a6c	0	0	0	0	0	0	0	0	0	0	0	0	0	0	0	0	0	0	0	0	0	0	0	0	0	0	0	0	0	0	0	0	0	51	0	0	0
262576068680efeacc82b312a2c2317e	51	0	0	0	0	0	0	0	0	0	0	0	0	0	0	0	0	0	0	0	0	0	0	0	0	0	0	0	0	0	0	0	0	0	0	0	0
2364abc71259d3aef16ff1f4f1dc80ce	0	0	0	51	0	0	0	0	0	0	0	0	0	0	0	0	0	0	0	0	0	0	0	0	0	0	0	0	0	0	0	0	0	0	0	0	0
0e4f81caf76a6854f4fd62ded0b0aa84	0	0	0	0	0	0	0	0	0	28	0	0	0	0	0	0	0	0	0	0	0	0	0	0	0	0	0	10	0	0	0	0	0	0	0	0	13
e25aa7290b601550b647331adad23939	0	0	0	0	0	0	0	0	0	50	0	0	0	0	0	0	0	0	0	0	0	0	0	0	0	0	0	0	0	0	0	0	0	0	0	0	0
d5d69fae4b8651a855c22ce3b4bd969e	0	50	0	0	0	0	0	0	0	0	0	0	0	0	0	0	0	0	0	0	0	0	0	0	0	0	0	0	0	0	0	0	0	0	0	0	0
bc2de833ab7b9d51e9ef0941d45e27e8	0	50	0	0	0	0	0	0	0	0	0	0	0	0	0	0	0	0	0	0	0	0	0	0	0	0	0	0	0	0	0	0	0	0	0	0	0
ac9d66c6f8b73682b526225c88b74224	0	0	0	0	0	0	0	0	0	0	0	0	0	0	0	0	0	0	0	0	0	0	0	0	50	0	0	0	0	0	0	0	0	0	0	0	0
a3ed4c2d2c4ca377004a9acca7b02681	0	0	0	0	14	0	0	0	0	3	0	0	0	0	0	0	0	0	0	0	0	0	27	0	0	0	0	6	0	0	0	0	0	0	0	0	0
9a2d3325dac3e185fb4f9a8212a9f701	0	0	0	0	0	0	0	0	0	0	0	0	0	0	0	0	0	0	0	0	0	0	0	0	0	0	0	0	0	50	0	0	0	0	0	0	0
93cf5281fba3e489c6f1b5713e810638	0	0	0	0	0	0	0	0	0	0	50	0	0	0	0	0	0	0	0	0	0	0	0	0	0	0	0	0	0	0	0	0	0	0	0	0	0
7b3a76e41f1568385172d241acbb1e61	0	0	0	50	0	0	0	0	0	0	0	0	0	0	0	0	0	0	0	0	0	0	0	0	0	0	0	0	0	0	0	0	0	0	0	0	0
5c74295e79d5dad433a48a46658e22d6	0	0	0	0	0	0	0	0	0	0	0	0	0	50	0	0	0	0	0	0	0	0	0	0	0	0	0	0	0	0	0	0	0	0	0	0	0
350dc52cb1432420083a2241bca82c8f	0	0	0	0	0	0	0	50	0	0	0	0	0	0	0	0	0	0	0	0	0	0	0	0	0	0	0	0	0	0	0	0	0	0	0	0	0
21aeca3bc52851ab77794e2e07fcc8dc	0	0	0	0	0	0	0	0	0	0	0	0	0	0	0	0	0	0	0	0	0	0	0	0	50	0	0	0	0	0	0	0	0	0	0	0	0
1e7e596ebd41d8b9dda3cec8c9b6375b	0	0	0	0	0	0	0	0	0	0	0	0	0	0	0	0	0	0	0	0	0	0	0	0	0	0	0	0	0	0	0	0	0	50	0	0	0
decb081e6e00f63f81d586b49919cf05	0	0	0	0	0	0	0	0	0	0	0	0	0	0	0	49	0	0	0	0	0	0	0	0	0	0	0	0	0	0	0	0	0	0	0	0	0
d1870e35efc0c9873a6aafe105e2652b	0	0	0	0	0	0	0	0	0	49	0	0	0	0	0	0	0	0	0	0	0	0	0	0	0	0	0	0	0	0	0	0	0	0	0	0	0
ce3381a9a902716febe2501680a964b5	0	0	0	0	0	0	0	0	0	49	0	0	0	0	0	0	0	0	0	0	0	0	0	0	0	0	0	0	0	0	0	0	0	0	0	0	0
9f40ecb36085b36e3d772ad640ce907b	0	49	0	0	0	0	0	0	0	0	0	0	0	0	0	0	0	0	0	0	0	0	0	0	0	0	0	0	0	0	0	0	0	0	0	0	0
99158139e6f48afe52d7966673e98a2c	0	0	0	0	0	0	0	0	0	0	0	0	0	0	0	0	0	0	0	0	0	49	0	0	0	0	0	0	0	0	0	0	0	0	0	0	0
9646fb40b1761eee12c304072ddf2085	0	2	0	0	23	0	0	0	14	0	0	0	0	0	0	0	0	0	0	10	0	0	0	0	0	0	0	0	0	0	0	0	0	0	0	0	0
91c04461e79e92606b8a49d905d073e3	0	0	0	0	0	0	0	0	0	0	0	0	0	0	0	0	49	0	0	0	0	0	0	0	0	0	0	0	0	0	0	0	0	0	0	0	0
7c22d4e5867d5ce51e96d9b0c2005a32	0	0	0	0	0	0	0	0	0	0	0	0	0	0	0	0	0	0	0	0	0	0	0	0	0	0	0	0	0	0	49	0	0	0	0	0	0
6d446e7fd94ba87a58cfc9689b19d2b7	0	0	0	0	0	0	0	8	0	0	0	0	0	0	34	0	0	0	0	0	0	0	0	0	0	0	7	0	0	0	0	0	0	0	0	0	0
40a5a2930942343a8f1efba56a86c556	0	0	0	0	0	0	0	0	49	0	0	0	0	0	0	0	0	0	0	0	0	0	0	0	0	0	0	0	0	0	0	0	0	0	0	0	0
405217e39c20d49c0c42623f0b64f6d1	0	0	0	0	0	33	0	16	0	0	0	0	0	0	0	0	0	0	0	0	0	0	0	0	0	0	0	0	0	0	0	0	0	0	0	0	0
1ca6c18ed0ccec4beae63d6b72e77d97	0	37	0	0	0	0	0	0	0	0	0	0	0	0	0	0	0	0	12	0	0	0	0	0	0	0	0	0	0	0	0	0	0	0	0	0	0
180d432c235d0ed93cdfee24e12bdb86	0	49	0	0	0	0	0	0	0	0	0	0	0	0	0	0	0	0	0	0	0	0	0	0	0	0	0	0	0	0	0	0	0	0	0	0	0
0998fe271e306fe702c31d47d4eb8fe2	0	0	0	0	0	0	0	0	0	0	0	0	0	0	0	0	0	0	0	0	0	0	0	49	0	0	0	0	0	0	0	0	0	0	0	0	0
d379062819086406dc213e64ef8fdf89	0	0	0	0	0	0	0	48	0	0	0	0	0	0	0	0	0	0	0	0	0	0	0	0	0	0	0	0	0	0	0	0	0	0	0	0	0
c6a649702b52e9568ab8287de58e833c	48	0	0	0	0	0	0	0	0	0	0	0	0	0	0	0	0	0	0	0	0	0	0	0	0	0	0	0	0	0	0	0	0	0	0	0	0
c28b5fc53b935bcc1632e5ea4989c80e	0	0	0	0	0	0	0	0	0	0	0	0	0	0	0	0	0	0	0	0	0	0	0	0	0	0	0	0	0	0	0	0	0	0	48	0	0
a861851e01989b9b176d497fb9298672	0	0	0	0	48	0	0	0	0	0	0	0	0	0	0	0	0	0	0	0	0	0	0	0	0	0	0	0	0	0	0	0	0	0	0	0	0
a164aed47061ed3b80aff8d044f84c21	0	0	0	0	0	0	0	0	0	0	0	0	0	0	0	0	0	48	0	0	0	0	0	0	0	0	0	0	0	0	0	0	0	0	0	0	0
5d304cca9508235dae08e68626f35840	0	0	0	0	0	0	0	0	0	0	0	0	0	0	0	0	0	0	0	0	0	0	0	0	0	0	0	0	0	0	0	48	0	0	0	0	0
5881db967f86cb37c01e85ca69dbce10	48	0	0	0	0	0	0	0	0	0	0	0	0	0	0	0	0	0	0	0	0	0	0	0	0	0	0	0	0	0	0	0	0	0	0	0	0
43edf955c0750ba6765b3d8fb463a4f0	0	0	0	0	0	0	0	0	0	0	0	0	0	0	0	0	0	0	0	0	0	0	0	0	0	0	0	0	0	0	0	0	0	0	0	0	48
40c9702f93e4773ac6ec2287efd3bb13	0	0	0	0	0	0	0	0	0	0	0	0	0	0	0	0	0	48	0	0	0	0	0	0	0	0	0	0	0	0	0	0	0	0	0	0	0
df2b90d6f33122073e7d05d102920b3d	0	0	0	0	0	0	0	0	0	0	0	0	0	0	47	0	0	0	0	0	0	0	0	0	0	0	0	0	0	0	0	0	0	0	0	0	0
d31b00bf46282419cc3e31cca0af75d8	0	27	0	0	0	0	0	0	0	0	0	0	0	0	0	0	0	0	0	0	0	0	0	0	16	0	0	0	0	0	0	4	0	0	0	0	0
cb5424fd4379a19e7d95e5d97ca777e8	0	0	0	0	0	0	0	0	0	0	0	0	0	0	0	0	0	0	0	0	0	0	0	47	0	0	0	0	0	0	0	0	0	0	0	0	0
ca6caae7ca9dfd1b43d25ebd36679461	0	47	0	0	0	0	0	0	0	0	0	0	0	0	0	0	0	0	0	0	0	0	0	0	0	0	0	0	0	0	0	0	0	0	0	0	0
c507a0c74e52dc9b8fabb51f1dbb7dbf	0	0	0	0	0	0	0	0	0	0	47	0	0	0	0	0	0	0	0	0	0	0	0	0	0	0	0	0	0	0	0	0	0	0	0	0	0
b1dd0b24337245a20c8018705cc82bb7	0	0	0	47	0	0	0	0	0	0	0	0	0	0	0	0	0	0	0	0	0	0	0	0	0	0	0	0	0	0	0	0	0	0	0	0	0
9bbc644308758b612dcb18fe874c4e8c	0	0	0	0	0	0	0	0	0	0	0	0	0	0	0	0	0	0	0	0	0	0	0	0	0	0	0	0	0	21	0	0	0	0	0	0	26
8d76b58f4f9df3ff77261711f0069918	47	0	0	0	0	0	0	0	0	0	0	0	0	0	0	0	0	0	0	0	0	0	0	0	0	0	0	0	0	0	0	0	0	0	0	0	0
4ced54cd6af62ce1f42bb9acfd58f75c	0	0	0	0	0	0	0	0	0	0	0	0	0	0	0	0	0	0	0	0	0	0	0	0	0	0	0	27	0	0	10	10	0	0	0	0	0
411d423c2180a4541644dbb7b87ef5f2	0	0	0	0	0	0	0	0	0	0	0	0	0	0	0	0	0	0	0	0	0	0	0	0	47	0	0	0	0	0	0	0	0	0	0	0	0
40c5a4e0f89303e8c19bca912abbb797	16	0	0	0	0	0	0	0	0	0	0	0	0	0	0	0	0	0	0	0	0	0	0	0	0	0	0	0	0	0	31	0	0	0	0	0	0
37a06c42596c63a14a5a74dd9076488e	0	0	0	0	0	0	0	0	0	0	0	0	0	0	0	0	0	0	0	0	0	0	0	0	0	47	0	0	0	0	0	0	0	0	0	0	0
32efa80f7ebe0a803407e5d801ba3b02	0	0	0	0	0	0	0	0	0	0	0	0	0	0	0	0	0	0	0	0	0	0	0	47	0	0	0	0	0	0	0	0	0	0	0	0	0
2ed375affd986024d7d4246a2f1967e2	0	0	0	0	47	0	0	0	0	0	0	0	0	0	0	0	0	0	0	0	0	0	0	0	0	0	0	0	0	0	0	0	0	0	0	0	0
1aa478d66b43e2d8615398dd46e84729	0	0	0	0	0	0	0	0	47	0	0	0	0	0	0	0	0	0	0	0	0	0	0	0	0	0	0	0	0	0	0	0	0	0	0	0	0
0e4b9ce7bbe26a8d917ebc7826fc5ac1	0	0	0	0	47	0	0	0	0	0	0	0	0	0	0	0	0	0	0	0	0	0	0	0	0	0	0	0	0	0	0	0	0	0	0	0	0
f5aeee433f015b1d67b93bf03b74545f	46	0	0	0	0	0	0	0	0	0	0	0	0	0	0	0	0	0	0	0	0	0	0	0	0	0	0	0	0	0	0	0	0	0	0	0	0
d9eaed2bf3045ee75c183a7c77fa86ad	0	0	0	0	0	0	21	0	0	0	25	0	0	0	0	0	0	0	0	0	0	0	0	0	0	0	0	0	0	0	0	0	0	0	0	0	0
d49c76005bd93df9c73af5350d384989	0	4	0	0	0	0	0	4	0	0	0	0	0	28	0	0	0	0	0	0	0	0	0	0	0	0	0	0	0	0	0	0	0	10	0	0	0
6684d734f9a3607214618eaa454781dd	0	0	0	0	0	0	0	0	0	46	0	0	0	0	0	0	0	0	0	0	0	0	0	0	0	0	0	0	0	0	0	0	0	0	0	0	0
58324f961f4fb8e561da43dd641c9d3f	46	0	0	0	0	0	0	0	0	0	0	0	0	0	0	0	0	0	0	0	0	0	0	0	0	0	0	0	0	0	0	0	0	0	0	0	0
50f800991e92d1fa23908ff034705b74	0	0	0	0	0	0	0	0	0	0	0	0	0	0	0	0	0	0	0	0	0	0	0	23	0	23	0	0	0	0	0	0	0	0	0	0	0
3e7522a3fea4ac5ab340d99563d48a46	0	0	0	46	0	0	0	0	0	0	0	0	0	0	0	0	0	0	0	0	0	0	0	0	0	0	0	0	0	0	0	0	0	0	0	0	0
38c12d89b6bc7f60874137fe04da0204	0	0	0	0	0	0	0	0	0	0	0	0	0	0	46	0	0	0	0	0	0	0	0	0	0	0	0	0	0	0	0	0	0	0	0	0	0
38960e4376489552c9740e4155092b33	0	0	0	0	0	0	0	0	0	0	0	0	0	0	0	0	0	0	0	0	0	0	0	0	46	0	0	0	0	0	0	0	0	0	0	0	0
31b9ed293c0ff1338c06d78d05ca9c42	46	0	0	0	0	0	0	0	0	0	0	0	0	0	0	0	0	0	0	0	0	0	0	0	0	0	0	0	0	0	0	0	0	0	0	0	0
174e72d05ae9e45165900619e9035a71	0	0	0	0	0	0	0	0	0	0	0	0	0	0	0	0	0	0	0	0	0	0	0	46	0	0	0	0	0	0	0	0	0	0	0	0	0
ea5a47dd5056f055855dd261d04af1d5	0	0	0	0	0	0	0	0	0	0	0	0	0	0	0	0	0	0	0	0	0	0	0	0	45	0	0	0	0	0	0	0	0	0	0	0	0
d7193bfdd26c5b5f7bc0ec3ba5fedb71	0	45	0	0	0	0	0	0	0	0	0	0	0	0	0	0	0	0	0	0	0	0	0	0	0	0	0	0	0	0	0	0	0	0	0	0	0
d4ec6c0ca8bade3004e3799ac2f971a0	19	0	0	0	0	0	0	0	0	26	0	0	0	0	0	0	0	0	0	0	0	0	0	0	0	0	0	0	0	0	0	0	0	0	0	0	0
c1110994797651c5d4412b9a1c6614e8	0	0	0	0	0	0	0	0	0	0	0	0	0	0	0	0	0	0	0	0	0	0	0	0	0	0	0	0	0	0	0	0	0	45	0	0	0
acc378a8bb4dd046c665d54bad7b3669	0	0	0	0	0	0	0	0	0	0	0	0	0	0	0	0	0	0	0	16	0	0	0	0	0	0	0	7	0	0	0	0	0	0	0	0	22
8cfa4ff13f76b3573f93a22cd0c8b3d2	0	0	0	0	0	0	0	45	0	0	0	0	0	0	0	0	0	0	0	0	0	0	0	0	0	0	0	0	0	0	0	0	0	0	0	0	0
8818d8cd26a1fa57a8410b6bcd4e16b9	0	45	0	0	0	0	0	0	0	0	0	0	0	0	0	0	0	0	0	0	0	0	0	0	0	0	0	0	0	0	0	0	0	0	0	0	0
7cab5f54b5667fed0a8e34583a2a28bb	0	0	0	0	0	0	0	45	0	0	0	0	0	0	0	0	0	0	0	0	0	0	0	0	0	0	0	0	0	0	0	0	0	0	0	0	0
6c3c2a9a150fb0b358aeb5f23d436db9	0	0	0	0	0	0	0	0	0	0	0	0	0	45	0	0	0	0	0	0	0	0	0	0	0	0	0	0	0	0	0	0	0	0	0	0	0
6895d26930fdca8390c9eacccbc913d2	0	0	0	0	0	0	0	0	0	0	0	0	0	0	0	0	0	0	45	0	0	0	0	0	0	0	0	0	0	0	0	0	0	0	0	0	0
4d31ff8bcf797f08e2dfe11c6e58f40a	0	0	0	0	0	0	0	0	45	0	0	0	0	0	0	0	0	0	0	0	0	0	0	0	0	0	0	0	0	0	0	0	0	0	0	0	0
421827bc3dc937dcf5f7e9fd839a4679	0	0	0	0	0	0	0	0	0	0	0	0	0	0	0	0	0	0	0	0	0	0	0	0	45	0	0	0	0	0	0	0	0	0	0	0	0
25e74483663d2c5a62aac53031c95e7c	0	0	0	0	0	0	0	0	0	31	0	0	0	0	0	0	0	0	0	0	0	0	0	0	0	0	0	0	0	0	0	0	14	0	0	0	0
22e08646a28fd92f3b5f917d15775428	12	4	0	0	0	0	0	0	0	8	0	0	0	5	0	0	0	0	0	0	0	4	0	0	0	3	0	0	0	3	0	0	6	0	0	0	0
fde0729634c490d5c8812845c2b3e4f7	0	0	0	0	0	0	0	0	0	0	0	0	0	0	0	0	0	0	0	0	0	40	4	0	0	0	0	0	0	0	0	0	0	0	0	0	0
f87483edb207f35fceeac8344ee875ec	0	0	0	0	0	0	0	0	0	0	0	0	0	0	44	0	0	0	0	0	0	0	0	0	0	0	0	0	0	0	0	0	0	0	0	0	0
f5f6d31072cc354108b98f31a76806e3	0	0	0	0	0	0	0	0	0	0	0	0	0	0	0	0	44	0	0	0	0	0	0	0	0	0	0	0	0	0	0	0	0	0	0	0	0
b8c702766aa0147ea7e099a7fd100649	0	0	0	44	0	0	0	0	0	0	0	0	0	0	0	0	0	0	0	0	0	0	0	0	0	0	0	0	0	0	0	0	0	0	0	0	0
afa892bba93d20dccc406fd5ce00a057	0	0	0	0	0	0	0	44	0	0	0	0	0	0	0	0	0	0	0	0	0	0	0	0	0	0	0	0	0	0	0	0	0	0	0	0	0
989d410643994ba15d83bbff407cf072	0	0	0	0	0	0	0	0	0	0	0	0	0	0	0	0	0	0	0	0	0	0	0	44	0	0	0	0	0	0	0	0	0	0	0	0	0
898edfeed0604c59d484185f31b1056c	0	0	0	0	0	0	0	0	0	0	0	0	0	0	0	0	0	0	0	0	0	0	0	0	0	0	0	0	0	0	0	0	0	0	44	0	0
8337d20651876c791f7865762eb9ab65	0	0	0	0	0	0	0	0	0	0	0	0	0	0	0	0	0	0	0	0	0	0	0	0	0	0	0	0	0	0	0	44	0	0	0	0	0
77d561a4831ef5d2ff4b6df213ebe01d	0	0	0	0	0	0	0	0	32	0	0	0	0	0	0	0	0	0	0	0	0	0	0	0	12	0	0	0	0	0	0	0	0	0	0	0	0
77049d75f92fc520bc58d4f5e9f1335c	0	0	0	0	0	0	0	0	0	0	0	0	0	0	0	0	0	0	0	0	0	0	0	0	0	0	0	0	0	0	0	0	0	22	22	0	0
606b12267cb660b9253ef0fbe7a2a394	0	0	0	0	44	0	0	0	0	0	0	0	0	0	0	0	0	0	0	0	0	0	0	0	0	0	0	0	0	0	0	0	0	0	0	0	0
22137d1790d2ffe309e79924f490589e	0	0	0	0	0	0	0	0	44	0	0	0	0	0	0	0	0	0	0	0	0	0	0	0	0	0	0	0	0	0	0	0	0	0	0	0	0
1d1e0573a574a67f4ffe34c4c47269d2	0	0	0	0	0	0	0	0	0	0	0	0	0	0	0	0	0	0	0	0	0	0	0	0	0	0	0	0	0	0	0	0	44	0	0	0	0
171a720661cf32476996a1cf99cec056	32	0	12	0	0	0	0	0	0	0	0	0	0	0	0	0	0	0	0	0	0	0	0	0	0	0	0	0	0	0	0	0	0	0	0	0	0
0e86d47168e5c995f8990779c9c5b51a	14	18	0	0	0	0	0	0	0	0	5	0	0	0	0	0	0	0	0	0	0	0	0	0	0	0	0	0	0	0	0	0	7	0	0	0	0
0c549bd3372369560066a4564afff3a5	0	0	0	0	0	0	0	19	0	0	0	0	0	0	25	0	0	0	0	0	0	0	0	0	0	0	0	0	0	0	0	0	0	0	0	0	0
0a69d385d351dd3a43eab7f6497b83dd	0	0	0	0	0	0	0	0	0	0	0	0	0	0	0	0	0	0	0	0	0	0	0	0	0	0	0	0	0	0	0	0	0	0	0	0	44
f4eb722e1904a5f71dab19d9ec2a750e	43	0	0	0	0	0	0	0	0	0	0	0	0	0	0	0	0	0	0	0	0	0	0	0	0	0	0	0	0	0	0	0	0	0	0	0	0
ed72211c4b454ebf4261d8f9e69b95ba	0	0	0	0	0	0	24	0	0	0	0	0	0	0	0	2	0	0	0	0	0	0	0	0	0	0	0	0	0	0	0	0	0	0	0	0	17
de0b4bbc03dac8bb5b7c7cff2ab3ec71	0	0	0	0	0	0	0	0	0	0	0	0	0	0	0	0	0	24	19	0	0	0	0	0	0	0	0	0	0	0	0	0	0	0	0	0	0
dd73385bd3b71cef6e5250b206d82d4a	0	0	0	0	0	0	0	0	0	0	0	0	0	0	0	0	0	43	0	0	0	0	0	0	0	0	0	0	0	0	0	0	0	0	0	0	0
da185943062e8dee1ad506d607285ac6	0	0	0	0	0	0	0	0	0	0	0	0	0	0	0	0	0	0	0	0	0	0	0	0	0	0	0	24	0	16	0	0	0	3	0	0	0
cfec875a97c330ce86668ce2719fac4b	0	0	0	0	0	0	0	43	0	0	0	0	0	0	0	0	0	0	0	0	0	0	0	0	0	0	0	0	0	0	0	0	0	0	0	0	0
c7fc4d45f2592f4caa0d8e0ac258ba28	0	0	0	0	0	0	0	0	0	0	0	0	0	43	0	0	0	0	0	0	0	0	0	0	0	0	0	0	0	0	0	0	0	0	0	0	0
ade0fec0958638188ebea275d589b12f	0	0	0	0	0	0	0	0	0	0	23	0	0	0	0	0	0	0	0	0	0	0	0	0	0	0	0	0	20	0	0	0	0	0	0	0	0
a8fa6705cd709912364cd958e673a227	0	43	0	0	0	0	0	0	0	0	0	0	0	0	0	0	0	0	0	0	0	0	0	0	0	0	0	0	0	0	0	0	0	0	0	0	0
a192568b93e1004a98fef40e19f0688c	0	0	0	0	0	0	0	0	0	0	0	0	0	0	0	0	0	0	4	7	0	0	15	2	0	0	2	0	0	0	0	0	0	0	13	0	0
9c99ed0d40a1d92e69cbb8ccf38fd183	0	0	0	0	0	0	0	0	0	43	0	0	0	0	0	0	0	0	0	0	0	0	0	0	0	0	0	0	0	0	0	0	0	0	0	0	0
953d73633263164d4c1f46373cb2022c	0	0	0	0	0	0	0	2	0	0	0	3	0	0	4	0	3	0	0	0	0	7	6	8	0	0	0	0	0	0	0	3	7	0	0	0	0
6beef54a83d26f851866154558bb169e	0	0	0	0	0	0	0	0	0	43	0	0	0	0	0	0	0	0	0	0	0	0	0	0	0	0	0	0	0	0	0	0	0	0	0	0	0
35b0e2c626610e6a89bcf12b5ead4a82	0	0	0	0	0	0	0	0	0	0	0	0	0	0	0	0	0	0	0	0	0	0	0	0	0	0	0	0	0	0	0	0	0	0	0	0	43
3448d1bf6cccbbf7b14c71b09817cba4	0	0	0	0	0	0	0	43	0	0	0	0	0	0	0	0	0	0	0	0	0	0	0	0	0	0	0	0	0	0	0	0	0	0	0	0	0
1cd8cf643bb44bb6f8656c6308dcecf8	0	0	0	0	0	0	0	0	0	0	0	0	0	0	0	0	43	0	0	0	0	0	0	0	0	0	0	0	0	0	0	0	0	0	0	0	0
1b6a6dc29299be0ad1b1800a60b70ab8	0	0	0	0	12	0	0	0	0	0	0	0	0	31	0	0	0	0	0	0	0	0	0	0	0	0	0	0	0	0	0	0	0	0	0	0	0
fb048eea171c7ea369f369a50addcdd2	0	0	0	0	0	0	0	0	0	42	0	0	0	0	0	0	0	0	0	0	0	0	0	0	0	0	0	0	0	0	0	0	0	0	0	0	0
f3886863f19ac2a3fe5b154e6bbb2a74	0	0	0	0	0	0	0	0	0	0	0	0	0	0	0	0	0	0	0	0	0	0	0	0	0	25	0	17	0	0	0	0	0	0	0	0	0
cfc025739252c420da343681e66715e5	42	0	0	0	0	0	0	0	0	0	0	0	0	0	0	0	0	0	0	0	0	0	0	0	0	0	0	0	0	0	0	0	0	0	0	0	0
c7b04a26bea9826227e9b98c04ba7a37	0	0	0	0	0	0	0	0	0	42	0	0	0	0	0	0	0	0	0	0	0	0	0	0	0	0	0	0	0	0	0	0	0	0	0	0	0
a23e8847d9cb38a73400f30e0ffe0b19	0	0	0	0	0	0	0	0	0	0	0	0	0	0	0	0	0	0	0	0	0	0	0	0	0	0	0	0	0	0	42	0	0	0	0	0	0
99a1109d54d255bc16c9113214448c76	0	0	0	0	0	0	0	0	0	0	0	0	0	0	0	0	0	0	0	0	6	0	0	0	0	0	0	26	0	0	0	0	0	10	0	0	0
9849a7d79f6c37027a4fa2749dfbfe6c	0	0	0	0	0	0	0	0	0	0	0	0	0	0	0	0	0	0	0	0	0	0	0	0	0	0	0	0	0	0	0	0	0	39	3	0	0
8b84e83555c7d5701db7058244e4f786	0	0	0	0	0	0	0	0	0	0	0	0	0	0	0	0	0	0	0	0	0	0	0	42	0	0	0	0	0	0	0	0	0	0	0	0	0
742481b7d7ba57e6f7de56113d59cd73	0	0	0	0	0	0	0	0	0	42	0	0	0	0	0	0	0	0	0	0	0	0	0	0	0	0	0	0	0	0	0	0	0	0	0	0	0
5832a67565d38df80c3b0eb93f157cc0	0	0	0	42	0	0	0	0	0	0	0	0	0	0	0	0	0	0	0	0	0	0	0	0	0	0	0	0	0	0	0	0	0	0	0	0	0
fcedcc8959387071185ff6c146c737f5	0	8	0	0	0	0	0	0	0	0	0	0	0	0	9	13	0	9	0	0	2	0	0	0	0	0	0	0	0	0	0	0	0	0	0	0	0
f40b167a9f8375843a047772adbc47bf	0	0	0	0	0	0	0	0	0	0	0	0	0	0	0	0	0	0	0	0	0	0	0	0	41	0	0	0	0	0	0	0	0	0	0	0	0
eb31e9c4fb631412469b4d21300d0e5a	0	0	0	0	0	0	0	41	0	0	0	0	0	0	0	0	0	0	0	0	0	0	0	0	0	0	0	0	0	0	0	0	0	0	0	0	0
d9555d17259bf590b1f4d7d09b0349c9	0	41	0	0	0	0	0	0	0	0	0	0	0	0	0	0	0	0	0	0	0	0	0	0	0	0	0	0	0	0	0	0	0	0	0	0	0
d43d99ddd1086b488461d62f23eaa8bc	0	0	0	0	0	0	0	0	0	0	0	0	0	0	0	0	0	0	0	0	0	41	0	0	0	0	0	0	0	0	0	0	0	0	0	0	0
be30a440a71a8c6d3ce2a5ed6724aa16	0	0	0	0	0	0	0	0	0	0	0	0	0	0	0	0	0	0	0	0	0	0	0	0	0	41	0	0	0	0	0	0	0	0	0	0	0
bc58e52b8c5f88cf15f996e1985bfc29	0	0	0	0	0	0	0	0	0	0	0	0	0	0	0	41	0	0	0	0	0	0	0	0	0	0	0	0	0	0	0	0	0	0	0	0	0
b352e3a8d02f54225463ea3b7f1b9f6d	0	19	0	0	0	0	0	0	0	0	0	0	0	0	0	0	0	0	0	0	0	0	0	0	0	0	0	0	0	2	0	9	0	0	11	0	0
a76f6b105306ec1a0beb002d4a3280a7	0	41	0	0	0	0	0	0	0	0	0	0	0	0	0	0	0	0	0	0	0	0	0	0	0	0	0	0	0	0	0	0	0	0	0	0	0
a4b5a2151f4924716b73e76199e1e2b0	0	0	0	0	0	0	0	14	0	0	0	0	0	0	0	0	0	0	0	27	0	0	0	0	0	0	0	0	0	0	0	0	0	0	0	0	0
a1bc96cc85b17b394362c8e8be2f40b8	0	0	0	0	0	0	0	0	0	0	0	0	0	0	0	0	0	0	0	0	0	23	0	0	0	0	0	0	0	0	18	0	0	0	0	0	0
7bb298cd7210640602eb2b1e1dcfa495	0	0	0	0	0	0	0	0	0	0	0	0	0	0	0	0	0	0	0	0	0	0	0	0	41	0	0	0	0	0	0	0	0	0	0	0	0
61bdf88ee0a5a05730779d85c1087c18	0	0	0	0	0	0	41	0	0	0	0	0	0	0	0	0	0	0	0	0	0	0	0	0	0	0	0	0	0	0	0	0	0	0	0	0	0
601640dcc94fa628f6820a29437a5288	0	0	0	0	0	0	0	0	0	0	0	0	0	41	0	0	0	0	0	0	0	0	0	0	0	0	0	0	0	0	0	0	0	0	0	0	0
4bcc2c0fcb87b69c749fb604bb319311	0	41	0	0	0	0	0	0	0	0	0	0	0	0	0	0	0	0	0	0	0	0	0	0	0	0	0	0	0	0	0	0	0	0	0	0	0
3d0b93be1bec378bbe910096881c29fa	0	0	0	0	0	0	0	0	41	0	0	0	0	0	0	0	0	0	0	0	0	0	0	0	0	0	0	0	0	0	0	0	0	0	0	0	0
3ab0f5d0fa08e11dda8aba5d3fd04b89	0	41	0	0	0	0	0	0	0	0	0	0	0	0	0	0	0	0	0	0	0	0	0	0	0	0	0	0	0	0	0	0	0	0	0	0	0
36b357371047f5da60f3053ba29e9aed	0	0	0	0	28	0	0	0	0	0	0	0	0	0	13	0	0	0	0	0	0	0	0	0	0	0	0	0	0	0	0	0	0	0	0	0	0
2e5d768b167f03e42b8f20158865838c	0	0	0	0	0	0	0	0	0	0	0	0	0	0	41	0	0	0	0	0	0	0	0	0	0	0	0	0	0	0	0	0	0	0	0	0	0
24a8ddb894c6c1ed3d078fe6e25800c3	0	0	0	0	0	0	0	0	0	0	0	0	0	0	0	0	0	0	0	0	0	0	0	0	41	0	0	0	0	0	0	0	0	0	0	0	0
215a52066991eeef9ca2e5042e05ae82	41	0	0	0	0	0	0	0	0	0	0	0	0	0	0	0	0	0	0	0	0	0	0	0	0	0	0	0	0	0	0	0	0	0	0	0	0
056bd822bfec6e22f96fd1823bc6801c	0	0	0	0	0	0	0	0	41	0	0	0	0	0	0	0	0	0	0	0	0	0	0	0	0	0	0	0	0	0	0	0	0	0	0	0	0
ed8615b4fd009ce45d0ca7cfcd087ce9	0	0	0	0	0	0	0	0	0	0	40	0	0	0	0	0	0	0	0	0	0	0	0	0	0	0	0	0	0	0	0	0	0	0	0	0	0
dd614c94d9a4e1b1a9ecbce254351241	0	0	0	7	0	0	0	8	7	2	0	0	0	0	0	0	0	0	0	0	5	3	2	0	0	0	0	0	0	0	0	0	6	0	0	0	0
bf58588a482e08268ff7bcea03978093	0	0	0	0	40	0	0	0	0	0	0	0	0	0	0	0	0	0	0	0	0	0	0	0	0	0	0	0	0	0	0	0	0	0	0	0	0
af8a32d0dcbc37ae26023261215d3ed4	0	0	0	0	0	0	0	0	0	0	0	0	0	0	0	0	0	0	0	0	0	0	0	0	0	0	0	0	0	0	0	0	40	0	0	0	0
9fe90447adb697106eb2b31b927c7e33	6	0	0	0	0	0	0	0	0	34	0	0	0	0	0	0	0	0	0	0	0	0	0	0	0	0	0	0	0	0	0	0	0	0	0	0	0
954ca5f3cbc5ac09f1d12db06f58b9c8	0	0	0	0	0	0	0	0	31	0	0	0	0	0	0	0	0	0	0	0	0	0	0	0	0	0	0	0	0	0	0	9	0	0	0	0	0
9001029a1cdae6853f132b76fac7aa3c	8	0	12	0	0	0	0	0	0	0	0	0	0	0	0	20	0	0	0	0	0	0	0	0	0	0	0	0	0	0	0	0	0	0	0	0	0
850390475c9e8f5c5fddfacdc4b1368e	0	0	0	0	0	0	0	0	0	0	0	0	0	0	0	0	0	0	40	0	0	0	0	0	0	0	0	0	0	0	0	0	0	0	0	0	0
4845014269afa690364ab3903e38e5c7	0	40	0	0	0	0	0	0	0	0	0	0	0	0	0	0	0	0	0	0	0	0	0	0	0	0	0	0	0	0	0	0	0	0	0	0	0
38fb746dd7df31bc8154b4877b347e6b	0	0	0	0	0	0	0	0	40	0	0	0	0	0	0	0	0	0	0	0	0	0	0	0	0	0	0	0	0	0	0	0	0	0	0	0	0
13469ae38c25ca60c415937020e01686	0	0	0	6	0	0	0	30	0	0	0	0	0	0	0	0	0	0	0	0	0	0	0	0	0	0	4	0	0	0	0	0	0	0	0	0	0
c40b4a9999bde9ed2fd30062f26d4d9a	0	0	0	0	0	0	0	0	0	0	0	0	0	0	0	0	0	0	0	0	0	0	0	0	0	0	0	31	0	0	5	0	0	3	0	0	0
bd47bb0bc9c77f944dd7fea52267f9b1	0	0	0	0	0	0	0	0	0	0	0	0	0	0	0	0	0	0	0	0	0	0	0	0	0	0	39	0	0	0	0	0	0	0	0	0	0
bcfe00188f757e4f800eb9a47c1b1747	0	0	0	0	0	3	0	0	5	0	0	4	0	0	4	0	0	5	0	0	0	4	0	9	0	0	0	2	0	0	3	0	0	0	0	0	0
bc80c58b7985b2c697eb220c2e3cb91b	0	0	0	0	0	0	0	0	0	39	0	0	0	0	0	0	0	0	0	0	0	0	0	0	0	0	0	0	0	0	0	0	0	0	0	0	0
ad57bacd44648869d9c4bb00e863c19e	0	0	0	0	0	0	0	0	0	0	0	0	0	0	0	0	0	0	0	0	0	0	0	0	39	0	0	0	0	0	0	0	0	0	0	0	0
aaa3c4c2cb363b214ebe98760a94d56f	0	0	0	0	0	0	0	0	0	0	0	0	0	39	0	0	0	0	0	0	0	0	0	0	0	0	0	0	0	0	0	0	0	0	0	0	0
9e8d09a520f4c2afa58f1bc02f492f81	0	39	0	0	0	0	0	0	0	0	0	0	0	0	0	0	0	0	0	0	0	0	0	0	0	0	0	0	0	0	0	0	0	0	0	0	0
98f177d96b51cb06031e3d80b2916595	0	0	0	0	0	0	0	0	0	39	0	0	0	0	0	0	0	0	0	0	0	0	0	0	0	0	0	0	0	0	0	0	0	0	0	0	0
9853b7d05a849706ed61326c500299ac	0	0	0	0	0	0	0	39	0	0	0	0	0	0	0	0	0	0	0	0	0	0	0	0	0	0	0	0	0	0	0	0	0	0	0	0	0
93ebf3daf3d45d791574d9e303002342	0	0	0	0	0	0	0	0	0	0	0	0	0	0	39	0	0	0	0	0	0	0	0	0	0	0	0	0	0	0	0	0	0	0	0	0	0
8be449490a4877d30785e30a483fb586	0	0	0	0	0	0	0	0	0	0	0	0	0	0	0	0	22	0	0	0	0	0	0	0	0	0	0	0	0	0	0	0	0	0	17	0	0
8621c1186edbbb214e8e83c694a3b605	0	0	0	0	0	0	0	0	0	0	0	39	0	0	0	0	0	0	0	0	0	0	0	0	0	0	0	0	0	0	0	0	0	0	0	0	0
7e4efe610fbfcae9dee0c022a3fc2c9d	0	0	0	0	0	0	0	0	0	39	0	0	0	0	0	0	0	0	0	0	0	0	0	0	0	0	0	0	0	0	0	0	0	0	0	0	0
7cc6367f48e46657662b2889c1632c1a	0	0	0	0	0	0	0	0	0	39	0	0	0	0	0	0	0	0	0	0	0	0	0	0	0	0	0	0	0	0	0	0	0	0	0	0	0
72b6a84de3489df207113c2f72397c83	0	0	0	0	0	0	0	0	0	0	0	0	0	0	0	0	0	0	0	0	0	0	0	0	0	0	0	0	0	0	0	0	0	0	0	39	0
628a8271df863e2ec602d8283fc5a281	0	0	0	0	0	0	0	0	0	0	0	0	0	0	0	39	0	0	0	0	0	0	0	0	0	0	0	0	0	0	0	0	0	0	0	0	0
341aaf437940dd192a1f2feb97ecebb1	0	0	0	0	0	0	0	0	0	0	0	0	0	0	0	0	0	0	0	0	0	0	0	0	39	0	0	0	0	0	0	0	0	0	0	0	0
2ff696efb7ed54635eb22b0bc25f412f	39	0	0	0	0	0	0	0	0	0	0	0	0	0	0	0	0	0	0	0	0	0	0	0	0	0	0	0	0	0	0	0	0	0	0	0	0
29186be62242d9316a5618b5fbd9a36c	0	0	0	5	34	0	0	0	0	0	0	0	0	0	0	0	0	0	0	0	0	0	0	0	0	0	0	0	0	0	0	0	0	0	0	0	0
f6e3cbeec63635d7a0c578fa65659de9	0	38	0	0	0	0	0	0	0	0	0	0	0	0	0	0	0	0	0	0	0	0	0	0	0	0	0	0	0	0	0	0	0	0	0	0	0
eb5290973d1bf9dc702cac42f8a2c5ed	0	0	0	0	0	0	0	0	0	18	0	0	0	0	0	0	0	0	0	0	0	0	0	0	0	0	0	0	0	0	0	0	0	0	0	0	20
ead362718b89c04c71e3788fa92a51f4	0	0	0	0	0	0	0	0	0	24	0	14	0	0	0	0	0	0	0	0	0	0	0	0	0	0	0	0	0	0	0	0	0	0	0	0	0
e37fd60ea7f3553f8a8e46b287f60780	0	0	0	0	0	0	0	0	0	38	0	0	0	0	0	0	0	0	0	0	0	0	0	0	0	0	0	0	0	0	0	0	0	0	0	0	0
dd0e5b5928077984d17ccad648c1a9c3	0	0	0	0	38	0	0	0	0	0	0	0	0	0	0	0	0	0	0	0	0	0	0	0	0	0	0	0	0	0	0	0	0	0	0	0	0
dcb9c58db5cc85c215013b709f2a7e3f	0	0	0	0	0	0	0	0	0	0	0	38	0	0	0	0	0	0	0	0	0	0	0	0	0	0	0	0	0	0	0	0	0	0	0	0	0
bb52615cb210647c47960514f6dc247b	0	0	0	0	0	0	0	0	0	0	0	0	0	0	0	0	0	0	0	0	0	0	0	0	38	0	0	0	0	0	0	0	0	0	0	0	0
b313127fee1ff75e9eb77852ced3ba43	0	0	0	0	0	0	0	0	0	38	0	0	0	0	0	0	0	0	0	0	0	0	0	0	0	0	0	0	0	0	0	0	0	0	0	0	0
af65bacba1d211a83e03c434f954352a	0	0	0	0	0	0	0	0	0	0	0	0	0	0	0	0	36	0	0	0	0	0	0	0	0	0	0	0	0	2	0	0	0	0	0	0	0
9451661d03b7e0de007893ddd9483ae5	0	0	0	0	0	0	0	0	0	38	0	0	0	0	0	0	0	0	0	0	0	0	0	0	0	0	0	0	0	0	0	0	0	0	0	0	0
84c7e85fa821a7cdb7b13b202cc39c9d	0	0	0	0	0	0	0	0	0	0	0	0	0	0	0	0	0	0	0	0	0	0	0	0	0	0	0	11	0	0	15	0	0	0	0	0	12
78b76324c9a1957bdccc36c5638d5210	0	0	0	0	0	0	0	0	0	0	0	0	0	0	0	0	0	0	0	0	0	0	0	0	38	0	0	0	0	0	0	0	0	0	0	0	0
72271968727ff1bcc1e2a9bdb9f68776	0	0	0	0	0	0	0	0	7	0	0	0	0	0	10	0	0	0	0	0	0	0	0	0	0	0	21	0	0	0	0	0	0	0	0	0	0
6910e55939f5738fd93ab31066e68853	0	0	0	0	0	0	0	0	0	0	0	0	0	0	0	0	0	0	0	0	0	0	0	0	0	0	0	0	0	0	0	0	38	0	0	0	0
5c93a403e7aac015c28756027af6ce21	0	0	0	38	0	0	0	0	0	0	0	0	0	0	0	0	0	0	0	0	0	0	0	0	0	0	0	0	0	0	0	0	0	0	0	0	0
5905010f6d47a41d796365de0b5b27f7	0	27	0	0	0	0	0	0	0	0	0	0	0	0	0	0	0	0	0	0	0	0	0	0	0	0	0	0	0	0	0	0	0	0	11	0	0
4ec5245f0cf914eab413b795d1a9d7b2	0	0	0	0	0	0	0	0	0	5	0	0	0	0	0	33	0	0	0	0	0	0	0	0	0	0	0	0	0	0	0	0	0	0	0	0	0
47ba5c0168adc06bee459e836666b3f1	0	0	0	0	0	0	0	0	0	0	0	0	0	0	0	0	0	0	0	0	0	0	0	38	0	0	0	0	0	0	0	0	0	0	0	0	0
2f003a2e555d6d0fc9cbdf68acb35355	0	38	0	0	0	0	0	0	0	0	0	0	0	0	0	0	0	0	0	0	0	0	0	0	0	0	0	0	0	0	0	0	0	0	0	0	0
e46971f67e0b013864a2623067e09094	0	0	0	0	31	0	0	0	0	0	0	0	0	0	0	0	0	0	0	0	0	0	0	0	0	0	6	0	0	0	0	0	0	0	0	0	0
cee25e6a8da2c1dc599e73698085f395	0	0	0	0	0	0	0	0	0	0	0	0	0	5	0	0	0	0	0	0	0	0	0	0	0	0	0	0	0	0	0	0	0	0	32	0	0
c27984543bf5a371e5e78353c106aacc	0	0	0	0	0	0	0	9	0	0	0	0	0	0	28	0	0	0	0	0	0	0	0	0	0	0	0	0	0	0	0	0	0	0	0	0	0
b1819b9d1acbd52d35e8b4104623db93	0	0	0	0	0	0	0	0	0	0	0	0	0	0	0	0	0	0	0	0	0	0	0	0	0	0	0	0	0	0	37	0	0	0	0	0	0
aebc5e68565f2bbe4e948baa2a9f5702	0	0	0	0	0	0	0	0	0	37	0	0	0	0	0	0	0	0	0	0	0	0	0	0	0	0	0	0	0	0	0	0	0	0	0	0	0
a7b39d73b580db36fa71b5acff6b2aa5	0	0	0	0	0	0	0	0	0	0	0	0	0	0	0	0	0	0	0	0	0	0	0	0	0	0	0	0	0	0	0	37	0	0	0	0	0
a6e2fbddf4a4688093ef13cb3484c5c5	0	0	0	0	0	0	0	0	0	37	0	0	0	0	0	0	0	0	0	0	0	0	0	0	0	0	0	0	0	0	0	0	0	0	0	0	0
a01e6ad1d4ce5d5869d6ac68a208dd97	0	0	0	0	0	0	0	0	0	0	37	0	0	0	0	0	0	0	0	0	0	0	0	0	0	0	0	0	0	0	0	0	0	0	0	0	0
7526f36c75023f0ffb312b6138b7553f	37	0	0	0	0	0	0	0	0	0	0	0	0	0	0	0	0	0	0	0	0	0	0	0	0	0	0	0	0	0	0	0	0	0	0	0	0
5bb4338b3a6b354f5c3e1426ff31e8c7	0	0	0	0	0	0	0	0	0	0	0	0	0	0	0	0	0	37	0	0	0	0	0	0	0	0	0	0	0	0	0	0	0	0	0	0	0
546f2e38a7a4313feabcf9098847b08a	0	0	0	0	0	0	0	0	0	0	0	0	0	0	0	0	0	37	0	0	0	0	0	0	0	0	0	0	0	0	0	0	0	0	0	0	0
4bfbed228b4b06561dd58b01519fdbaa	0	0	7	0	0	0	0	0	0	0	0	0	0	0	0	0	0	0	0	11	0	0	8	4	0	7	0	0	0	0	0	0	0	0	0	0	0
46ad2dac3aaaddc4304f27e302b6d1ab	0	0	0	0	0	0	0	22	0	0	0	0	0	0	15	0	0	0	0	0	0	0	0	0	0	0	0	0	0	0	0	0	0	0	0	0	0
3c842bef107ed416c98a01c8dca59dfb	0	0	0	2	6	0	4	6	0	2	3	0	0	0	3	0	0	0	0	0	0	2	0	0	4	0	0	0	0	0	0	2	0	0	0	3	0
2698c05742e48a0a2d8db920468d3d97	0	0	0	0	0	0	0	0	0	0	0	0	0	0	0	0	0	0	0	0	0	0	0	0	37	0	0	0	0	0	0	0	0	0	0	0	0
22800616cf4779181253d543bfde9222	0	0	0	0	0	0	0	0	0	37	0	0	0	0	0	0	0	0	0	0	0	0	0	0	0	0	0	0	0	0	0	0	0	0	0	0	0
221dcb496b7e3dc4b6140e36a18fb858	0	0	0	0	0	0	0	0	0	0	0	0	0	0	0	0	0	0	0	0	0	0	0	37	0	0	0	0	0	0	0	0	0	0	0	0	0
1efe65fc09aec53f3e8e1052328da51e	0	0	0	0	0	0	0	0	0	37	0	0	0	0	0	0	0	0	0	0	0	0	0	0	0	0	0	0	0	0	0	0	0	0	0	0	0
13931ee16d49632c523b39dbc3b28093	0	0	0	0	0	0	37	0	0	0	0	0	0	0	0	0	0	0	0	0	0	0	0	0	0	0	0	0	0	0	0	0	0	0	0	0	0
03eddcd6fef09c0ad1b02e6e42feb73c	0	0	0	0	0	0	0	32	0	0	0	0	0	0	0	0	0	0	0	0	0	0	0	0	0	0	5	0	0	0	0	0	0	0	0	0	0
03a12eb125697c8a20b1091425a238d6	0	0	0	0	0	0	0	0	0	0	0	0	0	0	0	0	0	0	0	0	0	0	0	0	0	0	0	0	0	0	0	0	0	0	0	0	37
eefde94e8aae31f786fffcc997fc1ac9	0	0	0	4	0	0	9	10	3	0	0	0	0	0	0	0	0	4	0	0	0	0	0	0	0	0	0	0	0	0	0	6	0	0	0	0	0
e9cd3de7c09071affb25a3cf84683c4f	36	0	0	0	0	0	0	0	0	0	0	0	0	0	0	0	0	0	0	0	0	0	0	0	0	0	0	0	0	0	0	0	0	0	0	0	0
e80cc98c7c74f30814fd95aa73d0b685	0	0	0	36	0	0	0	0	0	0	0	0	0	0	0	0	0	0	0	0	0	0	0	0	0	0	0	0	0	0	0	0	0	0	0	0	0
e15f568598bbc307237b15259fee6e4c	0	0	0	0	0	0	0	0	0	0	0	0	0	0	0	0	36	0	0	0	0	0	0	0	0	0	0	0	0	0	0	0	0	0	0	0	0
d6641ad8d500a04f01211a70263ad1f7	0	0	0	0	0	0	0	0	0	0	0	0	0	0	0	0	0	0	0	0	0	0	0	0	36	0	0	0	0	0	0	0	0	0	0	0	0
be141f8d3d76b8c2b6783fcd8a6909bf	0	0	0	0	0	0	0	33	0	0	0	0	0	0	0	0	0	0	0	0	3	0	0	0	0	0	0	0	0	0	0	0	0	0	0	0	0
a5cc85286e7bb2ed68cf865d9c8bfd15	0	0	0	0	0	0	0	0	0	0	36	0	0	0	0	0	0	0	0	0	0	0	0	0	0	0	0	0	0	0	0	0	0	0	0	0	0
9017a32c55163971f70ddc07d8e278b8	0	0	0	0	0	0	0	36	0	0	0	0	0	0	0	0	0	0	0	0	0	0	0	0	0	0	0	0	0	0	0	0	0	0	0	0	0
8fa5d0de59830fe5f532d01eb86fdddf	0	0	0	0	0	0	0	36	0	0	0	0	0	0	0	0	0	0	0	0	0	0	0	0	0	0	0	0	0	0	0	0	0	0	0	0	0
85aeff996c5bc01b2e1e23a932811bc2	31	0	3	0	0	0	0	2	0	0	0	0	0	0	0	0	0	0	0	0	0	0	0	0	0	0	0	0	0	0	0	0	0	0	0	0	0
55916a0b2e32d7920117e029b2f847b8	0	0	0	0	0	0	0	0	0	0	0	0	0	0	0	0	0	0	0	0	0	0	0	0	0	0	0	0	0	0	32	0	0	4	0	0	0
50d6c8ea2b64316a3c5e66bb2a9056c6	0	0	0	0	0	0	0	0	0	36	0	0	0	0	0	0	0	0	0	0	0	0	0	0	0	0	0	0	0	0	0	0	0	0	0	0	0
4484504467ab62c515f6731316ae1efe	0	0	0	0	0	0	0	0	0	17	0	0	0	0	0	0	0	0	0	0	0	4	0	0	0	0	0	0	0	0	0	0	15	0	0	0	0
2966af6f42961f151e9c4a9e04a34e9e	0	6	0	0	0	0	0	0	0	0	0	0	0	0	0	0	0	0	0	0	0	0	0	0	30	0	0	0	0	0	0	0	0	0	0	0	0
19cd5ceb268ec10d8a27c3d02f49de5b	0	0	0	0	0	0	0	0	0	0	0	0	0	0	0	0	0	0	0	0	0	0	0	0	36	0	0	0	0	0	0	0	0	0	0	0	0
16ac5925f32d1b486f4fccd4211bc532	0	0	0	0	0	0	0	0	0	0	0	0	0	0	0	0	0	0	0	0	0	36	0	0	0	0	0	0	0	0	0	0	0	0	0	0	0
ff7ff7b7d97ef375cbd029ca6581c167	0	0	0	13	0	0	0	0	0	0	0	0	0	0	0	0	0	0	0	0	0	0	0	0	0	0	22	0	0	0	0	0	0	0	0	0	0
e85dfad571139a04833ed7d6e0b944ab	0	0	0	0	0	0	0	0	0	35	0	0	0	0	0	0	0	0	0	0	0	0	0	0	0	0	0	0	0	0	0	0	0	0	0	0	0
d080b2a9222fe00b5ff7af0f811055e5	0	0	0	0	0	0	0	0	0	35	0	0	0	0	0	0	0	0	0	0	0	0	0	0	0	0	0	0	0	0	0	0	0	0	0	0	0
cb9f4c7c9353a5f0bc8f788b813fb890	0	0	0	21	0	0	0	0	0	0	0	0	0	0	0	3	11	0	0	0	0	0	0	0	0	0	0	0	0	0	0	0	0	0	0	0	0
ca2045161c4ef591e802f2a28edfbbca	0	0	0	0	0	0	0	0	0	35	0	0	0	0	0	0	0	0	0	0	0	0	0	0	0	0	0	0	0	0	0	0	0	0	0	0	0
be9e7e2786b3ae134712e7b6bedc2259	0	0	0	0	0	0	16	0	0	0	0	6	0	0	0	0	0	0	0	0	0	13	0	0	0	0	0	0	0	0	0	0	0	0	0	0	0
b1f03eeb733492648aaf42efb7702d64	0	0	0	0	0	0	0	0	0	0	0	0	0	0	0	0	0	8	0	0	8	0	0	0	0	0	0	8	0	0	0	7	0	0	4	0	0
a5936aaffde8ebe1780da5a8fdbe5750	0	0	0	0	0	0	0	0	35	0	0	0	0	0	0	0	0	0	0	0	0	0	0	0	0	0	0	0	0	0	0	0	0	0	0	0	0
a2e9678f7d3c84a042bcc7d359ba6e2f	0	0	0	0	0	0	0	0	0	0	0	0	0	0	0	0	0	0	0	0	0	0	0	0	0	35	0	0	0	0	0	0	0	0	0	0	0
a2cb6daebbab686ff5473dafab770f14	0	0	0	0	0	0	0	0	0	35	0	0	0	0	0	0	0	0	0	0	0	0	0	0	0	0	0	0	0	0	0	0	0	0	0	0	0
8738ab6328225bf94311ed0bf96c32f3	0	0	0	0	0	0	0	0	35	0	0	0	0	0	0	0	0	0	0	0	0	0	0	0	0	0	0	0	0	0	0	0	0	0	0	0	0
6a122e006a4a2743a20098877fbab1bb	0	0	0	0	0	0	0	0	0	0	0	0	0	0	0	0	0	0	0	0	0	0	0	0	0	35	0	0	0	0	0	0	0	0	0	0	0
612711092be5ac85baaade0af0b70bb5	0	2	0	0	0	0	0	27	0	0	0	3	3	0	0	0	0	0	0	0	0	0	0	0	0	0	0	0	0	0	0	0	0	0	0	0	0
4a0352be7612bae0d8bf5ad6815df4b2	35	0	0	0	0	0	0	0	0	0	0	0	0	0	0	0	0	0	0	0	0	0	0	0	0	0	0	0	0	0	0	0	0	0	0	0	0
37b221a3cf8b0e6e834e1059df9c3016	0	0	0	0	0	0	0	0	0	0	0	0	0	0	0	0	0	0	0	0	0	0	0	35	0	0	0	0	0	0	0	0	0	0	0	0	0
35791f882ef8d2b3177ac86ac87889b7	21	0	0	0	0	0	0	0	0	0	0	0	0	8	0	0	0	0	0	0	0	0	0	0	0	0	0	0	0	6	0	0	0	0	0	0	0
31beb23d8179471c61808e97e78f18ec	0	0	0	0	0	0	0	0	0	0	0	0	0	0	0	0	0	0	0	0	0	0	0	0	35	0	0	0	0	0	0	0	0	0	0	0	0
28f6725fd27d82c88d036b99af9e7351	0	0	0	0	0	0	0	35	0	0	0	0	0	0	0	0	0	0	0	0	0	0	0	0	0	0	0	0	0	0	0	0	0	0	0	0	0
1e9f51af17a4447f7530b5242df4cf1f	0	0	0	0	0	0	0	35	0	0	0	0	0	0	0	0	0	0	0	0	0	0	0	0	0	0	0	0	0	0	0	0	0	0	0	0	0
1e370efe7396f796a97e7024129b775a	0	0	0	0	0	0	0	0	0	0	0	0	0	0	0	0	0	35	0	0	0	0	0	0	0	0	0	0	0	0	0	0	0	0	0	0	0
12af21e39886564413f6f2071429c98b	0	0	0	0	0	0	0	0	0	0	0	0	0	35	0	0	0	0	0	0	0	0	0	0	0	0	0	0	0	0	0	0	0	0	0	0	0
0ffba2a4a67e6140fa5f7f0d18c12a6c	0	35	0	0	0	0	0	0	0	0	0	0	0	0	0	0	0	0	0	0	0	0	0	0	0	0	0	0	0	0	0	0	0	0	0	0	0
0fef20fc2663c40cdcc3c1dd544218a5	35	0	0	0	0	0	0	0	0	0	0	0	0	0	0	0	0	0	0	0	0	0	0	0	0	0	0	0	0	0	0	0	0	0	0	0	0
e23ec13d4d017c392aca6a7c11545db2	0	0	0	0	0	0	0	0	0	34	0	0	0	0	0	0	0	0	0	0	0	0	0	0	0	0	0	0	0	0	0	0	0	0	0	0	0
da8cd1ac30226e9985408b9b77bffa50	0	0	0	0	0	0	0	0	0	34	0	0	0	0	0	0	0	0	0	0	0	0	0	0	0	0	0	0	0	0	0	0	0	0	0	0	0
b6d861806561b5713a1f52ca683be7fe	0	32	0	0	0	0	0	0	0	0	0	0	0	0	0	0	0	0	0	0	0	2	0	0	0	0	0	0	0	0	0	0	0	0	0	0	0
a9261fc5d7c77f5ceaf817a320f9270a	0	0	0	34	0	0	0	0	0	0	0	0	0	0	0	0	0	0	0	0	0	0	0	0	0	0	0	0	0	0	0	0	0	0	0	0	0
a604ae8271d8837da71946da8dd2df69	0	0	0	0	0	0	0	0	0	0	0	0	0	0	0	0	0	0	0	0	0	0	0	0	0	0	0	0	0	34	0	0	0	0	0	0	0
a5484685b1136a5f4cffe68fbc6340de	0	0	0	0	25	0	0	0	0	0	0	0	0	0	9	0	0	0	0	0	0	0	0	0	0	0	0	0	0	0	0	0	0	0	0	0	0
9b66b994fafc59016a7a8d15a68ea95e	0	0	0	0	0	0	0	0	0	0	0	0	0	0	0	0	0	0	0	0	0	0	0	0	0	0	0	0	0	34	0	0	0	0	0	0	0
95725aeb93fa6385478ff41de483fc50	0	0	0	0	0	0	0	0	31	0	0	0	0	3	0	0	0	0	0	0	0	0	0	0	0	0	0	0	0	0	0	0	0	0	0	0	0
9497cb352d70fcf3480a3434981ed77b	0	0	0	0	0	0	0	0	0	34	0	0	0	0	0	0	0	0	0	0	0	0	0	0	0	0	0	0	0	0	0	0	0	0	0	0	0
8e65e0fda02246f6a23698e0c5ad3f4c	0	0	0	0	34	0	0	0	0	0	0	0	0	0	0	0	0	0	0	0	0	0	0	0	0	0	0	0	0	0	0	0	0	0	0	0	0
8a5f0f6a2b67ce1efaf8940684074156	0	0	0	0	34	0	0	0	0	0	0	0	0	0	0	0	0	0	0	0	0	0	0	0	0	0	0	0	0	0	0	0	0	0	0	0	0
89fa9e8df01a2c88e7c8762cbad969c0	0	0	0	0	0	0	0	0	0	0	0	13	0	0	0	0	0	0	0	0	0	0	0	0	0	0	0	0	0	21	0	0	0	0	0	0	0
89f5d02b67414f96c0e7e5d1e4861a79	0	0	0	0	0	0	0	0	0	0	0	0	0	0	0	0	0	0	0	0	0	0	0	0	0	34	0	0	0	0	0	0	0	0	0	0	0
89bc6bbc8a3a0e323e6b04fed02be42c	0	0	0	0	0	0	0	0	0	0	0	0	0	0	0	0	0	0	0	0	0	0	0	34	0	0	0	0	0	0	0	0	0	0	0	0	0
7e73e94534b4d32faca3e715db11390e	0	0	0	34	0	0	0	0	0	0	0	0	0	0	0	0	0	0	0	0	0	0	0	0	0	0	0	0	0	0	0	0	0	0	0	0	0
6bf385087e72dd28f82fb08b053e00e9	0	0	0	0	0	0	0	0	0	34	0	0	0	0	0	0	0	0	0	0	0	0	0	0	0	0	0	0	0	0	0	0	0	0	0	0	0
5b7054410ac1af175be6f81c9243f73d	0	6	0	0	0	0	0	0	0	0	0	0	0	0	0	0	0	0	0	0	0	0	0	0	0	0	0	0	0	0	0	0	0	0	28	0	0
547a5e98fe8c207681799660377679ea	0	0	0	0	0	0	0	0	0	34	0	0	0	0	0	0	0	0	0	0	0	0	0	0	0	0	0	0	0	0	0	0	0	0	0	0	0
4e9760b91400063d2f8887900277c89a	0	34	0	0	0	0	0	0	0	0	0	0	0	0	0	0	0	0	0	0	0	0	0	0	0	0	0	0	0	0	0	0	0	0	0	0	0
452de140cf724ff670dd2d7547ef75cf	0	0	0	0	0	0	0	0	34	0	0	0	0	0	0	0	0	0	0	0	0	0	0	0	0	0	0	0	0	0	0	0	0	0	0	0	0
40fefa39927c5cb109bd53f371ac356f	0	0	0	0	0	0	0	0	0	32	0	0	0	0	0	0	0	0	0	0	0	0	0	0	0	0	0	0	0	0	0	0	0	0	0	2	0
32f47b229df2c632f04c7536d4c462b3	0	0	0	10	0	0	5	0	0	0	0	0	0	7	0	0	0	0	0	0	0	0	0	0	0	12	0	0	0	0	0	0	0	0	0	0	0
28268fd92f3a62fab56ff3d2e50726b2	0	0	0	0	0	0	0	0	0	0	0	0	0	0	0	0	0	34	0	0	0	0	0	0	0	0	0	0	0	0	0	0	0	0	0	0	0
16cb94ce28def7ff88fcabef209e124a	0	0	0	0	0	0	0	34	0	0	0	0	0	0	0	0	0	0	0	0	0	0	0	0	0	0	0	0	0	0	0	0	0	0	0	0	0
0cb49e1331fdb6f8e7ffb7236eb1b3bd	0	0	0	0	0	0	0	0	0	0	0	0	0	0	0	0	0	0	0	0	0	0	0	0	0	0	0	0	0	0	0	0	0	0	0	34	0
f35a183b1f1604746195d8442c4b245f	0	0	0	0	0	0	0	0	0	33	0	0	0	0	0	0	0	0	0	0	0	0	0	0	0	0	0	0	0	0	0	0	0	0	0	0	0
e83e879b0fccdf52c4a6522b4ecf0dc8	0	0	0	0	0	0	0	0	0	33	0	0	0	0	0	0	0	0	0	0	0	0	0	0	0	0	0	0	0	0	0	0	0	0	0	0	0
cbf6a3950d97858b4a218a1f53cd499d	0	0	0	0	0	0	0	0	0	0	0	0	0	0	0	33	0	0	0	0	0	0	0	0	0	0	0	0	0	0	0	0	0	0	0	0	0
b70ea05bf1aa23ecd4ddc71262ef6046	0	0	0	33	0	0	0	0	0	0	0	0	0	0	0	0	0	0	0	0	0	0	0	0	0	0	0	0	0	0	0	0	0	0	0	0	0
b10e19c81287a752379766d941f39323	0	0	0	0	0	0	0	0	0	0	0	0	0	0	0	0	0	0	0	0	0	0	0	0	33	0	0	0	0	0	0	0	0	0	0	0	0
aa48bcaeab2f5da0c90a47745de64385	0	0	0	0	0	0	0	0	0	0	0	0	0	33	0	0	0	0	0	0	0	0	0	0	0	0	0	0	0	0	0	0	0	0	0	0	0
99a30d2e520c0bb462c9d36594b679ef	0	0	0	0	0	0	0	33	0	0	0	0	0	0	0	0	0	0	0	0	0	0	0	0	0	0	0	0	0	0	0	0	0	0	0	0	0
9478de4ff4e784e8c9ea211a587d4abc	0	0	0	0	0	0	0	0	0	33	0	0	0	0	0	0	0	0	0	0	0	0	0	0	0	0	0	0	0	0	0	0	0	0	0	0	0
9130c42f6b0aee2ec670fdcc2ad22f43	0	0	0	0	0	0	0	0	33	0	0	0	0	0	0	0	0	0	0	0	0	0	0	0	0	0	0	0	0	0	0	0	0	0	0	0	0
880eaa86b0668c0d5d526abcd5e90e37	0	0	0	0	15	0	0	0	0	0	0	0	0	0	0	8	0	5	0	0	0	0	0	0	0	0	5	0	0	0	0	0	0	0	0	0	0
865e1bf22a639ebca4724a0860b4acb1	0	0	0	0	0	0	0	0	0	0	0	0	0	0	0	0	0	0	0	0	0	0	0	28	5	0	0	0	0	0	0	0	0	0	0	0	0
77de81d8113df7496ff669f969df971c	0	0	0	0	0	0	0	0	0	0	0	0	0	0	0	0	0	0	0	0	0	0	0	0	33	0	0	0	0	0	0	0	0	0	0	0	0
778b87f65344c916e88e7c4a20071d21	17	0	0	0	0	0	0	0	0	0	0	0	0	16	0	0	0	0	0	0	0	0	0	0	0	0	0	0	0	0	0	0	0	0	0	0	0
6cc6d7abe648c4c41106e5960f14b385	0	33	0	0	0	0	0	0	0	0	0	0	0	0	0	0	0	0	0	0	0	0	0	0	0	0	0	0	0	0	0	0	0	0	0	0	0
5472d4c27c3cac3b9b059bc492e8d80c	0	0	0	0	0	0	0	0	0	0	0	0	0	0	33	0	0	0	0	0	0	0	0	0	0	0	0	0	0	0	0	0	0	0	0	0	0
49c37bc2464ade5b81afcd9afdcc61c3	0	0	0	0	0	0	0	0	0	33	0	0	0	0	0	0	0	0	0	0	0	0	0	0	0	0	0	0	0	0	0	0	0	0	0	0	0
3f45da630b64502254e758ff1dd957fe	0	14	0	0	0	0	0	0	0	0	0	0	0	0	0	0	0	0	0	0	0	0	0	0	19	0	0	0	0	0	0	0	0	0	0	0	0
3ad2ae7106a971d3f7a4141aa15b6874	0	0	0	0	0	0	0	0	0	33	0	0	0	0	0	0	0	0	0	0	0	0	0	0	0	0	0	0	0	0	0	0	0	0	0	0	0
2c2de32bcfa3bab7ae26b71536813553	0	0	0	0	0	0	0	0	0	0	0	8	0	0	7	0	0	0	0	7	0	0	0	0	11	0	0	0	0	0	0	0	0	0	0	0	0
1f81f9d2061057ecc701f09687b1afa2	0	0	0	0	0	0	0	0	0	0	0	0	0	33	0	0	0	0	0	0	0	0	0	0	0	0	0	0	0	0	0	0	0	0	0	0	0
0c5b888faf42af29de8e7b46686f8078	0	33	0	0	0	0	0	0	0	0	0	0	0	0	0	0	0	0	0	0	0	0	0	0	0	0	0	0	0	0	0	0	0	0	0	0	0
f1cbb4bf26ea5f0cb007639b41bf71bd	0	0	0	0	0	0	0	0	0	23	0	0	0	0	0	0	0	0	0	0	0	0	0	0	0	0	0	9	0	0	0	0	0	0	0	0	0
ef252f6519cb4c0485be2ee08b662613	0	0	0	0	0	0	0	0	0	0	32	0	0	0	0	0	0	0	0	0	0	0	0	0	0	0	0	0	0	0	0	0	0	0	0	0	0
e467e9be5b5320ae87052fc26e26101e	0	2	0	0	0	0	0	0	0	0	0	0	0	0	0	0	0	0	0	0	0	0	0	0	0	0	30	0	0	0	0	0	0	0	0	0	0
d9a76da35c5a8b575193a28c93710de9	0	0	0	0	0	0	0	0	0	0	0	0	0	0	0	0	0	0	0	0	0	0	0	0	0	0	0	0	0	0	32	0	0	0	0	0	0
d61777934bc8358715a2f5b889514957	0	0	0	0	0	0	0	0	0	32	0	0	0	0	0	0	0	0	0	0	0	0	0	0	0	0	0	0	0	0	0	0	0	0	0	0	0
c14448bf6882365e4520bf494d70b490	0	0	0	0	0	0	0	0	0	0	0	0	0	0	0	0	0	0	0	0	0	0	0	0	0	0	0	0	0	0	32	0	0	0	0	0	0
b980f5fc48c5e9fefd17711be66753e1	0	0	0	0	0	0	0	0	0	0	0	0	0	4	0	0	0	0	0	0	0	0	0	0	19	0	0	0	0	0	9	0	0	0	0	0	0
b5e22489329d2d66c1e02a765ff66623	0	0	0	0	0	0	0	0	0	32	0	0	0	0	0	0	0	0	0	0	0	0	0	0	0	0	0	0	0	0	0	0	0	0	0	0	0
b562fb82993b72c99a935019986c7ad4	0	0	0	0	0	0	0	0	0	0	0	0	0	0	0	0	0	0	0	0	0	0	0	0	0	0	0	4	0	0	0	0	0	28	0	0	0
b37c94df79eb0fd3a8e7400552ac952f	0	0	0	0	0	0	0	0	11	0	0	0	0	0	0	0	0	0	0	4	0	0	0	0	0	0	9	0	0	0	0	0	0	8	0	0	0
b0cbef99da1378c7b5c09ed3c745d8bc	0	0	0	0	0	0	0	0	0	0	0	0	0	0	0	0	0	0	0	0	0	0	0	0	0	0	0	0	0	0	0	0	0	13	19	0	0
aade5f81a14f82300823c6273f30c04e	0	0	0	0	0	0	0	0	0	32	0	0	0	0	0	0	0	0	0	0	0	0	0	0	0	0	0	0	0	0	0	0	0	0	0	0	0
a3ff1c34d871fa6660ee4e35ab6c9e9b	0	0	0	0	0	0	3	29	0	0	0	0	0	0	0	0	0	0	0	0	0	0	0	0	0	0	0	0	0	0	0	0	0	0	0	0	0
a0b7ed8f52a4444fb7a502a7b61001b9	0	0	0	0	29	0	0	0	0	0	0	0	0	3	0	0	0	0	0	0	0	0	0	0	0	0	0	0	0	0	0	0	0	0	0	0	0
a021b663142ac1860acf963f12ef0e3f	0	0	0	0	0	0	0	0	0	0	0	0	0	0	0	0	0	0	0	0	0	0	0	0	0	0	0	0	0	32	0	0	0	0	0	0	0
9ecda3f91b0d9516bb3f76a020766c1a	0	0	0	0	0	0	0	0	0	32	0	0	0	0	0	0	0	0	0	0	0	0	0	0	0	0	0	0	0	0	0	0	0	0	0	0	0
988771442aff6bfc123e698073c5c83b	0	0	0	0	0	0	0	0	14	0	0	0	0	0	0	0	18	0	0	0	0	0	0	0	0	0	0	0	0	0	0	0	0	0	0	0	0
9632a9ded2034d6b404a5c9af93a9870	0	0	0	0	0	0	0	0	0	0	0	0	0	0	0	0	0	0	0	0	0	0	0	0	0	0	0	0	0	0	0	0	0	0	0	32	0
8f5f19b13c8838c12b4b44c66eed42ba	0	32	0	0	0	0	0	0	0	0	0	0	0	0	0	0	0	0	0	0	0	0	0	0	0	0	0	0	0	0	0	0	0	0	0	0	0
8e88848e0c1a00a879f0d52cd466c383	32	0	0	0	0	0	0	0	0	0	0	0	0	0	0	0	0	0	0	0	0	0	0	0	0	0	0	0	0	0	0	0	0	0	0	0	0
7efe8231a2feb212f0fac7496ea2add8	0	0	0	0	0	0	0	0	0	0	0	0	0	0	0	0	0	0	0	0	0	0	0	0	0	0	0	0	0	3	0	29	0	0	0	0	0
7d5f1b2fd2112ae1e6351e4e65fae20a	0	0	0	29	0	0	0	0	0	0	0	0	0	0	3	0	0	0	0	0	0	0	0	0	0	0	0	0	0	0	0	0	0	0	0	0	0
645351aefdf6f477e0e931c350d5275d	0	0	0	0	0	0	0	0	0	0	0	0	0	0	0	0	0	0	0	0	0	0	0	0	0	32	0	0	0	0	0	0	0	0	0	0	0
60822b6b1c83c643ff64e7237d42e862	32	0	0	0	0	0	0	0	0	0	0	0	0	0	0	0	0	0	0	0	0	0	0	0	0	0	0	0	0	0	0	0	0	0	0	0	0
4db3c1db9970f3046b5883cee0044181	0	32	0	0	0	0	0	0	0	0	0	0	0	0	0	0	0	0	0	0	0	0	0	0	0	0	0	0	0	0	0	0	0	0	0	0	0
449a1c55a17082f73237d8b66f5c115f	0	0	15	0	0	0	0	0	0	0	0	0	0	0	17	0	0	0	0	0	0	0	0	0	0	0	0	0	0	0	0	0	0	0	0	0	0
376cd2440454281cdc9fa4728973588d	0	0	0	0	0	0	0	0	0	0	0	0	0	0	0	0	0	0	0	0	0	0	0	0	32	0	0	0	0	0	0	0	0	0	0	0	0
0159ae7ef80c674eef6a1e0d8aee31d9	0	0	0	32	0	0	0	0	0	0	0	0	0	0	0	0	0	0	0	0	0	0	0	0	0	0	0	0	0	0	0	0	0	0	0	0	0
fb38fd5e03035cd57c7b7e042d1dcf5e	0	0	0	0	0	0	0	0	0	0	0	0	0	0	0	0	0	0	0	0	0	31	0	0	0	0	0	0	0	0	0	0	0	0	0	0	0
f7cb783f9466bc5045dc5326d0f707bd	31	0	0	0	0	0	0	0	0	0	0	0	0	0	0	0	0	0	0	0	0	0	0	0	0	0	0	0	0	0	0	0	0	0	0	0	0
eb7985ef7cebc2fa1f0420db8a0ed7ae	0	0	0	0	0	0	0	0	0	14	0	0	0	0	0	0	0	0	0	0	0	0	0	0	0	0	0	0	0	0	0	0	17	0	0	0	0
e951e732a7e1bee1912323ea5551d044	0	0	0	0	0	0	0	0	0	0	0	0	0	0	0	0	0	0	0	0	0	31	0	0	0	0	0	0	0	0	0	0	0	0	0	0	0
e818065395db261eb7d8344bcd5c94f3	0	0	0	0	0	0	0	0	0	31	0	0	0	0	0	0	0	0	0	0	0	0	0	0	0	0	0	0	0	0	0	0	0	0	0	0	0
e7cda418d9d3c91cfbe8be1499131360	0	0	0	0	0	0	0	0	0	0	0	0	0	0	0	31	0	0	0	0	0	0	0	0	0	0	0	0	0	0	0	0	0	0	0	0	0
d9f84f1ee44e54c6bacfa9b7e45e7b29	31	0	0	0	0	0	0	0	0	0	0	0	0	0	0	0	0	0	0	0	0	0	0	0	0	0	0	0	0	0	0	0	0	0	0	0	0
cc032e12c83f7eba771327c9035ef20a	0	0	0	0	0	0	0	0	0	0	0	0	0	0	31	0	0	0	0	0	0	0	0	0	0	0	0	0	0	0	0	0	0	0	0	0	0
c673acf2867fbc0f628aa2ff5ae7b424	0	0	0	0	0	0	0	0	31	0	0	0	0	0	0	0	0	0	0	0	0	0	0	0	0	0	0	0	0	0	0	0	0	0	0	0	0
c59f440f27685033f89a238aa8a16c40	0	31	0	0	0	0	0	0	0	0	0	0	0	0	0	0	0	0	0	0	0	0	0	0	0	0	0	0	0	0	0	0	0	0	0	0	0
c06d69c511c523568e0cecb1b1e482f3	0	0	0	0	0	0	0	0	31	0	0	0	0	0	0	0	0	0	0	0	0	0	0	0	0	0	0	0	0	0	0	0	0	0	0	0	0
b997f944e81ead86189be9d753a26282	0	0	0	0	0	0	0	0	0	31	0	0	0	0	0	0	0	0	0	0	0	0	0	0	0	0	0	0	0	0	0	0	0	0	0	0	0
b4a7f7b5ab943eb615ffc22973eea0bf	0	0	0	0	0	0	0	0	0	0	0	0	0	0	0	0	0	0	0	0	0	0	0	0	0	0	0	0	0	11	0	20	0	0	0	0	0
ac2f055a0cd6043510c0a0250a3a3510	0	0	0	0	0	0	0	27	0	0	0	4	0	0	0	0	0	0	0	0	0	0	0	0	0	0	0	0	0	0	0	0	0	0	0	0	0
97d49c493da25b6907c9c7e20b3ab972	0	0	0	0	0	0	0	0	31	0	0	0	0	0	0	0	0	0	0	0	0	0	0	0	0	0	0	0	0	0	0	0	0	0	0	0	0
9590d72b2e0cf8d09c71c01a74c65da2	0	0	0	0	0	0	0	0	0	29	0	0	0	0	0	0	0	0	0	2	0	0	0	0	0	0	0	0	0	0	0	0	0	0	0	0	0
8b2db81459bbbd5932bbba44672e7875	0	0	3	0	0	0	0	0	0	0	28	0	0	0	0	0	0	0	0	0	0	0	0	0	0	0	0	0	0	0	0	0	0	0	0	0	0
8ae51fd38d299ead61a751416d6b438d	0	0	0	31	0	0	0	0	0	0	0	0	0	0	0	0	0	0	0	0	0	0	0	0	0	0	0	0	0	0	0	0	0	0	0	0	0
7ec45b5e4f494b6e85296e78fee90c29	0	0	0	0	0	0	0	0	0	0	31	0	0	0	0	0	0	0	0	0	0	0	0	0	0	0	0	0	0	0	0	0	0	0	0	0	0
785997d616149dcb19845475565087e4	0	0	0	0	0	0	0	0	0	0	0	0	0	0	10	0	21	0	0	0	0	0	0	0	0	0	0	0	0	0	0	0	0	0	0	0	0
75aa3cb67c085ed7f97f747794c245e1	0	0	0	0	0	0	0	0	0	0	0	0	0	0	0	0	0	0	0	0	0	0	0	0	0	0	0	0	0	0	0	0	31	0	0	0	0
6bfc6772b2ac2631e8a4be9b504c115a	0	0	0	0	0	0	0	18	0	0	0	0	0	0	13	0	0	0	0	0	0	0	0	0	0	0	0	0	0	0	0	0	0	0	0	0	0
67c4b53e19f28d3e7e5815e81ac5d217	0	0	0	0	31	0	0	0	0	0	0	0	0	0	0	0	0	0	0	0	0	0	0	0	0	0	0	0	0	0	0	0	0	0	0	0	0
672c20102ba67de4dbf0d3af3783cccf	0	0	0	0	0	0	4	8	0	0	0	0	0	0	0	0	0	5	0	0	0	0	0	8	0	0	0	0	0	0	4	0	0	0	0	2	0
5fb253ae1eb1accf0a91a53d152063e1	0	0	0	0	0	0	0	0	0	0	0	0	0	0	0	0	0	0	0	0	0	0	0	0	0	0	0	19	0	0	0	12	0	0	0	0	0
495f28cb182ad6669f24fa58f900ad16	0	0	0	0	0	0	0	0	0	0	0	0	0	0	31	0	0	0	0	0	0	0	0	0	0	0	0	0	0	0	0	0	0	0	0	0	0
487d527b733b5a43c6392c20916e60b7	0	31	0	0	0	0	0	0	0	0	0	0	0	0	0	0	0	0	0	0	0	0	0	0	0	0	0	0	0	0	0	0	0	0	0	0	0
46e9e02a621ab01d20737fb382143f88	0	0	0	0	0	0	0	0	0	0	0	31	0	0	0	0	0	0	0	0	0	0	0	0	0	0	0	0	0	0	0	0	0	0	0	0	0
42adad7b68cf001e9cb523e9360d1e1f	0	0	0	0	0	0	0	0	0	0	0	0	0	0	0	0	0	0	0	29	0	2	0	0	0	0	0	0	0	0	0	0	0	0	0	0	0
2568cc1e979fa616c61f58ffe0d432ed	0	31	0	0	0	0	0	0	0	0	0	0	0	0	0	0	0	0	0	0	0	0	0	0	0	0	0	0	0	0	0	0	0	0	0	0	0
1eec0551dedb4c6bf58fb5b24fbacda9	0	0	0	0	0	0	0	0	0	0	0	0	0	0	0	0	0	0	0	0	0	0	0	0	0	0	0	0	31	0	0	0	0	0	0	0	0
1cbc34596237ff2e70ffb866d7922fba	0	31	0	0	0	0	0	0	0	0	0	0	0	0	0	0	0	0	0	0	0	0	0	0	0	0	0	0	0	0	0	0	0	0	0	0	0
0412801b31bff00141b9b517e618d4aa	0	0	0	0	0	0	0	0	0	0	0	0	0	0	0	0	0	31	0	0	0	0	0	0	0	0	0	0	0	0	0	0	0	0	0	0	0
edbcd30be74115192d3737a4d2d2a011	0	0	0	0	30	0	0	0	0	0	0	0	0	0	0	0	0	0	0	0	0	0	0	0	0	0	0	0	0	0	0	0	0	0	0	0	0
dd5f6ca578f8eca02a1d0b0ec6de4a3d	0	0	0	0	0	0	0	0	0	30	0	0	0	0	0	0	0	0	0	0	0	0	0	0	0	0	0	0	0	0	0	0	0	0	0	0	0
d7ff4f9a474a9d9531ff75696818446b	0	28	0	0	0	0	0	0	0	0	0	0	0	0	0	0	0	0	0	0	0	0	0	0	2	0	0	0	0	0	0	0	0	0	0	0	0
c6f60689d4d3d9d6121aee476dae1b12	0	30	0	0	0	0	0	0	0	0	0	0	0	0	0	0	0	0	0	0	0	0	0	0	0	0	0	0	0	0	0	0	0	0	0	0	0
c38eff098648d905e672e42cd5610a22	30	0	0	0	0	0	0	0	0	0	0	0	0	0	0	0	0	0	0	0	0	0	0	0	0	0	0	0	0	0	0	0	0	0	0	0	0
b3dc19b0ca66f40e4b8048d034556911	0	0	0	0	0	0	0	0	0	0	0	0	0	0	0	0	0	0	0	0	0	0	0	0	30	0	0	0	0	0	0	0	0	0	0	0	0
b225d78f3606aaea3222a90099d7b744	0	0	0	0	0	0	0	0	0	0	0	0	0	0	0	0	0	0	0	0	0	0	0	0	0	0	0	0	0	30	0	0	0	0	0	0	0
ae4748a714220ba7393f0aed19001c14	0	0	0	0	0	0	0	5	0	0	0	0	0	0	0	0	25	0	0	0	0	0	0	0	0	0	0	0	0	0	0	0	0	0	0	0	0
abec9ee8a05a19b83a8e38dfcacbec97	0	0	0	0	0	0	0	0	0	0	0	0	0	0	0	0	0	0	0	0	0	15	15	0	0	0	0	0	0	0	0	0	0	0	0	0	0
ab9cbd8dbb9dbe9765708eaf6173ba4a	0	0	0	0	0	0	0	0	0	0	0	0	0	0	0	0	0	0	0	0	30	0	0	0	0	0	0	0	0	0	0	0	0	0	0	0	0
a795aa5fb57f43beafddb0305ede47c4	0	0	0	0	10	0	0	0	0	0	0	0	0	0	0	0	0	20	0	0	0	0	0	0	0	0	0	0	0	0	0	0	0	0	0	0	0
a7174350002e8baf61e2d992912688a0	0	0	0	25	0	0	0	0	5	0	0	0	0	0	0	0	0	0	0	0	0	0	0	0	0	0	0	0	0	0	0	0	0	0	0	0	0
a6633e572930e169f8c07813c3b3cf31	0	0	0	24	0	0	0	0	0	0	0	0	0	0	0	0	0	0	0	0	0	0	0	0	0	0	6	0	0	0	0	0	0	0	0	0	0
a5e9fb1ab2dc4a66e2403484ec61705d	0	30	0	0	0	0	0	0	0	0	0	0	0	0	0	0	0	0	0	0	0	0	0	0	0	0	0	0	0	0	0	0	0	0	0	0	0
8d6ccb76ee853e0a29990324eddf0c30	0	0	0	6	7	0	0	0	0	0	0	0	0	0	0	0	0	0	0	0	0	4	0	0	0	13	0	0	0	0	0	0	0	0	0	0	0
8ba90c30f4a538932029cb05a325c9ce	0	0	0	0	0	0	0	0	0	0	0	30	0	0	0	0	0	0	0	0	0	0	0	0	0	0	0	0	0	0	0	0	0	0	0	0	0
812d6dd2ac4c496d05cf816a8ece3a9e	0	0	0	0	0	0	0	0	30	0	0	0	0	0	0	0	0	0	0	0	0	0	0	0	0	0	0	0	0	0	0	0	0	0	0	0	0
7d91203f175430765f14b752bd19c7b3	0	0	0	0	0	0	0	0	0	0	0	0	0	0	0	0	0	0	0	0	0	0	0	30	0	0	0	0	0	0	0	0	0	0	0	0	0
7cbebea20e305a557ffc3dc23bae61ae	0	0	0	28	0	0	0	0	0	0	0	0	0	2	0	0	0	0	0	0	0	0	0	0	0	0	0	0	0	0	0	0	0	0	0	0	0
70ebaf38fb065fe4e4ed397542bb29a5	17	0	0	0	0	0	0	0	0	0	0	0	0	0	0	0	0	0	0	0	0	0	0	0	0	0	0	0	0	0	0	0	0	0	0	0	13
5e53760abf4aa597a034f5cd00a2d64d	0	0	0	0	0	0	0	0	0	0	0	0	0	30	0	0	0	0	0	0	0	0	0	0	0	0	0	0	0	0	0	0	0	0	0	0	0
579660425f239a1ec5e918fdc9cfcd89	0	0	0	0	0	0	0	0	0	30	0	0	0	0	0	0	0	0	0	0	0	0	0	0	0	0	0	0	0	0	0	0	0	0	0	0	0
4a28a0996122788f69dd25d944c313f0	0	30	0	0	0	0	0	0	0	0	0	0	0	0	0	0	0	0	0	0	0	0	0	0	0	0	0	0	0	0	0	0	0	0	0	0	0
3fa5e8075bd765f725a89e1289e18503	0	7	15	0	0	0	0	8	0	0	0	0	0	0	0	0	0	0	0	0	0	0	0	0	0	0	0	0	0	0	0	0	0	0	0	0	0
3a21e2325b5ff453d02a34566757e91c	0	0	0	0	0	0	0	0	0	0	0	0	0	0	0	0	0	0	0	0	0	0	0	0	30	0	0	0	0	0	0	0	0	0	0	0	0
3652ec25ff98484cf54c4e099f750714	0	0	0	18	0	0	0	0	0	0	0	0	0	0	0	0	0	0	0	0	0	0	0	0	0	0	12	0	0	0	0	0	0	0	0	0	0
3309b77ef0dfafcfd3a9eeef2edd7230	0	0	0	0	0	0	0	0	30	0	0	0	0	0	0	0	0	0	0	0	0	0	0	0	0	0	0	0	0	0	0	0	0	0	0	0	0
2db9089f79fea19a6ccb557c6de430b6	0	0	0	0	0	0	0	0	0	0	0	0	0	0	0	0	0	0	0	0	0	0	0	0	0	0	0	0	0	30	0	0	0	0	0	0	0
2c65d8acbf2b38cde21b921f861184a4	0	0	0	0	0	0	0	0	0	0	0	0	0	0	0	0	30	0	0	0	0	0	0	0	0	0	0	0	0	0	0	0	0	0	0	0	0
27683ed91c772bf0ee0ca3840f70c8be	0	0	0	0	0	0	0	0	0	0	0	30	0	0	0	0	0	0	0	0	0	0	0	0	0	0	0	0	0	0	0	0	0	0	0	0	0
20c5dac27a86c10f36a376d50adf3c3b	0	30	0	0	0	0	0	0	0	0	0	0	0	0	0	0	0	0	0	0	0	0	0	0	0	0	0	0	0	0	0	0	0	0	0	0	0
1f3460a3fb7a2175ebd5d59edb53d443	0	0	0	0	0	0	0	0	0	30	0	0	0	0	0	0	0	0	0	0	0	0	0	0	0	0	0	0	0	0	0	0	0	0	0	0	0
15d2204fbf7961911faf436f43c3f23a	0	0	0	0	0	0	0	17	0	0	0	0	0	0	0	0	0	0	0	9	0	0	0	0	0	0	0	0	0	4	0	0	0	0	0	0	0
1599257622467a3b726e9bcd17a35e1c	0	10	0	0	0	0	0	0	16	0	0	0	0	0	0	0	0	0	0	0	0	0	0	0	0	0	0	0	0	0	0	0	4	0	0	0	0
137899644d660536b606a9b929904cfb	30	0	0	0	0	0	0	0	0	0	0	0	0	0	0	0	0	0	0	0	0	0	0	0	0	0	0	0	0	0	0	0	0	0	0	0	0
12d15733a4d7173e32399639810ad27a	0	0	0	0	0	0	0	0	0	0	0	0	0	0	30	0	0	0	0	0	0	0	0	0	0	0	0	0	0	0	0	0	0	0	0	0	0
0f9b622d47ee1bfac82cda095d1dfbeb	0	0	0	0	0	0	0	0	0	0	0	0	0	0	0	0	0	0	0	0	0	0	0	0	30	0	0	0	0	0	0	0	0	0	0	0	0
0b5484de102a820fee300a3b09916e6f	0	0	0	0	0	0	0	0	0	0	0	0	0	0	0	30	0	0	0	0	0	0	0	0	0	0	0	0	0	0	0	0	0	0	0	0	0
06755e2c765dc2d78a1d351e29f32e35	0	8	0	0	0	0	0	0	0	0	0	0	0	0	0	0	0	0	0	0	0	0	0	0	20	0	0	0	0	0	0	2	0	0	0	0	0
ff46a515298efa079d2001d623ada6c1	0	0	0	0	0	0	0	0	0	0	0	0	0	0	0	0	0	0	0	0	0	0	0	0	29	0	0	0	0	0	0	0	0	0	0	0	0
faf4f1fa4e629e4aaecbdb201be31b2b	0	0	0	0	0	0	0	0	0	0	0	0	0	0	0	0	0	0	0	0	0	0	0	0	9	0	0	0	0	0	0	20	0	0	0	0	0
f54da71ac36e400d0bb0a8c77bfbd5a8	0	0	0	0	0	0	0	0	0	0	0	0	0	0	0	0	0	0	0	0	0	0	0	0	0	0	0	0	0	0	0	29	0	0	0	0	0
f5195e9641ddf8299494a25331bd0f85	0	0	0	0	0	0	0	0	0	0	0	0	0	0	0	0	0	0	0	0	0	0	0	0	7	0	0	0	0	5	0	17	0	0	0	0	0
cfdee6a8469ab5ee264ec64fb8a11e6c	0	29	0	0	0	0	0	0	0	0	0	0	0	0	0	0	0	0	0	0	0	0	0	0	0	0	0	0	0	0	0	0	0	0	0	0	0
cb7b4841f837e90ee864fdabb5f3b249	0	0	0	0	0	0	0	29	0	0	0	0	0	0	0	0	0	0	0	0	0	0	0	0	0	0	0	0	0	0	0	0	0	0	0	0	0
c728dd0c254ffc149bccc9d23fd4dede	0	0	0	0	0	0	0	0	0	0	0	0	0	0	0	0	0	29	0	0	0	0	0	0	0	0	0	0	0	0	0	0	0	0	0	0	0
b9a4d3cedc4517e5f0e2dad0e753fa12	0	0	0	0	0	23	0	6	0	0	0	0	0	0	0	0	0	0	0	0	0	0	0	0	0	0	0	0	0	0	0	0	0	0	0	0	0
a005e50d6b7abe0668d1227314373a3f	0	0	0	0	0	0	0	0	0	0	0	0	0	0	0	0	0	0	0	0	0	0	0	0	0	0	0	0	0	0	0	0	0	0	29	0	0
9c1ff02f28f0c4e6c714dcff7e4f7573	29	0	0	0	0	0	0	0	0	0	0	0	0	0	0	0	0	0	0	0	0	0	0	0	0	0	0	0	0	0	0	0	0	0	0	0	0
9447faaa8c27b1ffbe4495ef7fc8d8c5	0	0	0	11	0	0	0	0	18	0	0	0	0	0	0	0	0	0	0	0	0	0	0	0	0	0	0	0	0	0	0	0	0	0	0	0	0
5a095cdc28b73fd95af9b2ebaaa0b6b8	0	0	0	0	0	0	0	0	0	0	0	0	0	0	0	0	29	0	0	0	0	0	0	0	0	0	0	0	0	0	0	0	0	0	0	0	0
4940a75a34f4850a4382156fe5bbff5d	29	0	0	0	0	0	0	0	0	0	0	0	0	0	0	0	0	0	0	0	0	0	0	0	0	0	0	0	0	0	0	0	0	0	0	0	0
3486be1ec0ea5f94418cf951abe43a7f	0	0	0	0	0	0	0	0	0	29	0	0	0	0	0	0	0	0	0	0	0	0	0	0	0	0	0	0	0	0	0	0	0	0	0	0	0
29c6ae0cca776798947d6230d8a2c558	0	0	0	0	0	0	0	0	0	0	0	0	0	0	0	0	29	0	0	0	0	0	0	0	0	0	0	0	0	0	0	0	0	0	0	0	0
25ebc51d9141defc1e2f6a791341fa94	0	0	0	0	0	0	0	0	0	0	0	0	0	0	0	0	0	0	0	0	0	0	0	0	29	0	0	0	0	0	0	0	0	0	0	0	0
25c387fa46de6e3acd31a6686882681c	0	0	0	0	0	0	0	0	0	0	0	0	0	0	0	0	0	0	0	0	0	0	0	0	29	0	0	0	0	0	0	0	0	0	0	0	0
239e208b803c45a58afce2aea63ab7f5	0	0	0	0	0	0	0	0	0	0	0	0	0	0	0	0	0	0	0	0	0	0	0	0	0	0	0	0	0	0	0	0	0	29	0	0	0
1ce2113a0f670bb76187ac69e2a1c9d6	0	0	0	0	23	0	0	0	0	0	0	0	0	0	0	6	0	0	0	0	0	0	0	0	0	0	0	0	0	0	0	0	0	0	0	0	0
15a9ecafd30e9a8d61efe135cdefe54c	0	0	0	17	0	0	0	0	12	0	0	0	0	0	0	0	0	0	0	0	0	0	0	0	0	0	0	0	0	0	0	0	0	0	0	0	0
0ac6734f2b63f05e5c14a97f8becea3a	0	0	0	0	0	0	0	0	0	0	0	0	0	0	0	0	0	0	0	0	0	0	0	0	0	0	29	0	0	0	0	0	0	0	0	0	0
000da34d2df2f03f65d5e30c17b9b6f5	29	0	0	0	0	0	0	0	0	0	0	0	0	0	0	0	0	0	0	0	0	0	0	0	0	0	0	0	0	0	0	0	0	0	0	0	0
d43d1052280ed3fc8fd327958f5a7f1d	0	0	0	0	0	0	0	0	0	0	28	0	0	0	0	0	0	0	0	0	0	0	0	0	0	0	0	0	0	0	0	0	0	0	0	0	0
d3eb244acd368f08ef62e831f27548f8	0	0	0	0	0	0	0	0	0	0	0	0	0	0	0	0	0	0	0	0	0	0	0	0	28	0	0	0	0	0	0	0	0	0	0	0	0
d2dfc3c1e73724600610ba566d0d9d9a	0	0	0	0	0	0	0	28	0	0	0	0	0	0	0	0	0	0	0	0	0	0	0	0	0	0	0	0	0	0	0	0	0	0	0	0	0
d17730e6e9a56be6ac9c9b5d3733ca58	0	0	0	0	0	0	0	0	0	0	0	0	0	0	0	0	0	0	0	0	0	0	0	0	0	0	0	15	0	0	0	0	0	13	0	0	0
d02e363d23a549d3685b92b8bf36105e	0	0	0	0	0	0	0	0	0	28	0	0	0	0	0	0	0	0	0	0	0	0	0	0	0	0	0	0	0	0	0	0	0	0	0	0	0
d00b580e271377bec8959b053711047b	28	0	0	0	0	0	0	0	0	0	0	0	0	0	0	0	0	0	0	0	0	0	0	0	0	0	0	0	0	0	0	0	0	0	0	0	0
b3de19dd56824c49b76a0c847de693eb	0	0	0	0	0	0	0	0	0	0	0	0	0	0	0	0	0	0	0	0	0	0	0	0	0	0	0	0	0	0	0	0	28	0	0	0	0
9b992d70eca03ffe1683d8ce1fff136a	0	0	0	0	0	0	0	0	0	28	0	0	0	0	0	0	0	0	0	0	0	0	0	0	0	0	0	0	0	0	0	0	0	0	0	0	0
9a5d1e3d6e38fe55094b78a9e4c3636a	0	0	0	0	0	0	0	0	0	0	0	0	0	0	0	0	0	0	0	0	0	0	0	28	0	0	0	0	0	0	0	0	0	0	0	0	0
941001c13a7a552e5ce11a676243aa0a	0	0	0	0	0	0	0	0	0	0	0	0	0	0	28	0	0	0	0	0	0	0	0	0	0	0	0	0	0	0	0	0	0	0	0	0	0
922d0d579b8fbd3aee2fae7e90a9d38c	0	0	0	0	0	28	0	0	0	0	0	0	0	0	0	0	0	0	0	0	0	0	0	0	0	0	0	0	0	0	0	0	0	0	0	0	0
8cb75be612bb1c92a76f6eb011535f50	0	0	0	0	0	0	0	0	0	0	0	0	0	0	0	0	0	0	0	0	0	0	0	0	0	0	0	0	0	28	0	0	0	0	0	0	0
89385b64e4e563bd10e8822c6868eaf1	0	0	0	0	0	0	0	0	0	0	0	0	0	0	0	0	0	0	0	0	0	0	0	0	0	0	28	0	0	0	0	0	0	0	0	0	0
82a078817cf6f9e48f83bc5eb2793675	28	0	0	0	0	0	0	0	0	0	0	0	0	0	0	0	0	0	0	0	0	0	0	0	0	0	0	0	0	0	0	0	0	0	0	0	0
7e4a9280c7ae8ef7433ebc2e8ee8bf9d	0	28	0	0	0	0	0	0	0	0	0	0	0	0	0	0	0	0	0	0	0	0	0	0	0	0	0	0	0	0	0	0	0	0	0	0	0
799a40b2ec00542781197166b2e77f88	0	0	0	0	28	0	0	0	0	0	0	0	0	0	0	0	0	0	0	0	0	0	0	0	0	0	0	0	0	0	0	0	0	0	0	0	0
77c249c6e492c03eeb53f1b460ee462a	0	0	0	0	0	0	0	0	0	0	0	0	0	0	17	11	0	0	0	0	0	0	0	0	0	0	0	0	0	0	0	0	0	0	0	0	0
6eba9445e110cbc72a34bf0b348d71ee	0	0	0	0	0	0	0	0	0	0	28	0	0	0	0	0	0	0	0	0	0	0	0	0	0	0	0	0	0	0	0	0	0	0	0	0	0
5cf89a22bf8384673fd71bbfe96996da	0	28	0	0	0	0	0	0	0	0	0	0	0	0	0	0	0	0	0	0	0	0	0	0	0	0	0	0	0	0	0	0	0	0	0	0	0
5601022f2a14f1c2e4910b69d80c7b3d	0	0	0	0	0	0	0	0	0	0	0	0	0	0	0	0	0	0	0	0	0	0	0	0	0	28	0	0	0	0	0	0	0	0	0	0	0
4a045320ba661b314abe0231211a61af	0	0	20	0	0	0	0	0	0	0	0	0	0	0	8	0	0	0	0	0	0	0	0	0	0	0	0	0	0	0	0	0	0	0	0	0	0
4769bc41e83fb69b6fbd24a50dd111f8	0	0	0	0	12	0	2	14	0	0	0	0	0	0	0	0	0	0	0	0	0	0	0	0	0	0	0	0	0	0	0	0	0	0	0	0	0
433199efad9ab34545cdfc58b9de5cf0	0	0	0	0	0	0	0	0	0	0	0	0	0	0	0	0	0	0	0	0	0	0	0	0	0	0	0	0	0	0	0	0	0	0	0	0	28
40f152dc880095f62cd2eff1000a97f2	0	0	0	0	0	0	0	0	0	0	0	0	0	28	0	0	0	0	0	0	0	0	0	0	0	0	0	0	0	0	0	0	0	0	0	0	0
3f284b1519cd020b986f22155a4df54a	0	0	0	0	0	0	0	0	0	28	0	0	0	0	0	0	0	0	0	0	0	0	0	0	0	0	0	0	0	0	0	0	0	0	0	0	0
35514340c682473fbcbb87a4a64eb7cb	28	0	0	0	0	0	0	0	0	0	0	0	0	0	0	0	0	0	0	0	0	0	0	0	0	0	0	0	0	0	0	0	0	0	0	0	0
32ed0c206dd73b26a58932e3e325a532	0	0	0	0	0	0	0	0	0	28	0	0	0	0	0	0	0	0	0	0	0	0	0	0	0	0	0	0	0	0	0	0	0	0	0	0	0
30ee39b3e0ae47480ac5dd8315087ec8	0	0	0	0	0	0	0	0	0	0	0	0	0	0	0	0	0	0	0	0	0	0	0	28	0	0	0	0	0	0	0	0	0	0	0	0	0
176455215c70a38132b2def28c112d3e	0	0	0	0	0	0	0	0	0	20	0	0	0	0	0	0	0	0	0	0	0	0	0	0	0	0	0	0	0	0	0	0	0	0	0	0	8
14063003e1f89e9b8e46f3932fecaabd	0	7	0	0	0	0	0	0	0	0	0	0	0	0	0	0	0	0	0	0	0	0	0	0	21	0	0	0	0	0	0	0	0	0	0	0	0
13baa1fcf2d1518788d7ad32b72f330b	18	0	0	0	0	0	0	0	0	0	0	0	0	10	0	0	0	0	0	0	0	0	0	0	0	0	0	0	0	0	0	0	0	0	0	0	0
120b65925b2164ac47614adfbef82e72	0	0	0	0	0	0	0	0	0	0	0	0	0	0	0	0	0	0	0	0	0	0	0	0	0	28	0	0	0	0	0	0	0	0	0	0	0
ffe3bd698f5171092bdea78bd0ac22d5	0	0	0	0	0	0	0	0	0	0	27	0	0	0	0	0	0	0	0	0	0	0	0	0	0	0	0	0	0	0	0	0	0	0	0	0	0
ea43041e82d3f724647bf48170485039	0	14	0	0	0	0	0	0	0	0	0	0	0	0	0	0	0	0	0	0	0	8	0	0	0	0	0	0	0	0	0	5	0	0	0	0	0
dbcdcd1fc232fde942ee512b7af0830f	0	0	0	0	0	0	0	0	0	0	0	0	0	27	0	0	0	0	0	0	0	0	0	0	0	0	0	0	0	0	0	0	0	0	0	0	0
d5e6a40973a4e185d2e4e99b981790f0	0	0	0	0	0	0	0	0	0	0	0	0	0	0	0	0	0	0	0	0	0	0	0	0	0	0	0	0	0	0	0	0	27	0	0	0	0
c7d55d7c1d1891b2adb74a71040a3e46	0	0	0	0	0	0	0	0	0	0	0	0	0	0	0	0	0	0	0	0	0	0	0	0	0	0	0	0	0	0	0	0	0	7	20	0	0
c3bb9881d756036d2d2e52c2f97c4a53	3	24	0	0	0	0	0	0	0	0	0	0	0	0	0	0	0	0	0	0	0	0	0	0	0	0	0	0	0	0	0	0	0	0	0	0	0
c0b81006279e7ac2c7fa5c9b53469e9b	0	0	0	0	0	0	0	0	0	27	0	0	0	0	0	0	0	0	0	0	0	0	0	0	0	0	0	0	0	0	0	0	0	0	0	0	0
bd4f981a29e72892bce38d9ce64e9e0f	0	0	0	0	0	0	0	0	0	27	0	0	0	0	0	0	0	0	0	0	0	0	0	0	0	0	0	0	0	0	0	0	0	0	0	0	0
b94bd056e1a59b7bceb76b339ff7e9fe	27	0	0	0	0	0	0	0	0	0	0	0	0	0	0	0	0	0	0	0	0	0	0	0	0	0	0	0	0	0	0	0	0	0	0	0	0
ace5773dac37919310359cbf9a609746	0	0	0	0	0	0	0	0	0	0	0	0	0	0	0	0	0	0	0	0	0	0	0	0	0	27	0	0	0	0	0	0	0	0	0	0	0
a158c7591d292e042ca671cb61a2b8da	0	0	0	0	0	0	0	0	0	0	0	0	0	0	0	0	0	0	0	0	0	0	0	0	0	0	0	0	0	0	0	0	0	0	0	0	27
a0232c63d2993be5d2284d5fd6cf506e	0	0	0	0	0	0	0	27	0	0	0	0	0	0	0	0	0	0	0	0	0	0	0	0	0	0	0	0	0	0	0	0	0	0	0	0	0
9bf323f6fabb76911556e33829a14650	0	27	0	0	0	0	0	0	0	0	0	0	0	0	0	0	0	0	0	0	0	0	0	0	0	0	0	0	0	0	0	0	0	0	0	0	0
9919deaa3b7f3147c3c6b9f82c9d8058	27	0	0	0	0	0	0	0	0	0	0	0	0	0	0	0	0	0	0	0	0	0	0	0	0	0	0	0	0	0	0	0	0	0	0	0	0
95d2d1d7ee36a723ab50feb1e600bdc2	0	0	0	0	0	0	0	0	0	0	0	0	0	0	0	0	0	6	0	0	0	0	0	0	0	0	0	0	0	0	0	5	0	0	0	0	16
7cd4bdd9eaca1cd65042f141e89f6038	0	0	0	0	0	0	0	0	0	0	0	0	0	0	0	0	0	0	27	0	0	0	0	0	0	0	0	0	0	0	0	0	0	0	0	0	0
6774ec765e808a0ac6124c3cdec74307	0	0	0	0	0	0	0	0	0	0	0	27	0	0	0	0	0	0	0	0	0	0	0	0	0	0	0	0	0	0	0	0	0	0	0	0	0
6078809471e09adff34a33c30d7d17d6	0	0	0	0	0	0	0	0	0	27	0	0	0	0	0	0	0	0	0	0	0	0	0	0	0	0	0	0	0	0	0	0	0	0	0	0	0
3fa39fb96f68ade0f4feeee39d0344f6	0	0	0	0	7	0	0	0	0	0	0	0	0	0	0	0	0	0	0	0	0	0	0	0	0	0	0	0	0	4	16	0	0	0	0	0	0
3c2934680d564f24be3099a620adb243	0	7	0	0	0	0	0	0	0	0	0	0	0	0	0	0	0	0	0	0	0	0	0	0	0	0	0	0	0	0	0	0	0	0	20	0	0
3501832247f953170b248287736ced07	0	0	0	22	0	0	0	0	0	0	0	0	0	0	0	0	0	5	0	0	0	0	0	0	0	0	0	0	0	0	0	0	0	0	0	0	0
2ffc3192d169b9e21d818ac25c0f17cf	0	0	0	0	0	0	0	0	0	0	0	0	0	0	0	0	0	0	0	0	0	0	0	0	0	0	0	0	0	27	0	0	0	0	0	0	0
2f2e72467e04c49b190b703c448b5843	0	0	0	0	0	0	0	0	0	0	27	0	0	0	0	0	0	0	0	0	0	0	0	0	0	0	0	0	0	0	0	0	0	0	0	0	0
2ba235bf8992ebe15f19a89e03470c65	0	0	0	0	0	0	0	0	0	0	27	0	0	0	0	0	0	0	0	0	0	0	0	0	0	0	0	0	0	0	0	0	0	0	0	0	0
2a392351882e5ef24ba48badd044e725	0	0	0	0	0	0	0	0	0	0	27	0	0	0	0	0	0	0	0	0	0	0	0	0	0	0	0	0	0	0	0	0	0	0	0	0	0
2352ac0ca7096ec21a5459f3aee2ebd1	0	0	0	0	0	0	27	0	0	0	0	0	0	0	0	0	0	0	0	0	0	0	0	0	0	0	0	0	0	0	0	0	0	0	0	0	0
1ac75dc7aca783dea0cd0c86fcfcdab0	0	27	0	0	0	0	0	0	0	0	0	0	0	0	0	0	0	0	0	0	0	0	0	0	0	0	0	0	0	0	0	0	0	0	0	0	0
0ae7f06683b03d459118907342cea82b	0	0	0	0	0	0	0	0	27	0	0	0	0	0	0	0	0	0	0	0	0	0	0	0	0	0	0	0	0	0	0	0	0	0	0	0	0
fa38122ab305ae50e1b50678b3820e16	0	0	0	26	0	0	0	0	0	0	0	0	0	0	0	0	0	0	0	0	0	0	0	0	0	0	0	0	0	0	0	0	0	0	0	0	0
e68f17f844cc85f726565560257be63a	0	0	0	0	0	0	0	0	0	0	0	0	0	0	0	0	0	0	0	0	0	0	0	0	0	0	0	26	0	0	0	0	0	0	0	0	0
e5add932017c689e687497df06650885	0	0	0	26	0	0	0	0	0	0	0	0	0	0	0	0	0	0	0	0	0	0	0	0	0	0	0	0	0	0	0	0	0	0	0	0	0
d4967597b3aa77bd435d902997802acd	26	0	0	0	0	0	0	0	0	0	0	0	0	0	0	0	0	0	0	0	0	0	0	0	0	0	0	0	0	0	0	0	0	0	0	0	0
d4545e41cf018fe451933445c8d74aba	0	0	0	0	0	0	0	0	0	0	0	0	0	0	0	0	0	0	0	0	0	0	0	0	0	0	13	0	0	0	0	13	0	0	0	0	0
c9d42729c4199247e014538c0fafbaa4	0	0	0	0	0	0	0	26	0	0	0	0	0	0	0	0	0	0	0	0	0	0	0	0	0	0	0	0	0	0	0	0	0	0	0	0	0
c8857b153c134d796be7443bf64392c2	0	0	0	0	0	0	0	26	0	0	0	0	0	0	0	0	0	0	0	0	0	0	0	0	0	0	0	0	0	0	0	0	0	0	0	0	0
c51d5af66e9152e8b01b8e56e8f7e4fa	0	0	0	0	26	0	0	0	0	0	0	0	0	0	0	0	0	0	0	0	0	0	0	0	0	0	0	0	0	0	0	0	0	0	0	0	0
c4760aa2aed9871f59bd9ba0de8c4acd	0	0	0	0	0	0	0	0	0	0	6	0	0	2	18	0	0	0	0	0	0	0	0	0	0	0	0	0	0	0	0	0	0	0	0	0	0
bf7d39405c6f87658ef4a65f4054fa9b	0	0	0	0	0	0	0	0	0	0	0	0	0	0	0	0	0	0	0	0	0	0	0	0	0	26	0	0	0	0	0	0	0	0	0	0	0
bb05bd169c996366d81c93a3e6fd3caf	0	0	0	0	0	0	0	0	0	0	0	0	0	0	0	0	0	0	0	0	0	0	0	0	26	0	0	0	0	0	0	0	0	0	0	0	0
ba466b0b49a7a541663d6e4b37165134	0	0	0	0	0	0	0	0	0	0	0	0	0	0	0	0	26	0	0	0	0	0	0	0	0	0	0	0	0	0	0	0	0	0	0	0	0
b87d049a8d2341b93426a09c6027b800	0	0	0	0	0	0	0	0	23	0	0	0	0	0	0	0	0	0	0	0	0	0	0	0	0	0	3	0	0	0	0	0	0	0	0	0	0
b03adf7b8ad230d740f017cc3bc9c9e0	0	0	0	0	0	0	0	0	0	0	0	0	0	0	0	0	0	0	0	0	0	0	0	0	26	0	0	0	0	0	0	0	0	0	0	0	0
87b90122dc9f07e10038db840a5c4ac0	0	0	0	0	0	0	0	0	26	0	0	0	0	0	0	0	0	0	0	0	0	0	0	0	0	0	0	0	0	0	0	0	0	0	0	0	0
7dbc4080fe843f76995d2773a38a5b8f	3	0	0	0	0	0	0	0	0	0	0	0	0	7	0	0	0	0	2	3	0	0	0	0	0	4	7	0	0	0	0	0	0	0	0	0	0
6f3b80694f38f53ae3f0e560fffcaa6b	0	0	0	0	0	0	0	0	0	0	0	0	0	0	26	0	0	0	0	0	0	0	0	0	0	0	0	0	0	0	0	0	0	0	0	0	0
5f31732cbde5c8effc5ec3eaac003228	0	0	0	26	0	0	0	0	0	0	0	0	0	0	0	0	0	0	0	0	0	0	0	0	0	0	0	0	0	0	0	0	0	0	0	0	0
5e9ccbbcf1735da7df4aceb948f4ea6b	0	0	0	0	0	0	0	0	0	0	0	0	0	0	0	0	0	0	0	0	0	0	0	0	26	0	0	0	0	0	0	0	0	0	0	0	0
599ce596a9141349e98f8564be058311	0	0	0	0	0	0	0	0	26	0	0	0	0	0	0	0	0	0	0	0	0	0	0	0	0	0	0	0	0	0	0	0	0	0	0	0	0
57b59a4805ce8af5da788462b16f57de	0	0	0	0	0	0	0	0	0	26	0	0	0	0	0	0	0	0	0	0	0	0	0	0	0	0	0	0	0	0	0	0	0	0	0	0	0
4d38434db28b5f6cf928c2ba383ded78	0	0	0	0	0	0	0	0	0	26	0	0	0	0	0	0	0	0	0	0	0	0	0	0	0	0	0	0	0	0	0	0	0	0	0	0	0
496cbc9380170c4b6932562e284447dd	0	0	0	0	0	0	0	0	0	26	0	0	0	0	0	0	0	0	0	0	0	0	0	0	0	0	0	0	0	0	0	0	0	0	0	0	0
4254f0a459cd4ac583adee47f3082908	0	0	0	0	0	0	0	0	0	0	0	0	0	0	0	0	0	0	0	0	0	0	0	0	0	0	0	0	0	0	0	0	24	2	0	0	0
40dc2d14b3121a34de07bd4a3acdda4a	0	0	0	0	0	3	4	4	0	4	0	0	0	0	0	0	0	0	0	0	0	0	8	0	0	0	0	0	0	0	0	3	0	0	0	0	0
3d777e6ebf4c0c730d99e6e980398800	0	0	0	0	0	0	0	0	0	0	0	0	0	0	0	0	17	0	0	0	0	0	0	0	0	0	0	0	0	0	0	9	0	0	0	0	0
396d4e52986686878f090c34d57d0277	0	0	0	20	0	0	0	4	0	0	0	0	0	0	0	0	0	0	0	0	0	2	0	0	0	0	0	0	0	0	0	0	0	0	0	0	0
33e54c184c993a24a8a9cbd5a8f171ee	0	0	0	0	0	0	0	0	0	0	0	0	0	0	0	0	0	0	0	0	0	0	0	0	26	0	0	0	0	0	0	0	0	0	0	0	0
2f98c9fd6c4d000312ec539733f54b85	0	0	0	0	0	0	0	0	0	26	0	0	0	0	0	0	0	0	0	0	0	0	0	0	0	0	0	0	0	0	0	0	0	0	0	0	0
2bd681d2852a8df89eea202d81d16e9b	0	0	0	0	0	0	0	0	0	0	0	0	0	0	0	0	0	0	0	0	0	0	0	0	0	0	0	26	0	0	0	0	0	0	0	0	0
17432e7b662d45002ed1d7a8481e4c42	0	0	0	0	0	0	0	0	0	18	0	0	8	0	0	0	0	0	0	0	0	0	0	0	0	0	0	0	0	0	0	0	0	0	0	0	0
130a6fdeff27e42841a40e964a1b62cb	0	0	0	0	0	0	0	0	0	26	0	0	0	0	0	0	0	0	0	0	0	0	0	0	0	0	0	0	0	0	0	0	0	0	0	0	0
12642e6aaa8986e8500a302e87b3aa0f	0	0	0	0	0	0	0	26	0	0	0	0	0	0	0	0	0	0	0	0	0	0	0	0	0	0	0	0	0	0	0	0	0	0	0	0	0
10442aa92ce9f9b438782f254fd5938d	0	0	0	0	0	0	0	0	26	0	0	0	0	0	0	0	0	0	0	0	0	0	0	0	0	0	0	0	0	0	0	0	0	0	0	0	0
0e68f296c450f0e4b68b76758d53a149	0	0	0	0	0	0	0	0	0	26	0	0	0	0	0	0	0	0	0	0	0	0	0	0	0	0	0	0	0	0	0	0	0	0	0	0	0
0c8cbe4ebe95024400abcc75035497d4	0	0	0	0	0	26	0	0	0	0	0	0	0	0	0	0	0	0	0	0	0	0	0	0	0	0	0	0	0	0	0	0	0	0	0	0	0
0af93d05ff96b617f85c08ee98971031	0	0	0	0	0	0	0	0	0	0	0	0	0	0	0	0	26	0	0	0	0	0	0	0	0	0	0	0	0	0	0	0	0	0	0	0	0
056af618c3a5924c0a148c05a60d5a7e	0	26	0	0	0	0	0	0	0	0	0	0	0	0	0	0	0	0	0	0	0	0	0	0	0	0	0	0	0	0	0	0	0	0	0	0	0
fd5db6f640a446ebb9a315d075ff2294	0	0	0	0	0	0	0	0	0	0	0	0	0	0	0	0	0	0	0	0	0	0	0	0	0	0	0	0	0	17	0	8	0	0	0	0	0
f65818987f6d89960ddc805012525815	0	0	0	0	0	0	0	0	0	25	0	0	0	0	0	0	0	0	0	0	0	0	0	0	0	0	0	0	0	0	0	0	0	0	0	0	0
f27aa987d85bb2adc1a28169d06c4f67	0	0	0	0	0	0	0	0	0	0	0	0	0	18	0	0	0	0	0	0	0	0	0	0	0	0	0	0	0	0	0	0	0	7	0	0	0
f097364bc34cf6d93152d8c0c13ee6a4	25	0	0	0	0	0	0	0	0	0	0	0	0	0	0	0	0	0	0	0	0	0	0	0	0	0	0	0	0	0	0	0	0	0	0	0	0
edde4e5ae0ed341f8b610154b823cd1f	0	0	0	0	0	0	0	0	0	0	0	0	0	0	0	0	0	0	0	0	0	0	0	25	0	0	0	0	0	0	0	0	0	0	0	0	0
dc1ccb30f5e8cb7c73671b4bcead0435	0	0	0	0	0	0	0	0	0	0	0	0	0	0	0	0	0	0	0	0	0	0	0	0	0	0	25	0	0	0	0	0	0	0	0	0	0
d22a401c1302775e14c13683ab7ad4db	0	0	0	17	5	0	0	0	0	0	0	0	0	0	0	0	0	0	0	0	0	0	0	0	0	0	0	0	0	0	0	0	0	0	0	3	0
cc1b2e6096db2c7aac77922f436b9662	0	0	0	25	0	0	0	0	0	0	0	0	0	0	0	0	0	0	0	0	0	0	0	0	0	0	0	0	0	0	0	0	0	0	0	0	0
cb6e17150d6ca988c474eb2a84f7e039	0	0	0	0	0	0	0	25	0	0	0	0	0	0	0	0	0	0	0	0	0	0	0	0	0	0	0	0	0	0	0	0	0	0	0	0	0
cb5a4748061db8cd5bbf54432619f303	0	0	0	6	0	0	0	0	0	2	0	0	0	0	0	0	0	0	0	8	0	0	0	0	0	4	0	0	0	0	0	0	5	0	0	0	0
c75c408197204ace06e484a25720ed9e	0	0	0	0	0	0	0	0	0	0	0	25	0	0	0	0	0	0	0	0	0	0	0	0	0	0	0	0	0	0	0	0	0	0	0	0	0
b82ef7af7d56d6dc86c9fce842031cb9	0	8	0	0	0	0	0	0	0	0	0	0	0	0	0	0	0	0	0	0	0	0	0	0	5	0	0	0	0	6	0	6	0	0	0	0	0
ae6986ec67a912248615753fd616684a	0	0	0	0	0	0	0	0	0	0	0	0	0	0	0	0	0	0	0	0	0	0	0	0	25	0	0	0	0	0	0	0	0	0	0	0	0
a8fc219ab6d53ddbadb140e107e17e96	0	0	0	0	0	0	0	0	0	0	0	0	0	0	0	0	0	0	0	0	0	0	0	0	25	0	0	0	0	0	0	0	0	0	0	0	0
a80f8c7331d7824564c9327abfd29997	0	0	0	0	0	0	0	0	0	0	0	0	0	0	0	0	0	0	0	0	0	0	0	0	25	0	0	0	0	0	0	0	0	0	0	0	0
9fe0d956d52915beef693b30b0ff1429	0	0	0	0	0	0	0	0	0	0	25	0	0	0	0	0	0	0	0	0	0	0	0	0	0	0	0	0	0	0	0	0	0	0	0	0	0
9723426988e8310df16fd0b15b2a3547	0	0	0	0	0	0	0	0	0	25	0	0	0	0	0	0	0	0	0	0	0	0	0	0	0	0	0	0	0	0	0	0	0	0	0	0	0
96b31ea95268985a4bdaac07a21b5173	0	25	0	0	0	0	0	0	0	0	0	0	0	0	0	0	0	0	0	0	0	0	0	0	0	0	0	0	0	0	0	0	0	0	0	0	0
9271c8a33141f66dc8934759f1c3ad0d	0	0	0	0	0	0	0	0	25	0	0	0	0	0	0	0	0	0	0	0	0	0	0	0	0	0	0	0	0	0	0	0	0	0	0	0	0
8f7a8455770cdabada400f7a313f8866	0	0	0	0	0	0	0	0	0	0	0	4	0	0	0	0	0	0	0	0	0	0	0	0	0	0	16	0	0	0	5	0	0	0	0	0	0
8a42512f2291611696d532e5a42e0a60	0	0	0	0	0	0	0	25	0	0	0	0	0	0	0	0	0	0	0	0	0	0	0	0	0	0	0	0	0	0	0	0	0	0	0	0	0
89be5e1565c1ab3e37def2ed66586a45	25	0	0	0	0	0	0	0	0	0	0	0	0	0	0	0	0	0	0	0	0	0	0	0	0	0	0	0	0	0	0	0	0	0	0	0	0
74538bc272bd2ffa390d0856eb10fd12	0	0	0	25	0	0	0	0	0	0	0	0	0	0	0	0	0	0	0	0	0	0	0	0	0	0	0	0	0	0	0	0	0	0	0	0	0
6af61876151167c516081678b9d806d4	0	0	0	0	0	0	0	0	0	0	0	0	0	0	0	0	0	0	0	0	0	0	0	0	0	0	0	0	0	0	0	0	0	25	0	0	0
6a875e102299922ee69228ea98ecdc32	0	0	0	0	0	0	0	0	0	25	0	0	0	0	0	0	0	0	0	0	0	0	0	0	0	0	0	0	0	0	0	0	0	0	0	0	0
5c5e3ae64cb6efd89c34224c5c1b9c12	0	6	0	0	0	0	0	0	0	0	0	0	0	0	0	0	0	0	0	0	0	19	0	0	0	0	0	0	0	0	0	0	0	0	0	0	0
5b56dcac8fcabb30cc03a68c2d28f5ca	0	0	0	0	0	0	0	0	0	0	0	0	0	0	0	25	0	0	0	0	0	0	0	0	0	0	0	0	0	0	0	0	0	0	0	0	0
563fb0d2a5998a6d420989f524cca52f	0	25	0	0	0	0	0	0	0	0	0	0	0	0	0	0	0	0	0	0	0	0	0	0	0	0	0	0	0	0	0	0	0	0	0	0	0
551fca5b60bf232e3525ef8ed68619da	0	0	0	5	0	0	0	0	0	5	0	0	0	0	0	0	0	0	0	7	0	0	0	0	0	5	0	0	0	0	0	0	3	0	0	0	0
54d9abf6691cfa680ca9f00059d7c00d	0	0	0	0	0	0	0	0	0	25	0	0	0	0	0	0	0	0	0	0	0	0	0	0	0	0	0	0	0	0	0	0	0	0	0	0	0
4911880b8b6be7d17b9d183e6fd144ee	0	0	0	0	0	0	0	0	20	0	0	0	0	0	0	0	0	0	0	0	0	0	0	0	0	0	5	0	0	0	0	0	0	0	0	0	0
450d1356a79884e4250453141c166f96	0	0	0	0	0	0	0	0	0	25	0	0	0	0	0	0	0	0	0	0	0	0	0	0	0	0	0	0	0	0	0	0	0	0	0	0	0
317d0131927c60f8bfebb5fb1fbe6fa6	0	25	0	0	0	0	0	0	0	0	0	0	0	0	0	0	0	0	0	0	0	0	0	0	0	0	0	0	0	0	0	0	0	0	0	0	0
2cb4b8041d25a3806260717de72704dc	0	0	0	0	0	0	0	0	0	0	0	0	0	0	0	0	0	0	0	0	0	0	0	0	0	0	0	0	0	0	0	0	0	0	0	25	0
2644075166767a43bb017119cab98017	0	0	0	0	0	0	0	0	0	0	0	0	0	0	0	0	0	0	0	0	0	0	0	0	0	0	25	0	0	0	0	0	0	0	0	0	0
22f5cec9a919641d8441005557b5e54e	0	0	0	0	0	0	0	25	0	0	0	0	0	0	0	0	0	0	0	0	0	0	0	0	0	0	0	0	0	0	0	0	0	0	0	0	0
21c0633c3daf0d6d75fdc24224828438	0	16	0	0	0	0	0	0	0	0	0	0	0	0	0	0	0	0	0	0	0	0	0	5	0	0	0	0	0	0	4	0	0	0	0	0	0
1ee6184a8598318643e5fc3c845ad4ad	0	0	0	21	0	0	0	0	4	0	0	0	0	0	0	0	0	0	0	0	0	0	0	0	0	0	0	0	0	0	0	0	0	0	0	0	0
1c7c899abc51a831a386e3bbaac318be	0	0	0	0	0	0	0	0	0	0	0	0	0	0	0	0	0	0	0	0	0	0	0	0	0	0	0	0	0	0	18	7	0	0	0	0	0
1501f4b4e027b594983590447a22775a	0	0	0	0	0	0	0	0	0	0	0	0	0	0	0	0	0	0	0	0	0	0	0	25	0	0	0	0	0	0	0	0	0	0	0	0	0
0d3ec9d25b68d8008f1ffbced6eb57fd	0	0	0	0	0	0	0	0	0	25	0	0	0	0	0	0	0	0	0	0	0	0	0	0	0	0	0	0	0	0	0	0	0	0	0	0	0
fb05c4bf1efb85dfaba487dd398454aa	0	0	0	0	0	0	0	24	0	0	0	0	0	0	0	0	0	0	0	0	0	0	0	0	0	0	0	0	0	0	0	0	0	0	0	0	0
fa9ce36745ef152cfa8e0a96aba4a3ff	24	0	0	0	0	0	0	0	0	0	0	0	0	0	0	0	0	0	0	0	0	0	0	0	0	0	0	0	0	0	0	0	0	0	0	0	0
e862c90705778792ed53e244d9e846e6	0	0	0	0	0	0	0	0	0	24	0	0	0	0	0	0	0	0	0	0	0	0	0	0	0	0	0	0	0	0	0	0	0	0	0	0	0
e7f31decf4900f8ea582cc8bf47ac919	0	0	0	0	0	0	0	0	0	24	0	0	0	0	0	0	0	0	0	0	0	0	0	0	0	0	0	0	0	0	0	0	0	0	0	0	0
e4853b60904eb34a8c3d730cb1b3dfb8	0	0	0	0	0	0	0	0	0	0	0	0	0	0	0	0	16	0	0	0	0	0	0	0	0	0	0	0	0	0	0	0	0	0	8	0	0
e3d09938a2a3302cf2abb0c621c2584e	0	0	0	0	0	0	0	24	0	0	0	0	0	0	0	0	0	0	0	0	0	0	0	0	0	0	0	0	0	0	0	0	0	0	0	0	0
e2b0d9e7fc64098045385ce198bd4395	0	0	0	0	0	0	0	0	0	7	0	0	0	0	0	0	0	0	0	0	0	0	0	0	0	17	0	0	0	0	0	0	0	0	0	0	0
e29969071a2f7496d1ea157da258a14e	0	24	0	0	0	0	0	0	0	0	0	0	0	0	0	0	0	0	0	0	0	0	0	0	0	0	0	0	0	0	0	0	0	0	0	0	0
c0ecece7e1b298ae6eab6fef56c9c748	24	0	0	0	0	0	0	0	0	0	0	0	0	0	0	0	0	0	0	0	0	0	0	0	0	0	0	0	0	0	0	0	0	0	0	0	0
bc4b0967d49b9106794335aaf6deef37	0	0	0	0	0	0	0	0	0	0	0	0	0	2	0	0	0	0	0	0	0	0	0	0	0	6	0	0	0	0	0	0	0	16	0	0	0
b93b43b5b2df9ed675cd76b62c317c6b	0	0	0	0	0	0	0	0	0	24	0	0	0	0	0	0	0	0	0	0	0	0	0	0	0	0	0	0	0	0	0	0	0	0	0	0	0
b32f906990c8775a66b311b8eb3e2009	0	0	0	24	0	0	0	0	0	0	0	0	0	0	0	0	0	0	0	0	0	0	0	0	0	0	0	0	0	0	0	0	0	0	0	0	0
b12a0c004a26880d62d260a557579fe9	0	0	0	0	0	0	0	0	0	0	0	0	0	0	0	0	0	0	0	0	0	0	0	0	0	0	0	0	0	0	0	0	24	0	0	0	0
afd42e4f9ce7efa0b12a6ba29b999ab8	0	0	0	0	0	0	0	0	0	0	0	0	0	24	0	0	0	0	0	0	0	0	0	0	0	0	0	0	0	0	0	0	0	0	0	0	0
acccb4d20d270875f82212a83d223acb	0	0	0	0	0	0	0	24	0	0	0	0	0	0	0	0	0	0	0	0	0	0	0	0	0	0	0	0	0	0	0	0	0	0	0	0	0
a4ba5eb1e8c461df2ed4fa49f8bd0e1f	24	0	0	0	0	0	0	0	0	0	0	0	0	0	0	0	0	0	0	0	0	0	0	0	0	0	0	0	0	0	0	0	0	0	0	0	0
a45db4ad42972cf2a5ab926769cf1a63	24	0	0	0	0	0	0	0	0	0	0	0	0	0	0	0	0	0	0	0	0	0	0	0	0	0	0	0	0	0	0	0	0	0	0	0	0
a1da224d6d106ab500dac10b5a2f5380	0	0	0	0	0	0	0	0	0	0	0	0	0	0	0	24	0	0	0	0	0	0	0	0	0	0	0	0	0	0	0	0	0	0	0	0	0
9f0ee53fdb6e2f595417f6070586bbcb	0	0	0	0	0	0	0	0	0	24	0	0	0	0	0	0	0	0	0	0	0	0	0	0	0	0	0	0	0	0	0	0	0	0	0	0	0
81833506a9a9edfa4c389dd81f03df24	0	0	0	0	4	0	0	0	0	0	0	7	0	0	0	0	0	13	0	0	0	0	0	0	0	0	0	0	0	0	0	0	0	0	0	0	0
80809f99593ed52b7fadce506130c549	0	24	0	0	0	0	0	0	0	0	0	0	0	0	0	0	0	0	0	0	0	0	0	0	0	0	0	0	0	0	0	0	0	0	0	0	0
7e349676da0c6b0cbfedebfdc67c2125	0	0	0	24	0	0	0	0	0	0	0	0	0	0	0	0	0	0	0	0	0	0	0	0	0	0	0	0	0	0	0	0	0	0	0	0	0
7774f7f188f16f30b6a072ad283d4209	0	0	0	0	0	0	0	0	0	0	0	0	0	0	24	0	0	0	0	0	0	0	0	0	0	0	0	0	0	0	0	0	0	0	0	0	0
6069d1be3e2348cde1914935b9563884	0	0	0	0	0	0	0	0	0	24	0	0	0	0	0	0	0	0	0	0	0	0	0	0	0	0	0	0	0	0	0	0	0	0	0	0	0
5ae1c6e98dec3340a45b97cfa47155e8	0	0	0	0	0	0	0	0	0	24	0	0	0	0	0	0	0	0	0	0	0	0	0	0	0	0	0	0	0	0	0	0	0	0	0	0	0
525ebbcb421ea6dfbb6d92cfd39a6d53	0	0	0	0	24	0	0	0	0	0	0	0	0	0	0	0	0	0	0	0	0	0	0	0	0	0	0	0	0	0	0	0	0	0	0	0	0
41911fd757fc80710e8474f3b910be4d	0	0	0	0	0	0	0	0	0	24	0	0	0	0	0	0	0	0	0	0	0	0	0	0	0	0	0	0	0	0	0	0	0	0	0	0	0
3e04b21c2be0d3ac5afe3ed0921b3aa6	0	0	0	0	3	0	0	0	0	9	0	0	0	0	0	6	0	0	0	0	0	0	0	0	0	0	2	0	0	0	4	0	0	0	0	0	0
39f8ac5f593544e5594812b1c1319693	0	0	0	0	0	0	0	0	0	0	0	0	0	0	0	0	0	0	0	0	0	0	0	0	0	0	0	0	0	0	0	24	0	0	0	0	0
364783462063048140587fbfd07caf5c	24	0	0	0	0	0	0	0	0	0	0	0	0	0	0	0	0	0	0	0	0	0	0	0	0	0	0	0	0	0	0	0	0	0	0	0	0
3382aefd93507aa983b009a2dffb9942	0	0	0	0	0	0	0	0	0	24	0	0	0	0	0	0	0	0	0	0	0	0	0	0	0	0	0	0	0	0	0	0	0	0	0	0	0
307c59b28f58d8f448ee0c301d1611ea	0	0	0	0	0	0	0	0	0	0	0	0	0	0	0	0	0	0	0	0	0	0	0	0	24	0	0	0	0	0	0	0	0	0	0	0	0
2fc9a71072a040b5941ef167f472e50f	0	0	0	0	0	0	0	6	0	0	0	0	0	0	5	0	0	0	0	0	0	0	0	0	6	0	7	0	0	0	0	0	0	0	0	0	0
235291b17cd999da33ece4c68059c965	0	0	0	0	0	0	0	0	0	0	0	0	0	0	0	0	0	0	0	0	0	0	0	24	0	0	0	0	0	0	0	0	0	0	0	0	0
19e18c29285c17ec3f62190c7ae576cf	0	0	0	0	0	0	0	24	0	0	0	0	0	0	0	0	0	0	0	0	0	0	0	0	0	0	0	0	0	0	0	0	0	0	0	0	0
186c2b5b64e8c2341b4866ad722f0e8d	0	0	0	0	0	0	0	0	0	0	0	0	0	0	0	0	0	0	0	0	0	0	0	0	0	0	0	0	0	0	0	0	24	0	0	0	0
16f74dba45c6ebba0313e0518aaddb1f	0	0	0	0	0	0	0	0	0	0	0	0	0	0	0	0	0	0	0	0	0	0	0	0	15	9	0	0	0	0	0	0	0	0	0	0	0
1247759843d60399551362f044636a24	0	0	0	0	0	0	0	0	0	0	0	0	0	0	0	0	0	0	0	0	0	24	0	0	0	0	0	0	0	0	0	0	0	0	0	0	0
0f1de1f50c416e938e59fb5a82213a82	0	4	0	0	0	0	0	0	0	0	0	0	0	0	0	0	0	0	0	0	0	0	0	0	10	0	0	0	0	0	0	10	0	0	0	0	0
0ebecd6381d2f504322c3c3968803599	24	0	0	0	0	0	0	0	0	0	0	0	0	0	0	0	0	0	0	0	0	0	0	0	0	0	0	0	0	0	0	0	0	0	0	0	0
0dd788bb1b70625cfbe12eb6a511a19d	0	0	0	0	0	0	0	0	0	24	0	0	0	0	0	0	0	0	0	0	0	0	0	0	0	0	0	0	0	0	0	0	0	0	0	0	0
07a00100a5898b7c6cb00b8bbe510b04	0	0	0	0	0	0	0	0	0	0	0	0	0	0	0	0	0	0	0	0	0	0	0	0	0	0	0	24	0	0	0	0	0	0	0	0	0
f39c3e95ecce6dd7110d7440a1451a52	0	0	0	0	0	0	0	23	0	0	0	0	0	0	0	0	0	0	0	0	0	0	0	0	0	0	0	0	0	0	0	0	0	0	0	0	0
dac500da2ba0f47135605a7ee14fd1d2	0	0	0	0	0	0	0	0	0	0	23	0	0	0	0	0	0	0	0	0	0	0	0	0	0	0	0	0	0	0	0	0	0	0	0	0	0
c21e054d4f7638edbd22070d3f65e7e1	23	0	0	0	0	0	0	0	0	0	0	0	0	0	0	0	0	0	0	0	0	0	0	0	0	0	0	0	0	0	0	0	0	0	0	0	0
bbdd47be2c3810900b353b717f4e87f3	0	0	0	0	0	0	0	0	0	0	0	0	0	0	0	0	0	0	0	0	0	0	0	23	0	0	0	0	0	0	0	0	0	0	0	0	0
b08b5f34a8c577cfd4dbf71126632210	0	0	0	23	0	0	0	0	0	0	0	0	0	0	0	0	0	0	0	0	0	0	0	0	0	0	0	0	0	0	0	0	0	0	0	0	0
aeed83690a1b3d4b4426d602c0416243	0	0	0	0	0	0	0	0	4	0	0	0	0	0	3	0	0	3	0	0	0	0	0	8	0	0	0	0	0	0	3	0	0	0	0	2	0
aa2de3a681aa6316f421067880176e76	0	0	0	0	0	0	0	0	0	23	0	0	0	0	0	0	0	0	0	0	0	0	0	0	0	0	0	0	0	0	0	0	0	0	0	0	0
916d52a9dae7fad30e61b4ecc592cd01	0	0	0	0	0	0	0	0	0	23	0	0	0	0	0	0	0	0	0	0	0	0	0	0	0	0	0	0	0	0	0	0	0	0	0	0	0
8a1ffd20155b2675510e4088b1ff6dab	0	0	0	0	0	0	0	0	23	0	0	0	0	0	0	0	0	0	0	0	0	0	0	0	0	0	0	0	0	0	0	0	0	0	0	0	0
8318a735e81080be05411c830f1838ac	6	10	0	0	0	0	0	0	0	0	0	0	0	4	0	0	0	0	0	0	0	0	0	0	0	0	0	0	0	3	0	0	0	0	0	0	0
7ff082403b5fa850917e1b4908e31b0b	0	0	0	23	0	0	0	0	0	0	0	0	0	0	0	0	0	0	0	0	0	0	0	0	0	0	0	0	0	0	0	0	0	0	0	0	0
742bcaf6ef9e1e7e18451b272f6afac0	0	0	0	0	0	0	0	0	0	0	0	0	0	0	0	0	0	23	0	0	0	0	0	0	0	0	0	0	0	0	0	0	0	0	0	0	0
7105a765d6681c5d01e19a775a61d04b	0	0	0	23	0	0	0	0	0	0	0	0	0	0	0	0	0	0	0	0	0	0	0	0	0	0	0	0	0	0	0	0	0	0	0	0	0
6ec9b57ebfc05b3a81e9192fdb480a29	0	0	0	0	0	0	0	0	0	0	0	0	0	0	0	0	0	0	0	0	0	0	0	0	0	23	0	0	0	0	0	0	0	0	0	0	0
6c4544a55a4d58b143368a2334ccff0e	0	0	0	0	0	0	0	0	0	0	0	0	0	0	0	0	0	0	0	0	0	0	0	0	23	0	0	0	0	0	0	0	0	0	0	0	0
6a0ec056cdb8aba48246ca0fc6b196b0	0	0	0	0	0	0	0	0	0	0	0	0	0	0	0	0	0	0	0	0	0	0	0	0	23	0	0	0	0	0	0	0	0	0	0	0	0
669b1f305f8e3974fb4396c370b68593	0	0	0	0	0	0	0	0	0	0	0	0	0	0	0	0	0	0	0	0	0	0	0	0	0	0	0	0	0	0	0	0	23	0	0	0	0
5b5ad29c19134c5e31d765001b1969cc	0	0	0	0	23	0	0	0	0	0	0	0	0	0	0	0	0	0	0	0	0	0	0	0	0	0	0	0	0	0	0	0	0	0	0	0	0
588533b729a08c0b3075e10d51db43fb	0	0	0	0	0	0	0	0	0	0	0	0	0	14	0	0	0	0	0	0	0	0	0	9	0	0	0	0	0	0	0	0	0	0	0	0	0
56acb9c2986beb0415a4dacbfbd06bc0	0	0	0	0	4	0	0	0	0	0	0	0	0	0	4	0	8	0	0	0	0	2	0	0	0	0	0	0	0	0	2	0	0	0	0	3	0
544ade22799e534f17100163350b3b4d	0	0	0	23	0	0	0	0	0	0	0	0	0	0	0	0	0	0	0	0	0	0	0	0	0	0	0	0	0	0	0	0	0	0	0	0	0
52a274dd950268c2045952fab68282fb	0	0	0	0	0	0	0	19	0	0	0	0	0	0	0	0	0	0	0	0	0	0	0	0	0	0	0	0	0	0	0	0	4	0	0	0	0
4f29009598f2a6ed2707adaa200378d1	0	0	0	0	0	0	0	0	0	0	0	0	0	0	0	0	0	0	0	0	0	0	0	23	0	0	0	0	0	0	0	0	0	0	0	0	0
3cddc60c76de23725cf645aa12b7c4c5	0	0	0	0	0	0	0	0	0	0	0	0	0	0	0	0	0	0	0	0	0	0	0	0	23	0	0	0	0	0	0	0	0	0	0	0	0
27f377291204eb151696c37ac2113202	0	0	0	0	0	0	0	0	0	23	0	0	0	0	0	0	0	0	0	0	0	0	0	0	0	0	0	0	0	0	0	0	0	0	0	0	0
1fa6acbfc6f1cf689aab48cdcc532a6a	0	0	0	0	0	0	0	0	0	23	0	0	0	0	0	0	0	0	0	0	0	0	0	0	0	0	0	0	0	0	0	0	0	0	0	0	0
1b89ea97392cb38645bcea27869bffa5	23	0	0	0	0	0	0	0	0	0	0	0	0	0	0	0	0	0	0	0	0	0	0	0	0	0	0	0	0	0	0	0	0	0	0	0	0
148fb856c9159b687243c752234c4bc1	0	0	0	0	0	0	0	0	0	0	0	0	0	0	0	0	0	0	0	0	0	0	0	0	0	0	23	0	0	0	0	0	0	0	0	0	0
13a4d4be4fda25e901044afbca39866e	0	0	0	0	0	0	0	6	0	0	17	0	0	0	0	0	0	0	0	0	0	0	0	0	0	0	0	0	0	0	0	0	0	0	0	0	0
0ef7dbc343c53da3a018a603517b7f69	0	0	0	0	0	0	0	0	0	0	0	0	0	0	0	0	0	0	0	0	0	0	0	0	17	0	0	0	0	6	0	0	0	0	0	0	0
0c69e7e4454e4751fa9771549c6ac37b	0	0	0	3	0	3	2	0	0	2	0	0	3	0	0	0	0	3	0	0	0	0	0	0	2	3	0	0	0	0	2	0	0	0	0	0	0
0c2d42054ca089c73b2ff6834d865adf	0	0	0	0	0	0	0	0	0	0	0	0	0	0	0	0	0	0	0	0	0	0	0	0	0	0	0	0	0	23	0	0	0	0	0	0	0
034bbcbb0ef25c4b3435b7e7d9f632f6	0	0	0	0	0	0	0	0	0	0	0	0	0	0	23	0	0	0	0	0	0	0	0	0	0	0	0	0	0	0	0	0	0	0	0	0	0
fe77c3425c9c2cdabf505b8e32747c3c	0	0	0	0	0	0	0	0	0	22	0	0	0	0	0	0	0	0	0	0	0	0	0	0	0	0	0	0	0	0	0	0	0	0	0	0	0
eea985553d7b8e343626d5108d4145a8	0	0	0	0	0	0	0	0	0	0	0	0	0	0	0	0	0	0	0	0	0	0	0	0	22	0	0	0	0	0	0	0	0	0	0	0	0
e97b134cbf19f358f91758d7c0454bee	0	0	0	0	0	0	0	0	0	0	0	0	0	0	0	0	0	0	0	0	0	0	0	0	0	0	0	22	0	0	0	0	0	0	0	0	0
e7fe91c0cd3df4e7ea6f709e6c26a5c8	0	0	0	0	0	0	0	0	0	22	0	0	0	0	0	0	0	0	0	0	0	0	0	0	0	0	0	0	0	0	0	0	0	0	0	0	0
e26c31867f7a05c59a57afbeabf03cf6	0	0	0	0	0	0	0	0	0	0	0	0	0	0	0	0	0	5	0	0	0	0	0	0	0	0	0	0	0	0	17	0	0	0	0	0	0
dd017794bd7b78df0c1895899bc2cd6d	0	0	0	0	0	0	0	0	0	0	0	0	0	0	22	0	0	0	0	0	0	0	0	0	0	0	0	0	0	0	0	0	0	0	0	0	0
d4f38a15e69928006d9cd4d0337ebd5a	0	0	0	0	0	0	0	0	0	0	0	0	0	0	0	0	0	0	0	0	0	0	0	0	0	0	22	0	0	0	0	0	0	0	0	0	0
d3e61d408281f1442c73ce05648fa9eb	0	0	0	0	17	0	0	0	0	0	0	0	0	0	0	0	0	5	0	0	0	0	0	0	0	0	0	0	0	0	0	0	0	0	0	0	0
cd9a09c0125c025f0972da48c1aebc61	0	0	0	0	0	0	0	0	0	0	0	0	0	0	0	0	0	0	0	0	0	0	0	0	0	0	0	0	0	0	0	0	22	0	0	0	0
c54667bab45a84c41f24ea620c3b3c21	0	0	0	0	0	0	0	0	0	0	0	0	0	0	0	0	0	0	0	0	0	0	0	0	0	22	0	0	0	0	0	0	0	0	0	0	0
c3e04c37d14585735bdd7f5a97c91a57	0	0	0	0	0	0	0	0	0	0	0	0	0	0	0	0	0	0	0	0	0	0	0	0	0	0	0	0	0	2	0	20	0	0	0	0	0
bab86d99abbfe2c472bf8bfb1cf5e664	0	0	0	0	0	0	0	0	0	0	0	0	0	0	0	0	0	0	0	0	0	0	0	0	0	0	0	22	0	0	0	0	0	0	0	0	0
ba006406b65853ebaccc5767c1107781	0	0	0	0	0	0	0	0	0	0	0	0	0	0	0	0	0	0	0	0	0	0	0	0	22	0	0	0	0	0	0	0	0	0	0	0	0
b882c8f92806a5cceae079731fbdf3df	0	0	0	0	0	0	0	0	0	0	0	0	0	0	0	0	0	0	0	0	0	0	0	0	0	0	0	0	0	0	0	0	0	22	0	0	0
b851e9f5a232cd72a7e0b750d7340111	0	0	0	0	0	0	0	0	11	0	2	0	0	0	4	0	0	0	0	3	0	0	0	0	2	0	0	0	0	0	0	0	0	0	0	0	0
b352db23fa2dac152ecfa5a3d1484684	0	0	0	0	0	0	0	0	0	0	0	0	0	0	0	0	0	0	0	0	0	0	0	0	0	0	0	0	0	22	0	0	0	0	0	0	0
b05f5459e068b529b2c41e659efdef34	0	0	0	0	2	0	0	0	2	0	0	0	0	0	2	0	0	0	0	0	0	0	0	3	4	0	0	0	0	0	3	4	0	0	0	2	0
ab63fe99fb94a62ea331f9674ef6cebd	0	0	0	0	0	19	0	0	0	0	0	0	0	0	0	0	0	0	0	0	0	0	0	0	0	0	3	0	0	0	0	0	0	0	0	0	0
a5df66b545b50eaa1c428f6805bcae7f	0	0	0	0	0	0	0	0	10	0	0	0	0	0	0	0	0	0	0	0	0	0	0	0	0	12	0	0	0	0	0	0	0	0	0	0	0
a4f40a82f92a6974f2476810e6d38d07	22	0	0	0	0	0	0	0	0	0	0	0	0	0	0	0	0	0	0	0	0	0	0	0	0	0	0	0	0	0	0	0	0	0	0	0	0
a4913407918cd0ade7069266bd530ee3	0	0	0	7	0	0	0	0	0	0	0	0	0	0	0	0	0	0	0	6	0	0	0	0	0	9	0	0	0	0	0	0	0	0	0	0	0
a07cbe5e1b0c2aac44cd19ca99dac400	0	0	0	0	0	0	0	0	0	0	22	0	0	0	0	0	0	0	0	0	0	0	0	0	0	0	0	0	0	0	0	0	0	0	0	0	0
9e59d40cd41fb66d607bbdab4af54172	0	0	0	0	0	0	0	0	0	0	0	0	0	0	0	0	22	0	0	0	0	0	0	0	0	0	0	0	0	0	0	0	0	0	0	0	0
917cb795fe3042f55aed7ed39745d0ea	0	0	0	0	0	0	0	0	0	0	0	0	0	0	0	0	0	0	0	0	0	0	0	0	0	0	0	0	0	0	0	0	0	22	0	0	0
903ddb6cab78964363f5261dbfbf06f7	0	22	0	0	0	0	0	0	0	0	0	0	0	0	0	0	0	0	0	0	0	0	0	0	0	0	0	0	0	0	0	0	0	0	0	0	0
890cdb4c15a68515d9320614b6deab06	0	0	0	0	0	0	0	0	13	0	0	0	0	0	0	0	0	0	0	0	0	9	0	0	0	0	0	0	0	0	0	0	0	0	0	0	0
8441162dd5e5e8fd330e6d0c2e76ddd8	0	0	0	0	0	0	0	0	0	0	0	0	0	0	22	0	0	0	0	0	0	0	0	0	0	0	0	0	0	0	0	0	0	0	0	0	0
7c2b07ed85e4fbd57ba514ad0f9f39d1	0	0	0	0	0	0	0	0	0	22	0	0	0	0	0	0	0	0	0	0	0	0	0	0	0	0	0	0	0	0	0	0	0	0	0	0	0
788e70212d435676b09c5cdb94db2eb1	0	0	0	22	0	0	0	0	0	0	0	0	0	0	0	0	0	0	0	0	0	0	0	0	0	0	0	0	0	0	0	0	0	0	0	0	0
7164c542ddf0be560f50d4181868550d	0	0	0	0	0	0	0	0	0	22	0	0	0	0	0	0	0	0	0	0	0	0	0	0	0	0	0	0	0	0	0	0	0	0	0	0	0
56e602326ae31a7831e2740bf32e262c	0	0	0	0	0	0	0	0	0	0	0	0	0	0	0	0	0	0	0	0	0	0	0	0	0	0	0	0	0	0	0	22	0	0	0	0	0
5004e62c943790d1b788ac1bd7a8adb6	0	0	0	0	0	0	0	0	0	0	0	0	0	22	0	0	0	0	0	0	0	0	0	0	0	0	0	0	0	0	0	0	0	0	0	0	0
45b88e187987f92ec58a88d049cc582e	0	0	11	0	0	0	0	0	0	0	0	0	0	0	11	0	0	0	0	0	0	0	0	0	0	0	0	0	0	0	0	0	0	0	0	0	0
3da4aa8c48c6c79aa43df7a38464aae7	0	0	0	0	0	0	0	0	9	0	0	0	0	0	0	0	0	0	0	0	0	0	0	3	0	0	0	0	0	0	7	0	0	0	0	3	0
37be4672b7d874ee527a8f58f5e2d47d	0	0	0	0	0	0	0	0	0	22	0	0	0	0	0	0	0	0	0	0	0	0	0	0	0	0	0	0	0	0	0	0	0	0	0	0	0
30d03193dcdfd64b435c0461d60647de	0	0	0	0	0	0	0	0	0	0	0	0	0	0	0	0	0	0	0	0	0	0	0	0	0	0	0	0	0	0	0	0	0	22	0	0	0
214e43e18b5551d6986c99fbf59f76c5	22	0	0	0	0	0	0	0	0	0	0	0	0	0	0	0	0	0	0	0	0	0	0	0	0	0	0	0	0	0	0	0	0	0	0	0	0
19d5557fd6cb1445ac151d35a837508b	22	0	0	0	0	0	0	0	0	0	0	0	0	0	0	0	0	0	0	0	0	0	0	0	0	0	0	0	0	0	0	0	0	0	0	0	0
17bfee77e82c97b78968ddab3b2fbdba	0	0	0	0	0	0	0	0	0	22	0	0	0	0	0	0	0	0	0	0	0	0	0	0	0	0	0	0	0	0	0	0	0	0	0	0	0
171aa2477f4734c13024e2f2e1213296	0	0	0	0	0	0	0	0	0	0	0	0	0	0	0	0	0	0	0	0	0	0	0	0	0	0	0	0	0	0	0	0	0	22	0	0	0
1079828a002b1b36915dd24b20892960	0	0	0	20	0	0	0	0	0	0	0	0	0	0	0	0	0	2	0	0	0	0	0	0	0	0	0	0	0	0	0	0	0	0	0	0	0
0f6477457dac65f10c4ea0592074a010	0	0	0	0	0	0	0	0	0	0	0	0	0	0	0	0	0	0	0	0	0	0	0	0	0	0	0	0	0	0	0	0	22	0	0	0	0
09df841350993f78b3b87688b7b0a142	0	0	0	0	0	0	0	0	0	0	0	0	0	0	0	0	0	0	0	0	0	0	0	0	0	0	0	0	0	0	22	0	0	0	0	0	0
fb205c0dd9fb89e41255b8918d7f1270	0	8	0	0	0	0	0	0	0	0	0	0	0	0	0	0	0	0	0	0	0	0	0	0	0	0	0	0	0	0	0	13	0	0	0	0	0
f72ea3cd46c720b071b79916607c8ef2	0	0	0	0	10	0	0	0	7	0	0	0	0	0	0	0	0	0	0	0	0	0	0	0	4	0	0	0	0	0	0	0	0	0	0	0	0
ec4d062df9ee9ec067945a3cfaf8d0b0	0	0	0	0	0	0	0	0	21	0	0	0	0	0	0	0	0	0	0	0	0	0	0	0	0	0	0	0	0	0	0	0	0	0	0	0	0
e31cb2c281629b4693f3040199c41bcc	21	0	0	0	0	0	0	0	0	0	0	0	0	0	0	0	0	0	0	0	0	0	0	0	0	0	0	0	0	0	0	0	0	0	0	0	0
dbf4279b9fe37862fb9308a3d92d659d	0	0	0	0	0	0	0	0	0	0	0	0	0	0	0	0	0	0	0	0	0	0	0	0	0	0	0	21	0	0	0	0	0	0	0	0	0
d967be695208782d9d92052db9b66fa0	0	21	0	0	0	0	0	0	0	0	0	0	0	0	0	0	0	0	0	0	0	0	0	0	0	0	0	0	0	0	0	0	0	0	0	0	0
d8b1e227549356e42419738fa3a7d047	0	0	0	0	0	0	0	0	21	0	0	0	0	0	0	0	0	0	0	0	0	0	0	0	0	0	0	0	0	0	0	0	0	0	0	0	0
bb017a5dafe2bf0bac7a48fffca563c5	0	0	0	0	0	0	0	0	0	0	0	0	0	0	0	0	0	0	0	0	0	21	0	0	0	0	0	0	0	0	0	0	0	0	0	0	0
b9be209af93a5dba20bd9ca105545e1d	21	0	0	0	0	0	0	0	0	0	0	0	0	0	0	0	0	0	0	0	0	0	0	0	0	0	0	0	0	0	0	0	0	0	0	0	0
b457aed8c7fb5f65b151b5c7f71cc342	0	0	0	0	0	0	0	0	0	21	0	0	0	0	0	0	0	0	0	0	0	0	0	0	0	0	0	0	0	0	0	0	0	0	0	0	0
a54a59a11ca1f605b5c98bf5ea5e609d	0	0	0	0	0	0	0	0	0	21	0	0	0	0	0	0	0	0	0	0	0	0	0	0	0	0	0	0	0	0	0	0	0	0	0	0	0
99ccd35734c829a113e00d0c46a10238	0	0	0	21	0	0	0	0	0	0	0	0	0	0	0	0	0	0	0	0	0	0	0	0	0	0	0	0	0	0	0	0	0	0	0	0	0
971b3eb76ed8d6359167616cfc8ebccb	21	0	0	0	0	0	0	0	0	0	0	0	0	0	0	0	0	0	0	0	0	0	0	0	0	0	0	0	0	0	0	0	0	0	0	0	0
86ff1565a54606a83f92bc72804d04a8	0	0	0	0	0	0	0	17	0	0	0	0	0	0	4	0	0	0	0	0	0	0	0	0	0	0	0	0	0	0	0	0	0	0	0	0	0
8495e7cf10c2575c3133970da7add210	0	0	0	0	0	0	0	0	0	0	0	0	0	0	0	0	0	0	0	0	0	0	0	0	0	0	0	0	0	0	0	0	0	0	0	0	21
82a5abce3ed399a7393f984f3f35c7e9	0	0	0	0	15	0	0	4	0	0	0	0	0	0	2	0	0	0	0	0	0	0	0	0	0	0	0	0	0	0	0	0	0	0	0	0	0
7adf954d1c0aa695983827cdd9b7fb0b	0	0	0	0	0	0	0	0	0	0	0	0	0	0	0	0	0	0	0	0	0	0	0	0	8	0	0	4	0	0	0	0	0	0	9	0	0
79862735b2bccfa3fd29c63d044f0336	0	0	0	0	15	0	0	0	0	0	0	0	0	6	0	0	0	0	0	0	0	0	0	0	0	0	0	0	0	0	0	0	0	0	0	0	0
72114b4894b9493163b4456497dd114d	0	0	0	0	0	0	0	0	0	21	0	0	0	0	0	0	0	0	0	0	0	0	0	0	0	0	0	0	0	0	0	0	0	0	0	0	0
6ee835fb8db08b12461563ccec50f58a	0	0	0	0	0	0	0	0	0	0	0	0	0	0	0	0	0	0	0	0	0	0	0	0	0	0	21	0	0	0	0	0	0	0	0	0	0
6d58f6dc00427656efc493484096d9a0	0	0	0	0	0	0	0	0	0	0	0	0	0	0	21	0	0	0	0	0	0	0	0	0	0	0	0	0	0	0	0	0	0	0	0	0	0
6d0e6dc94b919399e04fc809fc6ad601	0	0	0	21	0	0	0	0	0	0	0	0	0	0	0	0	0	0	0	0	0	0	0	0	0	0	0	0	0	0	0	0	0	0	0	0	0
5b1716018a973bb57aaf9b9386d24fc9	0	0	0	0	0	0	0	3	0	0	0	2	0	0	2	0	0	0	0	0	0	2	0	0	0	0	0	3	0	0	5	4	0	0	0	0	0
5584d69a1c0378da1d5f444ff4b8497b	0	0	0	0	0	0	0	0	0	0	0	0	0	0	0	0	0	0	0	0	0	0	0	21	0	0	0	0	0	0	0	0	0	0	0	0	0
54cefd8797661aeeabf3150f3ca6e501	0	0	0	0	0	0	0	0	0	21	0	0	0	0	0	0	0	0	0	0	0	0	0	0	0	0	0	0	0	0	0	0	0	0	0	0	0
5411fc3fb812c8e9fbd1aafcb3c3d2e7	21	0	0	0	0	0	0	0	0	0	0	0	0	0	0	0	0	0	0	0	0	0	0	0	0	0	0	0	0	0	0	0	0	0	0	0	0
334a4ea354c56e8d3950fbd2d98259f0	0	21	0	0	0	0	0	0	0	0	0	0	0	0	0	0	0	0	0	0	0	0	0	0	0	0	0	0	0	0	0	0	0	0	0	0	0
2c9953946207b3fd08f1ecf7ea400c50	0	0	0	0	0	0	0	0	0	0	0	0	0	0	0	0	0	0	0	0	12	0	0	0	0	0	0	0	0	9	0	0	0	0	0	0	0
2b06fe4e7dd44af9e78c907f1516cb00	0	0	0	0	0	21	0	0	0	0	0	0	0	0	0	0	0	0	0	0	0	0	0	0	0	0	0	0	0	0	0	0	0	0	0	0	0
25d26fcc214e69ca2ce36fe6a54c9f83	0	0	0	0	0	0	0	0	0	21	0	0	0	0	0	0	0	0	0	0	0	0	0	0	0	0	0	0	0	0	0	0	0	0	0	0	0
252e05b4e9017e8272b1c620505300a9	21	0	0	0	0	0	0	0	0	0	0	0	0	0	0	0	0	0	0	0	0	0	0	0	0	0	0	0	0	0	0	0	0	0	0	0	0
24c3395cd0960801be2dc4da6ac3dab5	0	0	0	0	0	0	0	0	0	0	0	0	0	0	0	0	0	0	0	0	0	0	0	0	0	0	0	0	0	0	21	0	0	0	0	0	0
1d107e507616f432bddcb2d0e1649b10	0	0	0	0	0	0	0	0	0	0	0	0	0	0	0	0	0	0	0	0	0	0	0	0	0	0	12	0	0	0	0	9	0	0	0	0	0
19a6cc50024a35dd0622a9bcfeb30498	0	0	0	0	0	0	0	0	0	0	21	0	0	0	0	0	0	0	0	0	0	0	0	0	0	0	0	0	0	0	0	0	0	0	0	0	0
15b1722586d10bddeda136dfb3297eae	0	0	0	0	0	0	0	0	0	0	0	0	0	0	21	0	0	0	0	0	0	0	0	0	0	0	0	0	0	0	0	0	0	0	0	0	0
0ff86f8305483edec19d35eae98bcffc	0	0	0	0	0	0	0	0	5	5	0	0	0	0	0	0	0	0	0	0	0	0	0	0	3	2	0	0	0	0	0	2	4	0	0	0	0
0dbc73bf8267711a421f110a28b6e7db	0	0	0	0	0	0	0	0	0	0	0	0	0	0	0	0	0	0	0	0	0	0	0	21	0	0	0	0	0	0	0	0	0	0	0	0	0
fbbfeba3bff13ead7767565114869d60	0	0	0	0	0	0	0	0	0	0	0	0	0	0	0	0	0	0	0	0	0	0	0	20	0	0	0	0	0	0	0	0	0	0	0	0	0
f910af005d39fe412637431331bcc421	0	0	0	20	0	0	0	0	0	0	0	0	0	0	0	0	0	0	0	0	0	0	0	0	0	0	0	0	0	0	0	0	0	0	0	0	0
f6b662b4000eae8cf4c4652e19e8ea78	0	0	0	0	0	0	0	0	20	0	0	0	0	0	0	0	0	0	0	0	0	0	0	0	0	0	0	0	0	0	0	0	0	0	0	0	0
f14c9059e50aac70509d52816b24f0ce	0	0	0	0	0	0	0	0	0	20	0	0	0	0	0	0	0	0	0	0	0	0	0	0	0	0	0	0	0	0	0	0	0	0	0	0	0
edbb138e53c16cc72fa789eef27e8a62	0	0	0	0	0	0	0	20	0	0	0	0	0	0	0	0	0	0	0	0	0	0	0	0	0	0	0	0	0	0	0	0	0	0	0	0	0
e7a7d6e58341c2e3acfe40c69c2ec556	0	0	0	0	0	0	0	0	0	0	0	0	0	0	20	0	0	0	0	0	0	0	0	0	0	0	0	0	0	0	0	0	0	0	0	0	0
ca6f4515cef7a0c3e5b3ecad2f8180df	0	0	0	0	0	0	0	0	0	0	0	0	0	0	0	0	0	0	0	0	0	0	0	0	0	0	0	0	0	0	20	0	0	0	0	0	0
c9678a7d1bb5cd4b0bbb570efdf1df06	0	20	0	0	0	0	0	0	0	0	0	0	0	0	0	0	0	0	0	0	0	0	0	0	0	0	0	0	0	0	0	0	0	0	0	0	0
c309e892045ea471690ab4b7a0ca3a64	20	0	0	0	0	0	0	0	0	0	0	0	0	0	0	0	0	0	0	0	0	0	0	0	0	0	0	0	0	0	0	0	0	0	0	0	0
b85e8f131cac4d46be00d8874a8d9f89	0	0	0	0	0	0	0	0	0	0	0	0	0	0	0	0	0	0	0	0	0	0	0	20	0	0	0	0	0	0	0	0	0	0	0	0	0
b435263fc0b3f7a60fd39bf310973125	0	0	0	0	0	0	0	0	0	0	0	0	0	0	0	0	0	20	0	0	0	0	0	0	0	0	0	0	0	0	0	0	0	0	0	0	0
b417841921e3cf8467564c1a487638df	0	0	0	0	0	0	0	0	0	0	0	8	0	0	0	0	0	0	0	0	0	0	0	0	0	0	0	0	0	12	0	0	0	0	0	0	0
a750b4e4c7cc063536c2a4d788cb034b	0	0	0	0	0	0	0	0	0	0	0	0	0	0	20	0	0	0	0	0	0	0	0	0	0	0	0	0	0	0	0	0	0	0	0	0	0
a6fb4be3220d1e86708836f302fd2e5c	0	0	0	0	0	0	0	0	0	0	0	0	0	20	0	0	0	0	0	0	0	0	0	0	0	0	0	0	0	0	0	0	0	0	0	0	0
9a0c02dee7c86a685909f66a148ce0e4	0	0	0	0	0	0	3	0	0	0	0	0	0	0	17	0	0	0	0	0	0	0	0	0	0	0	0	0	0	0	0	0	0	0	0	0	0
99caeac5291909844289719f124f178e	0	0	0	0	0	0	0	0	20	0	0	0	0	0	0	0	0	0	0	0	0	0	0	0	0	0	0	0	0	0	0	0	0	0	0	0	0
99c90e17cbdb13975631954a1db3573a	0	20	0	0	0	0	0	0	0	0	0	0	0	0	0	0	0	0	0	0	0	0	0	0	0	0	0	0	0	0	0	0	0	0	0	0	0
98cedaeb6530038a7c03909a8fffac4d	0	0	0	8	2	0	0	0	0	0	0	6	0	0	0	0	0	0	0	0	0	0	0	0	0	0	4	0	0	0	0	0	0	0	0	0	0
978d637595f775c1c20272dc111ae152	0	0	0	0	0	0	0	0	8	0	0	0	0	0	0	0	0	0	0	0	0	0	0	0	0	0	12	0	0	0	0	0	0	0	0	0	0
854cdada881744038e073d899b0b0d52	0	0	0	0	0	0	0	0	0	0	0	0	0	0	0	0	0	0	0	0	0	0	0	0	0	0	0	0	2	0	0	3	0	0	15	0	0
81dc2c5badc15ac7a7a0f9804f0649aa	0	20	0	0	0	0	0	0	0	0	0	0	0	0	0	0	0	0	0	0	0	0	0	0	0	0	0	0	0	0	0	0	0	0	0	0	0
810b292db067e4268d2041f75ec283e5	0	8	0	0	0	0	0	0	0	0	0	0	0	0	0	0	0	0	0	12	0	0	0	0	0	0	0	0	0	0	0	0	0	0	0	0	0
763b6677c9381b4d162f5541912369d6	0	20	0	0	0	0	0	0	0	0	0	0	0	0	0	0	0	0	0	0	0	0	0	0	0	0	0	0	0	0	0	0	0	0	0	0	0
6f1f2e36e00913a53087122d71cc996f	0	0	0	0	0	0	0	0	0	0	0	0	0	0	20	0	0	0	0	0	0	0	0	0	0	0	0	0	0	0	0	0	0	0	0	0	0
6ac562fd79376e0b1007e1ac697e0394	0	0	0	0	0	0	0	0	0	0	0	0	0	0	0	0	0	0	0	0	0	20	0	0	0	0	0	0	0	0	0	0	0	0	0	0	0
603b8d1c391c6bcc6e8cef51b2e6a5dc	0	0	0	0	0	0	0	0	0	0	0	0	0	0	0	0	0	0	0	0	0	0	0	0	0	0	0	0	0	0	0	0	0	0	0	0	20
542cac25f5abd962636f077544da7f7b	20	0	0	0	0	0	0	0	0	0	0	0	0	0	0	0	0	0	0	0	0	0	0	0	0	0	0	0	0	0	0	0	0	0	0	0	0
4e59ffa4f04df93e68b984020d7aae3a	0	0	0	0	0	0	0	0	0	20	0	0	0	0	0	0	0	0	0	0	0	0	0	0	0	0	0	0	0	0	0	0	0	0	0	0	0
4ba306336aa95e7c9a4d3b54e0f83b27	0	0	0	0	0	0	0	0	6	0	0	0	0	0	0	0	0	0	0	0	0	0	0	0	0	0	8	0	0	0	0	0	0	6	0	0	0
43613a06a942c3f931cba46483f3ec99	0	0	0	0	0	0	0	0	0	0	0	0	0	0	0	0	0	0	0	0	0	0	0	0	0	0	0	0	0	0	20	0	0	0	0	0	0
3d15df159e7239bfb169ab25a4654b38	20	0	0	0	0	0	0	0	0	0	0	0	0	0	0	0	0	0	0	0	0	0	0	0	0	0	0	0	0	0	0	0	0	0	0	0	0
35492d72306157da2b7634042f9bed5e	0	0	0	0	0	0	0	0	20	0	0	0	0	0	0	0	0	0	0	0	0	0	0	0	0	0	0	0	0	0	0	0	0	0	0	0	0
33c852914bda627ce6d2397024e64f2f	0	0	0	0	0	20	0	0	0	0	0	0	0	0	0	0	0	0	0	0	0	0	0	0	0	0	0	0	0	0	0	0	0	0	0	0	0
30a7120486cca1e0ffc8e20884c5960b	0	0	0	0	0	0	0	0	0	0	0	0	0	20	0	0	0	0	0	0	0	0	0	0	0	0	0	0	0	0	0	0	0	0	0	0	0
2e51fbc2e78cb03b716d620b9f1661a6	0	0	0	18	0	0	0	0	0	0	0	0	0	0	0	0	0	0	0	0	0	0	0	0	0	0	0	0	0	0	2	0	0	0	0	0	0
2c35d3603d7eba6c3a52b69b798f1b38	0	20	0	0	0	0	0	0	0	0	0	0	0	0	0	0	0	0	0	0	0	0	0	0	0	0	0	0	0	0	0	0	0	0	0	0	0
2bce3fb6f9a5169c970998ef1a923eed	0	0	0	0	0	0	0	0	0	0	0	0	0	0	0	0	7	0	0	0	0	0	0	0	0	0	0	0	0	0	8	5	0	0	0	0	0
291eb36cb8c0bf00be38f3bfe3cac8a6	0	0	0	0	0	0	0	0	0	0	0	0	0	0	0	0	0	0	0	0	0	20	0	0	0	0	0	0	0	0	0	0	0	0	0	0	0
28d3d88a7afa4f3af26d93c8c7a32228	0	0	0	20	0	0	0	0	0	0	0	0	0	0	0	0	0	0	0	0	0	0	0	0	0	0	0	0	0	0	0	0	0	0	0	0	0
2596af2890f18311e87226b52a8cc098	0	0	0	0	10	0	0	0	0	0	0	0	0	0	0	0	0	0	0	0	0	0	0	0	0	0	10	0	0	0	0	0	0	0	0	0	0
25919889a32dfab7109f2987625870ea	0	0	0	6	0	0	5	0	0	0	0	0	0	0	0	0	0	0	0	0	0	0	0	0	3	3	0	0	0	0	0	0	0	0	3	0	0
205af9628b212a192e44ddf84fd6046d	0	0	0	0	0	0	0	0	20	0	0	0	0	0	0	0	0	0	0	0	0	0	0	0	0	0	0	0	0	0	0	0	0	0	0	0	0
12ddced6bcb83a8e3f9069dc280e6c60	0	0	0	0	0	0	0	0	0	0	0	0	0	0	0	0	0	0	0	0	0	0	0	0	0	15	0	0	0	0	0	0	0	5	0	0	0
11f6bf86ef155c0bcecfe877d85ad4e5	0	20	0	0	0	0	0	0	0	0	0	0	0	0	0	0	0	0	0	0	0	0	0	0	0	0	0	0	0	0	0	0	0	0	0	0	0
0f7a91062d490725dee2a2664f7b2ce8	0	0	0	0	0	0	0	0	0	0	20	0	0	0	0	0	0	0	0	0	0	0	0	0	0	0	0	0	0	0	0	0	0	0	0	0	0
07ea817d672b99e3a155ab91e52fc732	0	0	0	0	0	0	0	0	0	20	0	0	0	0	0	0	0	0	0	0	0	0	0	0	0	0	0	0	0	0	0	0	0	0	0	0	0
0266f5511bd1fdbbaf5ec3d80ea6b2af	0	0	0	0	0	0	0	0	0	20	0	0	0	0	0	0	0	0	0	0	0	0	0	0	0	0	0	0	0	0	0	0	0	0	0	0	0
ff90c76906813ccada635e5b4556bffd	0	0	0	0	0	0	0	0	6	0	0	4	0	0	0	0	0	0	0	0	0	0	0	0	0	0	9	0	0	0	0	0	0	0	0	0	0
f99324a3731cabc9ff0bfb0ede34ff1b	0	4	0	0	0	0	0	0	0	0	0	0	0	0	0	0	0	0	0	0	0	0	0	0	0	0	0	0	0	15	0	0	0	0	0	0	0
ee7159344f68ee26a6226a6f645e1b4c	0	0	0	0	0	0	0	0	0	0	0	0	0	0	0	0	0	0	0	0	0	0	0	0	0	0	0	0	0	0	19	0	0	0	0	0	0
e747f4b4477f4a6f89cdacce27087385	0	0	0	0	0	0	0	3	0	0	0	0	0	0	3	0	0	0	0	0	0	0	0	0	0	0	13	0	0	0	0	0	0	0	0	0	0
d4692b7fa7b41427eab8ed68af83f726	0	0	0	19	0	0	0	0	0	0	0	0	0	0	0	0	0	0	0	0	0	0	0	0	0	0	0	0	0	0	0	0	0	0	0	0	0
d40a3abc91f38ed1de40f97eac7c003d	0	0	0	0	0	0	0	0	0	0	0	0	0	0	0	0	0	0	0	0	19	0	0	0	0	0	0	0	0	0	0	0	0	0	0	0	0
cabb5d06095afa5f7aaa610ff1f9e31d	0	0	0	0	0	0	0	0	19	0	0	0	0	0	0	0	0	0	0	0	0	0	0	0	0	0	0	0	0	0	0	0	0	0	0	0	0
bfe8aec70fd81afec2b45d224bd51798	0	19	0	0	0	0	0	0	0	0	0	0	0	0	0	0	0	0	0	0	0	0	0	0	0	0	0	0	0	0	0	0	0	0	0	0	0
bbb4c2e08ece6b986cc8746d44ae97e9	19	0	0	0	0	0	0	0	0	0	0	0	0	0	0	0	0	0	0	0	0	0	0	0	0	0	0	0	0	0	0	0	0	0	0	0	0
ba131f22b25646c1c4394419c6c99ea3	0	0	0	0	0	0	0	0	19	0	0	0	0	0	0	0	0	0	0	0	0	0	0	0	0	0	0	0	0	0	0	0	0	0	0	0	0
b0089bed99d561bee1d274d61a49a643	0	10	0	0	0	0	0	0	0	0	0	0	0	0	0	0	0	0	0	0	0	0	0	0	9	0	0	0	0	0	0	0	0	0	0	0	0
a7d77ba5c76d6fc7e467a73a38f69f2c	0	0	0	0	0	0	0	0	0	0	19	0	0	0	0	0	0	0	0	0	0	0	0	0	0	0	0	0	0	0	0	0	0	0	0	0	0
a7c6d2d245269cbdab3198a975cd8618	0	0	0	0	0	0	0	19	0	0	0	0	0	0	0	0	0	0	0	0	0	0	0	0	0	0	0	0	0	0	0	0	0	0	0	0	0
a4153adbe09ff6d4db9133bcfcbf4858	0	0	0	0	0	0	0	0	0	0	0	0	0	0	0	0	0	0	0	0	0	0	0	0	0	0	0	0	0	0	0	0	0	19	0	0	0
a282c570e17856e865063cbd8dc46828	0	0	0	0	0	0	0	0	0	0	0	0	0	0	0	0	0	0	0	0	0	0	0	0	0	0	0	19	0	0	0	0	0	0	0	0	0
a238143dafad8225fe052f9f838595cb	0	0	0	0	0	0	0	0	0	19	0	0	0	0	0	0	0	0	0	0	0	0	0	0	0	0	0	0	0	0	0	0	0	0	0	0	0
942620aa66288447316f17906badc075	0	19	0	0	0	0	0	0	0	0	0	0	0	0	0	0	0	0	0	0	0	0	0	0	0	0	0	0	0	0	0	0	0	0	0	0	0
8f533154597ea4504083db7b4e13535a	19	0	0	0	0	0	0	0	0	0	0	0	0	0	0	0	0	0	0	0	0	0	0	0	0	0	0	0	0	0	0	0	0	0	0	0	0
8c3e4a93d8745ce2929db798505520ee	0	0	0	0	0	0	0	0	0	19	0	0	0	0	0	0	0	0	0	0	0	0	0	0	0	0	0	0	0	0	0	0	0	0	0	0	0
8a4b57f16848fb4da4059696c82cc4f3	0	0	0	0	19	0	0	0	0	0	0	0	0	0	0	0	0	0	0	0	0	0	0	0	0	0	0	0	0	0	0	0	0	0	0	0	0
806d7e21bd923569e060cb695b050101	0	0	0	0	0	0	0	0	0	19	0	0	0	0	0	0	0	0	0	0	0	0	0	0	0	0	0	0	0	0	0	0	0	0	0	0	0
7a6d0cc02242faff21fec8424043e9cf	0	0	0	0	0	0	0	0	4	0	0	0	0	0	0	0	0	0	0	0	0	0	0	0	15	0	0	0	0	0	0	0	0	0	0	0	0
5d3cc31052112baa27e4d43ed475189f	0	0	0	19	0	0	0	0	0	0	0	0	0	0	0	0	0	0	0	0	0	0	0	0	0	0	0	0	0	0	0	0	0	0	0	0	0
59e0f1c21702a48135114408c134f553	0	0	0	0	0	0	0	0	0	0	0	0	0	0	0	0	0	0	0	0	0	0	0	0	0	0	0	0	0	0	19	0	0	0	0	0	0
5801e483ef7b286d749cbfd02c97000e	19	0	0	0	0	0	0	0	0	0	0	0	0	0	0	0	0	0	0	0	0	0	0	0	0	0	0	0	0	0	0	0	0	0	0	0	0
5794c25923a041a1314b056acd81f74a	7	9	0	0	0	0	0	0	0	0	0	0	0	0	0	0	0	0	3	0	0	0	0	0	0	0	0	0	0	0	0	0	0	0	0	0	0
55ea70024c35fbc70d016143d1ccf6c4	0	0	0	0	0	0	0	0	0	19	0	0	0	0	0	0	0	0	0	0	0	0	0	0	0	0	0	0	0	0	0	0	0	0	0	0	0
4d2170e0ad0923b8792b0524f34288c1	0	19	0	0	0	0	0	0	0	0	0	0	0	0	0	0	0	0	0	0	0	0	0	0	0	0	0	0	0	0	0	0	0	0	0	0	0
46f26efebdb24034d361f780537b1f28	0	0	0	0	0	0	0	0	0	0	0	0	0	0	0	0	0	0	0	0	0	0	0	0	0	0	0	0	0	0	0	0	0	0	0	19	0
469bccadbd5d0d4b76b1f0773b75d3a0	0	19	0	0	0	0	0	0	0	0	0	0	0	0	0	0	0	0	0	0	0	0	0	0	0	0	0	0	0	0	0	0	0	0	0	0	0
2e0e974cffc3cd6b3c9c057f64e781fb	0	19	0	0	0	0	0	0	0	0	0	0	0	0	0	0	0	0	0	0	0	0	0	0	0	0	0	0	0	0	0	0	0	0	0	0	0
26ce9c951093f9094872c18e85b0ed0b	0	0	0	0	0	0	0	0	0	0	0	0	0	0	0	0	0	0	0	0	0	0	0	0	19	0	0	0	0	0	0	0	0	0	0	0	0
1b504a0cf8ad7d05faeaa7d4fd8880c2	0	19	0	0	0	0	0	0	0	0	0	0	0	0	0	0	0	0	0	0	0	0	0	0	0	0	0	0	0	0	0	0	0	0	0	0	0
196834c5b775caf30f21b0b3a6185580	0	0	0	19	0	0	0	0	0	0	0	0	0	0	0	0	0	0	0	0	0	0	0	0	0	0	0	0	0	0	0	0	0	0	0	0	0
137c89093caac0f350ca1c4325524e1a	0	0	0	0	0	0	0	19	0	0	0	0	0	0	0	0	0	0	0	0	0	0	0	0	0	0	0	0	0	0	0	0	0	0	0	0	0
136e1ec36a485ba019af7e69848c62f7	0	19	0	0	0	0	0	0	0	0	0	0	0	0	0	0	0	0	0	0	0	0	0	0	0	0	0	0	0	0	0	0	0	0	0	0	0
0f4b068664874644501b8eaad3265549	0	0	0	0	0	0	0	0	2	0	0	0	0	0	0	0	0	0	0	0	0	0	0	0	17	0	0	0	0	0	0	0	0	0	0	0	0
0f092731a919f941ccb6621f0ae55fc7	0	0	0	0	0	0	0	0	0	0	0	0	0	0	0	0	0	0	0	0	0	0	0	0	0	0	0	0	0	0	0	0	0	0	0	0	19
08ca16a5dd15b04017aec2edd119f7a1	0	0	0	0	0	0	0	19	0	0	0	0	0	0	0	0	0	0	0	0	0	0	0	0	0	0	0	0	0	0	0	0	0	0	0	0	0
087e2e998ee203fc20fe0a26a73e7dce	0	0	0	0	0	0	0	0	0	0	0	0	0	0	0	0	0	0	0	0	0	0	0	0	0	0	0	0	0	0	0	12	0	7	0	0	0
080cdde0310e290b1bb99487baca6e42	0	0	0	0	0	0	0	0	0	0	0	0	0	0	0	0	0	0	0	0	0	0	0	0	0	0	0	0	0	6	0	13	0	0	0	0	0
074c7394e7ccde445f4266ef6b77b810	0	19	0	0	0	0	0	0	0	0	0	0	0	0	0	0	0	0	0	0	0	0	0	0	0	0	0	0	0	0	0	0	0	0	0	0	0
[truncated: 2,987 more rows]
